# Supplementary material
Source: Royal Society of Chemistry journal article supplement (doi:10.1039/d6qo00451b)
Supplement: d6qo00451b2.pdf [file d6qo00451b2.pdf]

## Supporting Information

### **Clarifying Stereochemical Outcomes in Radical-Initiated Vinyl Cyclopropane Cycloadditions within the Beckwith-Houk Framework**

Caitlyn O. Agee,<sup>[a]</sup> Het Vyas,<sup>[b]</sup> Brandon S. Portela,<sup>[d]</sup> Amreen K. Bains,<sup>[c]</sup> Kun-Long Song<sup>[c]</sup>, Maurice Médebielle<sup>[c]</sup>, Robert. S. Paton,<sup>[d]</sup> Abhishek Sharma,<sup>[b]</sup> Jérémy Merad,<sup>[c]</sup> Garret M. Miyake,<sup>[d]</sup> and R. Thomas Williamson<sup>[a]</sup>

## Contents

|                                                     |    |
|-----------------------------------------------------|----|
| Experimental Section.....                           | 2  |
| Characterization of Products.....                   | 3  |
| NMR Acquisition Parameters.....                     | 9  |
| DFT Methods.....                                    | 9  |
| Chemical Shift calculations.....                    | 9  |
| Activation Energy Calculations.....                 | 9  |
| DFT-Predicted vs. Experimental Chemical Shifts..... | 18 |
| Cartesian Coordinates.....                          | 40 |
| References.....                                     | 89 |

## Experimental Section

### *Preparation of Known Compounds*

The synthesis of compounds **1** and **2** were carried out according to the literature procedure reported by Miyake et al. with no modifications. The synthesis of compounds **3-5** were carried out according to the literature procedure reported by Merad et al. with no modifications. The synthesis of compounds **6-10** were carried out according to the literature procedure reported by Sharma et al. with no modifications.

## Characterization of Products

For these studies,  $^1\text{H}$  NMR chemical shifts and coupling constants were recorded again using Bruker 500 MHz NEO NMR spectrometer (operating at 499.79 MHz for  $^1\text{H}$ ) equipped with a multinuclear TCI Prodigy Cryoprobe.

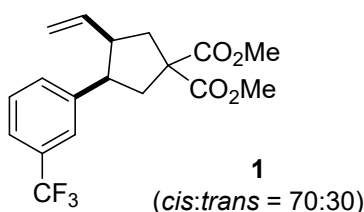

Colorless oil (49.6 mg, 70% yield) as a mixture of diastereomers (*cis* : *trans* = 70:30).  $R_f$  = 0.40 (10% EtOAc in hexane).

$^1\text{H}$  NMR (500 MHz,  $\text{CDCl}_3$ )  $\delta$  7.91 – 7.71 (m, 6H), 5.73 (ddd,  $J$  = 17.1, 10.3, 8.2 Hz, 1H), 5.34 – 5.18 (m, 3H), 4.17 (t,  $J$  = 4.3 Hz, 8H), 3.90 (dt,  $J$  = 10.9, 7.4 Hz, 1H), 3.50 – 3.42 (m, 1H), 3.24 – 3.10 (m, 2H), 3.10 – 3.03 (m, 1H), 2.99 (dd,  $J$  = 13.7, 10.9 Hz, 1H), 2.85 – 2.72 (m, 2H), 2.65 – 2.55 (m, 1H).

$^{13}\text{C}$  NMR (100 MHz,  $\text{CDCl}_3$ )  $\delta$  172.9, 172.8, 172.7, 172.5, 142.6, 141.7, 138.2, 137.5, 131.7, 131.7, 131.7, 131.0, 130.9, 130.8, 130.5, 130.5, 130.2, 129.9, 128.8, 128.5, 125.6, 125.1, 125.1, 125.0, 125.0, 124.4, 124.4, 124.3, 123.5, 123.4, 123.4, 123.2, 123.2, 123.1, S24 123.1, 122.9, 116.2, 116.1, 58.9, 58.1, 53.0, 52.9, 52.8, 51.1, 51.0, 47.9, 47.3, 42.2, 40.3, 38.9, 37.9.

$^{19}\text{F}$  NMR (376 MHz,  $\text{CDCl}_3$ )  $\delta$  -62.60, -62.61.

**DART-TOF LC/MS**  $m/z$  calcd. for  $\text{C}_{18}\text{H}_{19}\text{F}_3\text{O}_4$  [ $\text{M}+\text{H}^+$ ] 357.1314, found 357.1314.

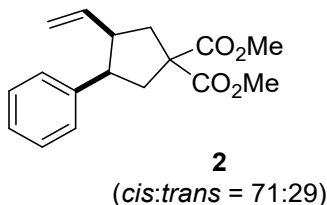

Colorless oil (50.4 mg, 88% yield) as a mixture of diastereomers (*cis* : *trans* = 71:29).  $R_f$  = 0.35 (10% EtOAc in hexane).

$^1\text{H}$  NMR (500 MHz,  $\text{CDCl}_3$ )  $\delta$  7.75 – 7.67 (m, 3H), 7.67 – 7.54 (m, 4H), 5.79 (ddd,  $J$  = 17.1, 10.4, 8.0 Hz, 1H), 5.44 – 5.18 (m, 3H), 3.87 (dt,  $J$  = 10.7, 7.5 Hz, 1H), 3.45 (p,  $J$  = 7.3 Hz, 1H), 3.22 (dd,  $J$  = 13.6, 7.7 Hz, 1H), 3.19 – 3.12 (m, 2H), 3.12 – 2.97 (m, 2H), 2.87 – 2.74 (m, 1H).

$^{13}\text{C}$  NMR (100 MHz,  $\text{CDCl}_3$ )  $\delta$  173.1, 173.0, 172.9, 172.7, 141.5, 140.8, 138.7, 138.2, 128.4, 128.3, 128.1, 127.6, 126.6, 126.3, 115.6, 115.4, 59.0, 58.1, 52.9, 52.8, 51.5, 50.9, 48.0, 47.3, 42.5, 40.3, 39.0, 38.1.

**DART-TOF LC/MS**  $m/z$  calcd. for  $\text{C}_{17}\text{H}_{21}\text{O}_4$  [ $\text{M}+\text{H}^+$ ] 289.1440, found 289.1442.

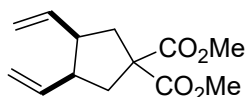

**3**  
(*cis:trans* = 57:43)

Colorless oil: (27 mg, 0.12 mmol, 60%) as an unseparable mixture of two diastereomers : (*cis trans* = 57:43).

$^1\text{H}$  NMR (500 MHz,  $\text{CDCl}_3$ )  $\delta$  5.75 – 5.59 (m, 4H), 5.05 – 4.95 (m, 8H), 2.76 (dt,  $J$  = 7.5, 5.3 Hz, 2H), 2.60 – 2.51 (m, 2H), 2.47 (ddt,  $J$  = 12.2, 7.1, 5.2 Hz, 2H), 2.36 – 2.26 (m, 2H), 2.25 – 2.16 (m, 2H), 2.08 – 1.98 (m, 2H).

$^{13}\text{C}$  NMR (75 MHz,  $\text{CDCl}_3$ )  $\delta$  173.2, 173.0, 172.9, 139.2, 138.4, 115.6, 115.4, 59.1, 58.3, 53.0, 52.9, 49.8, 47.2, 40.2, 38.9;

**HRMS** (ESI+,  $m/z$ ): [ $\text{M}+\text{H}$ ] + calculated for [ $\text{C}_{13}\text{H}_{19}\text{O}_4$ ] + : 239.1278, found 239.1276.

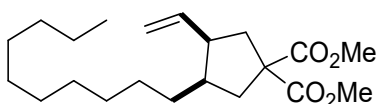

**4**  
(*cis:trans* = 68:32)

Colorless oil: (12.5 mg, 0.035 mmol, 18%) as an unseparable mixture of two diastereomers: (*cis : trans* = 68:32).

$^1\text{H}$  NMR (500 MHz,  $\text{CDCl}_3$ )  $\delta$  5.81 – 5.56 (m, 1H), 5.06 – 4.91 (m, 3H), 2.69 (p,  $J$  = 7.0 Hz, 1H), 2.47 (dd,  $J$  = 14.0, 7.3 Hz, 1H), 2.36 (dd,  $J$  = 12.3, 5.6 Hz, 1H), 2.18 (dd,  $J$  = 14.0, 5.4 Hz, 1H), 2.05 – 1.92 (m, 2H), 1.18 – 1.07 (m, 2H), 0.95 – 0.75 (m, 6H).

$^{13}\text{C}$  NMR (75 MHz,  $\text{CDCl}_3$ )  $\delta$  173.5, 173.4, 173.31, 173.29, 140.5, 138.5, 115.4, 115.3, 59.07, 59.06, 52.9, 52.8, 50.6, 46.5, 45.4, 43.1, 40.7, 40.4, 39.4, 33.3, 32.1, 30.6, 29.9, 29.8 (4C), 29.5, 28.3, 22.8, 14.3

HRMS (ESI+, m/z):  $[\text{M}+\text{Na}]^+$  calculated for  $[\text{C}_{21}\text{H}_{36}\text{NaO}_4]^+$  : 375,2506 found 375.2509.

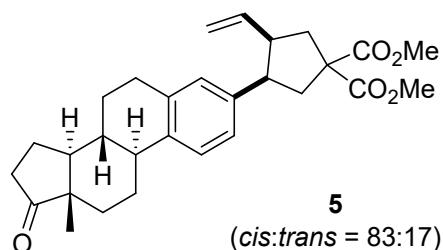

Colorless oil: (72 mg, 0.15 mmol, 77%) as an unseparable mixture of two diastereomers: (*cis* : *trans* = 83:17).

$^1\text{H}$  NMR (500 MHz,  $\text{CDCl}_3$ )  $\delta$  7.94 – 7.71 (m, 1H), 7.58 (dq,  $J$  = 22.9, 9.1 Hz, 1H), 7.44 – 7.29 (m, 1H), 7.27 (d,  $J$  = 23.0 Hz, 1H), 5.84 – 5.69 (m, 1H), 5.34 – 5.15 (m, 3H), 4.13 (d,  $J$  = 5.5 Hz, 9H), 3.83 – 3.67 (m, 1H), 3.37 (tt,  $J$  = 24.4, 8.0 Hz, 2H), 3.26 (dd,  $J$  = 7.6, 4.2 Hz, 1H), 3.24 – 3.09 (m, 2H), 3.05 (ddd,  $J$  = 13.8, 7.0, 2.5 Hz, 2H), 3.02 – 2.85 (m, 5H), 2.85 – 2.75 (m, 2H), 2.75 – 2.61 (m, 2H), 2.51 (tdd,  $J$  = 28.0, 12.9, 7.3 Hz, 4H), 2.43 – 2.35 (m, 2H), 2.35 – 2.21 (m, 2H), 2.21 – 2.06 (m, 2H), 2.06 – 1.89 (m, 4H), 1.89 – 1.84 (m, 1H), 1.84 – 1.76 (m, 1H), 1.56 (s, 1H), 1.39 – 1.25 (m, 3H).

$^{13}\text{C}$  NMR (100 MHz,  $\text{CDCl}_3$ )  $\delta$  173.3, 173.20, 173.19, 173.1, 172.9, 139.1, 139.0, 138.5, 138.3, 138.2, 138.12, 138.10, 137.7, 136.6, 136.5, 136.2, 129.3, 128.9, 128.5, 128.1, 126.2, 125.8, 125.6, 125.5, 125.3, 125.1, 124.9, 115.7, 115.4, 68.1, 59.1, 58.2, 53.1, 53.0, 51.04, 51.02, 50.7, 50.5, 50.4, 48.2, 47.7, 47.6, 47.23, 47.20, 44.5, 44.4, 42.8, 42.8, 41.0, 40.4, 39.2, 38.44, 38.37, 38.29, 38.27, 36.0, 31.7, 29.59, 29.55, 26.7, 25.8, 21.7, 14.0. According to literature data. <sup>[34]</sup>

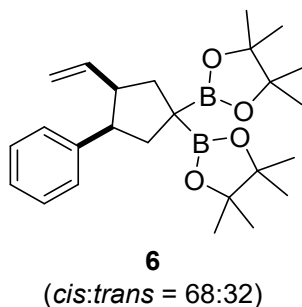

Colorless oil; 71% yield (93 mg), as a mixture of diastereomers (*cis* : *trans* = 68:32). R<sub>f</sub> (EtOAc/Hexane, 10:90) = 0.5

$^1\text{H}$  NMR (500 MHz,  $\text{CDCl}_3$ )  $\delta$  7.35 – 7.17 (m, 3H), 4.99 – 4.82 (m, 1H), 2.59 – 2.40 (m, 1H), 2.40 – 2.21 (m, 1H), 2.14 – 2.03 (m, 1H), 1.32 (dd,  $J$  = 5.4, 2.9 Hz, 13H).

$^{13}\text{C}$  NMR (100 MHz,  $\text{CDCl}_3$ )  $\delta$  144.3, 142.9, 141.3, 139.6, 128.6, 128.1, 127.81, 127.8, 125.9, 125.7, 114.4, 114.0, 83.33, 83.3, 83.25, 83.2, 53.4, 53.1, 50.2, 49.1, 39.1, 37.1, 35.4, 33.7, 24.8, 24.76, 24.73, 24.7.

$^{11}\text{B}$  NMR (128 MHz,  $\text{CDCl}_3$ )  $\delta$  34.6.

HRMS (ASAP):  $m/z$   $[\text{M}+\text{H}]^+$  for  $\text{C}_{25}\text{H}_{39}\text{B}_2\text{O}_4$ , calculated 425.3029; observed 425.3043.

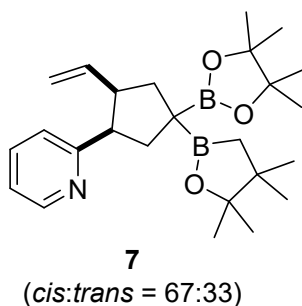

Brown oil; 46% Yield (60 mg), as a mixture of diastereomers (*cis* : *trans* = 67:33)  $R_f$  (EtOAc/Hexane, 20:80) = 0.2

$^1\text{H}$  NMR (500 MHz,  $\text{CDCl}_3$ )  $\delta$  8.49 (dd,  $J$  = 5.1, 1.8 Hz, 1H), 7.57 – 7.48 (m, 1H), 7.14 – 6.99 (m, 2H), 4.92 – 4.75 (m, 2H), 2.46 – 2.19 (m, 3H), 2.17 – 1.97 (m, 1H), 1.23 (dd,  $J$  = 9.5, 2.8 Hz, 29H).

$^{13}\text{C}$  NMR (100 MHz,  $\text{CDCl}_3$ )  $\delta$  163.7, 162.8, 149.0, 148.7, 141.3, 139.5, 136.0, 135.6, 122.7, 122.3, 121.1, 120.8, 114.3, 113.8, 83.3, 83.25, 83.23, 83.2, 55.5, 52.6, 52.1, 49.2, 38.4, 36.8, 35.4, 33.5, 24.8, 24.76, 24.72, 24.7.

$^{11}\text{B}$  NMR (128 MHz,  $\text{CDCl}_3$ )  $\delta$  34.5.

HRMS (ASAP):  $m/z$   $[\text{M}+\text{H}]^+$  for  $\text{C}_{24}\text{H}_{38}\text{B}_2\text{NO}_4$ , calculated 426.2981; observed 426.2992.

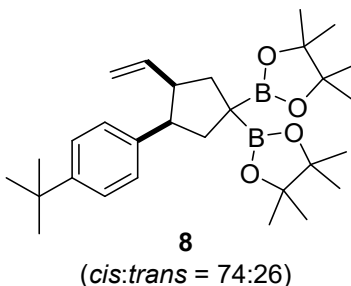

Colorless oil; 68% Yield (101 mg), as a mixture of diastereomers (*cis* : *trans* = 74:26)  $R_f$  (EtOAc/Hexane, 10:90) = 0.5

<sup>1</sup>H NMR (500 MHz, CDCl<sub>3</sub>) δ 7.30 – 7.25 (m, 2H), 7.15 (dd, *J* = 16.8, 8.3 Hz, 2H), 4.97 – 4.89 (m, 1H), 4.82 (dt, *J* = 10.4, 1.6 Hz, 1H), 3.16 (dt, *J* = 10.2, 6.9 Hz, 1H), 2.94 – 2.85 (m, 1H), 2.44 – 2.34 (m, 1H), 2.28 – 2.14 (m, 2H), 2.10 – 2.01 (m, 1H), 1.30 (s, 10H), 1.29 – 1.21 (m, 28H).

<sup>13</sup>C NMR (100 MHz, CDCl<sub>3</sub>) δ 148.4, 148.3, 141.7, 141.1, 139.7, 128.2, 127.3, 125.0, 124.7, 114.4, 113.8, 83.31, 83.3, 83.2, 83.16, 52.8, 52.6, 49.6, 48.8, 39.1, 37.0, 35.3, 34.4, 33.7, 31.5, 24.8, 24.78, 24.75, 24.73, 24.7.

<sup>11</sup>B NMR (128 MHz, CDCl<sub>3</sub>) δ 35.2.

HRMS (ASAP): *m/z* [M+H]<sup>+</sup> for C<sub>29</sub>H<sub>47</sub>B<sub>2</sub>O<sub>4</sub>, calculated 481.3655; observed 481.3669.

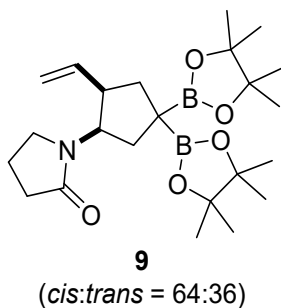

Yellow oil; 37% Yield (49 mg), as a mixture of diastereomers (*cis* : *trans* = 64:36) *R<sub>f</sub>* (EtOAc/Hexane, 10:90) = 0.3.

<sup>1</sup>H NMR (500 MHz, CDCl<sub>3</sub>) δ 5.83 (ddd, *J* = 17.0, 10.5, 6.4 Hz, 0H), 5.74 (ddd, *J* = 17.2, 10.4, 6.6 Hz, 1H), 5.23 – 5.08 (m, 1H), 5.07 – 4.91 (m, 2H), 4.83 (ddt, *J* = 12.3, 8.1, 4.0 Hz, 0H), 4.44 (q, *J* = 7.9 Hz, 1H), 3.87 (q, *J* = 7.1 Hz, 0H), 3.36 (dt, *J* = 9.5, 7.1 Hz, 2H), 3.28 (dt, *J* = 10.6, 7.1 Hz, 2H), 2.75 (p, *J* = 7.3 Hz, 1H), 2.58 – 2.29 (m, 4H), 2.20 (ddd, *J* = 28.0, 12.9, 7.4 Hz, 2H), 2.02 – 1.82 (m, 3H), 1.76 (dd, *J* = 12.7, 7.6 Hz, 1H), 1.23 (d, *J* = 4.6 Hz, 17H), 1.21 (s, 15H), 1.19 (s, 21H).

<sup>13</sup>C NMR (100 MHz, CDCl<sub>3</sub>) δ 175.2, 137.8, 135.7, 116.9, 115.3, 83.4, 83.3, 55.7, 53.4, 47.4, 46.2, 45.8, 43.6, 41.7, 34.0, 31.5, 31.3, 24.7, 24.6, 24.5, 18.4, 18.3.

<sup>11</sup>B NMR (128 MHz, CDCl<sub>3</sub>) δ 33.5.

HRMS (ASAP): *m/z* [M+H]<sup>+</sup> for C<sub>23</sub>H<sub>40</sub>B<sub>2</sub>NO<sub>5</sub>, calculated 432.3087; observed 432.3102.

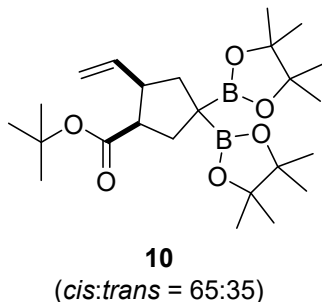

Colorless oil; 48% Yield (67 mg), as a mixture of diastereomers (*cis* : *trans* = 65:35) R<sub>f</sub> (EtOAc/Hexane, 10:90) = 0.3.

<sup>1</sup>H NMR (500 MHz, CDCl<sub>3</sub>) δ 5.75 (ddt, *J* = 17.7, 10.3, 7.5 Hz, 1H), 5.08 – 4.85 (m, 2H), 2.77 – 2.67 (m, 1H), 2.36 – 2.15 (m, 1H), 2.10 (dd, *J* = 17.1, 6.8 Hz, 2H), 1.96 – 1.88 (m, 1H), 1.39 (d, *J* = 6.7 Hz, 9H), 1.23 – 1.17 (m, 24H).

<sup>13</sup>C NMR (100 MHz, CDCl<sub>3</sub>) δ 174.7, 173.7, 140.9, 138.9, 114.9, 114.0, 83.4, 83.33, 83.3, 83.2, 79.9, 79.8, 52.3, 50.3, 49.4, 48.2, 36.8, 35.8, 34.4, 32.3, 28.4, 28.3, 24.8, 24.77, 24.74, 24.7.

<sup>11</sup>B NMR (128 MHz, CDCl<sub>3</sub>) δ 34.1.

HRMS (ASAP): *m/z* [M+H]<sup>+</sup> for C<sub>24</sub>H<sub>43</sub>B<sub>2</sub>O<sub>6</sub>, calculated 449.3240; observed 449.3243

## NMR Acquisition Parameters

### *NMR Parameters for 1D qNOE experiments*

1D NOESY experiments were acquired on a Bruker 500 MHz NEO NMR spectrometer (operating at 499.79 MHz for <sup>1</sup>H) equipped with a multinuclear TCI Prodigy Cryoprobe. Data were acquired using the Bruker TopSpin pulse program "selnpgp.2" with a spectral width of 10 ppm and 32 scans. The mixing time for each experiment increased in 100 msec increments from 300 to 800 msec, utilizing a 80 msec Gaussian-shaped pulse for selective excitation. qNOE experiments for compound **10** were acquired with a 40 msec Gaussian-shaped pulse.

### *NMR Parameters for 2D Undecoupled <sup>1</sup>H-<sup>13</sup>C HSQC-NOESY*

The HSQC-NOESY spectrum of **3** was acquired on a Bruker 500 MHz NEO NMR spectrometer (Operating at 499.79 MHz for  $^1\text{H}$  and 125.67 MHz for  $^{13}\text{C}$ ) equipped with a multinuclear TCI Prodigy Cryoprobe using the Bruker pulse program "hsqcetgpnosp". 3k data points were acquired in F2 (SW=10 ppm) and 128 points were acquired in F1 (SW=70 ppm). 1024 scans were acquired per increment with a 1 s relaxation delay. CNST2 was set to 145 Hz and a mixing time of 600 msec was used for the NOESY pulse sequence module.

#### *NMR Parameters for 1D PSYCHE*

The 1D PSYCHE spectrum of **10** was acquired on a Bruker 500 MHz NEO NMR spectrometer (operating at 499.79 MHz for  $^1\text{H}$ ) equipped with a multinuclear TCI Prodigy Cryoprobe using the Bruker pulse program "reset\_psyche\_1d". 10 k points were acquired in F2 and 64 points were acquired in F1 with 64 scans per increment. SW was set to 10 ppm in F2 and 1.5 ppm in F1. L31 was set to 100.

## DFT Methods

### Chemical Shift calculations

For NMR  $\delta$  prediction analysis of **1-10**, structures were energy-minimized using MMFF94 in Chem3D and extended mixed torsional/low-mode (MTLMOD) conformational searches were performed using the OPLS4<sup>33</sup> force field in the Schrödinger MacroModel software package. NMR predictions were based on the DELTA50 methodology;  $^{13}\text{C}$   $\delta$  predictions were performed at the PCM- $\omega$ B97X-D/def2-SVP//PCM-B3LYP-D3/6-311G(d,p) level of theory, and  $^1\text{H}$   $\delta$  predictions were performed at the PCM-WP04/6-311++G(2d,p)//PCM-B3LYP-D3/6-311G(d,p) level of theory, both of which were performed in the Gaussian<sup>34</sup> software package.

### Activation Energy Calculations

Activation Energy calculations, geometry optimizations and frequency calculations were conducted at the B3LYP-D3(BJ)/6-31+G\*\* level of theory under solvation (DMSO for **1**, **2**, methanol for **4** and **5**, and dichloroethane for **7**, **9** and **10**). Single-point energy calculations were done at the M06-2X-D3/def2-TZVP level of theory under solvation using the solvents listed above. Conformation analysis for stationary and saddle points was performed using the Global Optimizer Algorithm (GOAT) feature in the ORCA software.<sup>35</sup> All quantum mechanical calculations were performed using *Gaussian 16*.<sup>34</sup> Geometry optimizations and frequency calculations were performed using the hybrid B3LYP<sup>36,37</sup> functional applied with Grimme's D3<sup>38</sup> dispersion correct with Beck-Johnson (BJ)<sup>39</sup> damping and the 6-31+G(d,p)<sup>40-44</sup> basis set. Single-point energy calculations were performed on all optimized structures using the hybrid meta-GGA M06-2X<sup>45</sup> functional applied with D3 dispersion and the def2-TZVP<sup>46,47</sup> basis sets. Solvation effects were accounted for geometry optimizations and single-point energy calculations using the SMD<sup>48</sup> variation of the integral equation formalism variant of the polarizable continuum model.<sup>49-53</sup> A truncated model of **4** and **5** was used to simplify conformation analysis and computational cost.

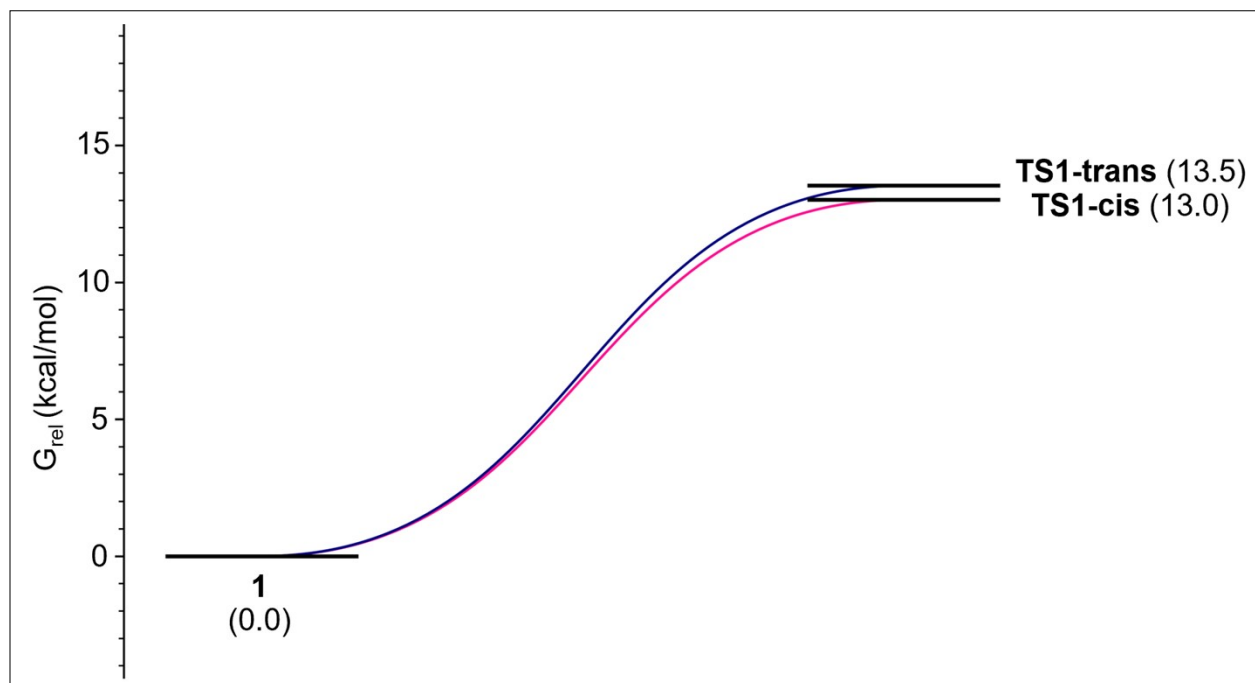

**Figure S1.** Gibbs free energy profile for the key intermediate and transition state structures for compound **1** computed at the (SMD=DMSO) M06-2X-D3/def2-TZVP//((SMD=DMSO) B3LYP-D3(BJ)/6-31+G\*\* level of theory.

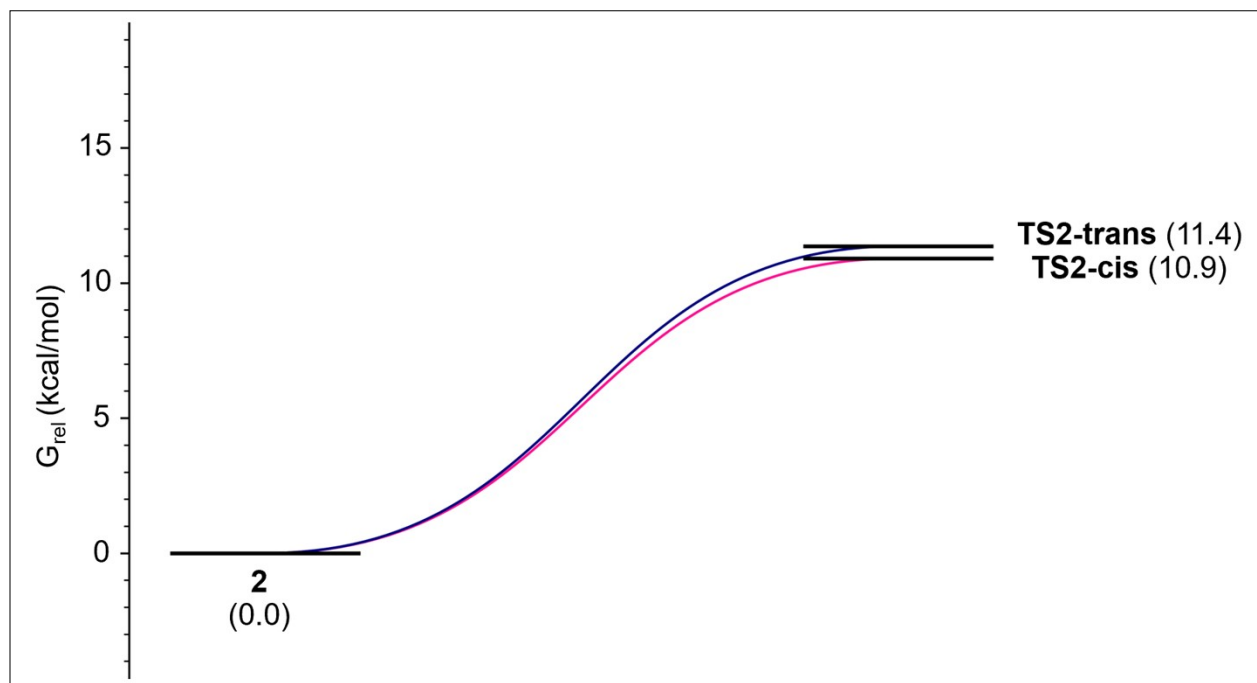

**Figure S2.** Gibbs free energy profile for the key intermediate and transition state structures for compound **2** computed at the (SMD=DMSO) M06-2X-D3/def2-TZVP//((SMD=DMSO) B3LYP-D3(BJ)/6-31+G\*\* level of theory.

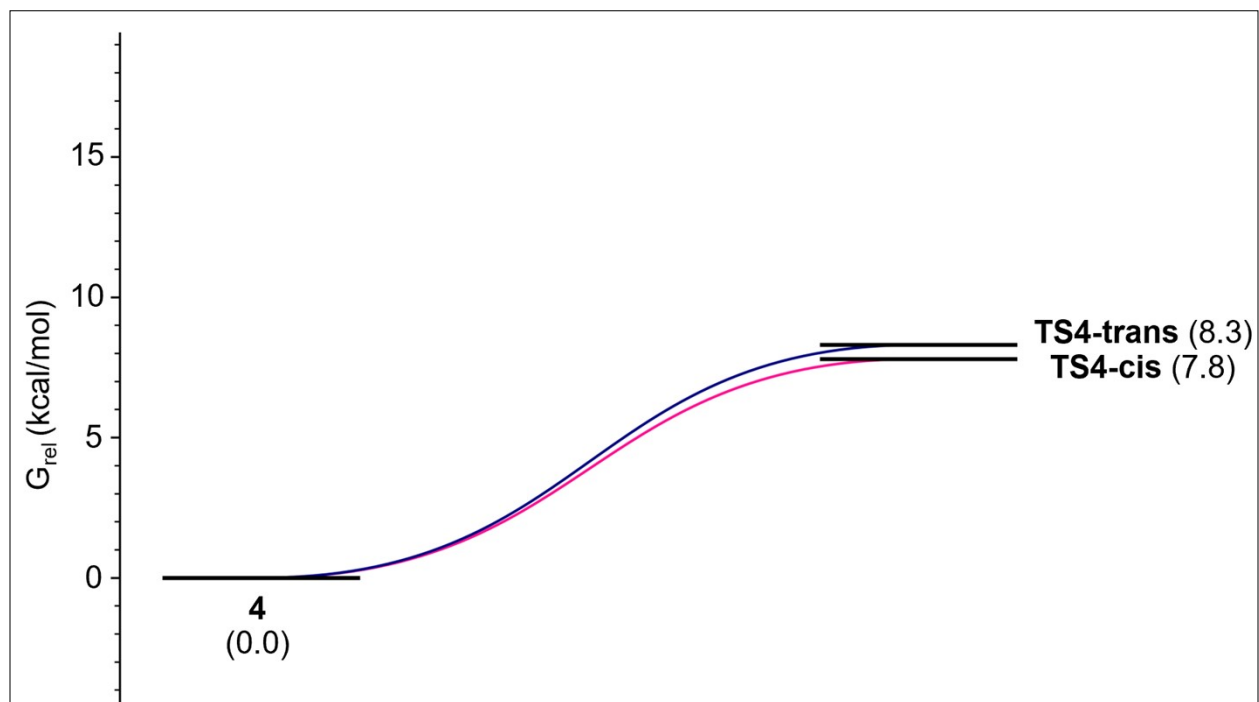

**Figure S3.** Gibbs free energy profile for the key intermediate and transition state structures for compound **4** computed at the (SMD=methanol) M06-2X-D3/def2-TZVP//((SMD=methanol) B3LYP-D3(BJ)/6-31+G\*\* level of theory.

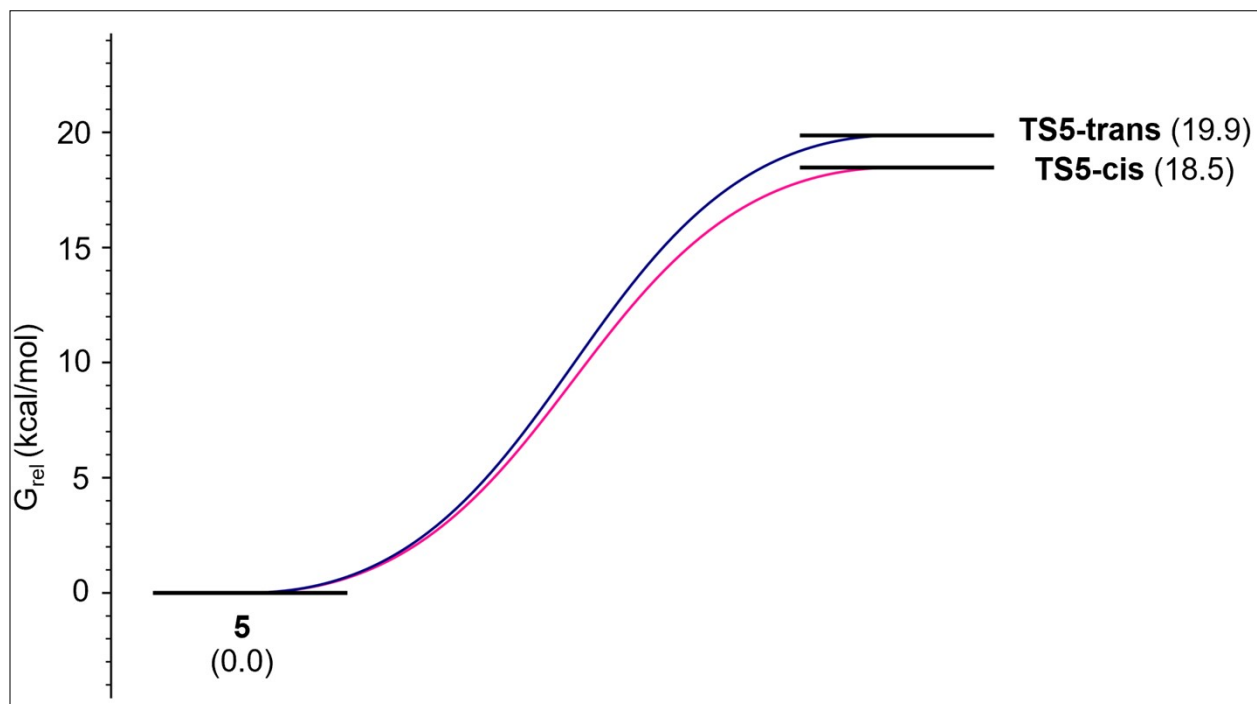

**Figure S4.** Gibbs free energy profile for the key intermediate and transition state structures for compound **5** computed at the (SMD=methanol) M06-2X-D3/def2-TZVP//((SMD=methanol) B3LYP-D3(BJ)/6-31+G\*\* level of theory.

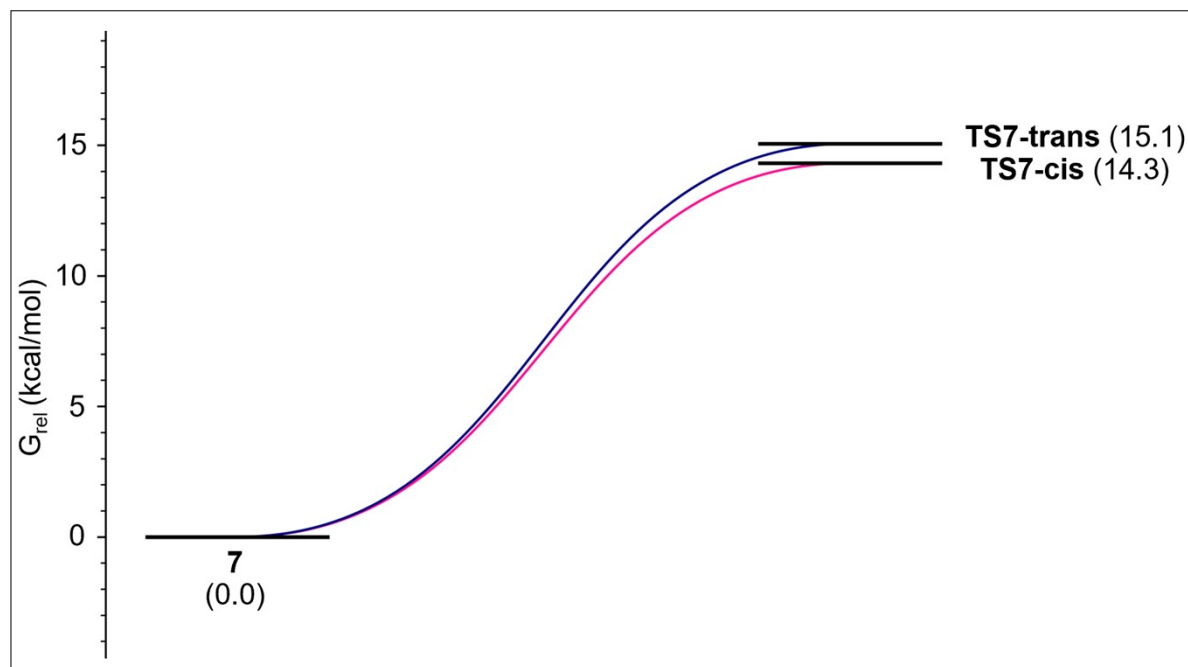

**Figure S5.** Gibbs free energy profile for the key intermediate and transition state structures for compound **7** computed at the (SMD=dichloroethane) M06-2X-D3/def2-TZVP//((SMD=dichloroethane) B3LYP-D3(BJ/6-31+G\*\* level of theory.

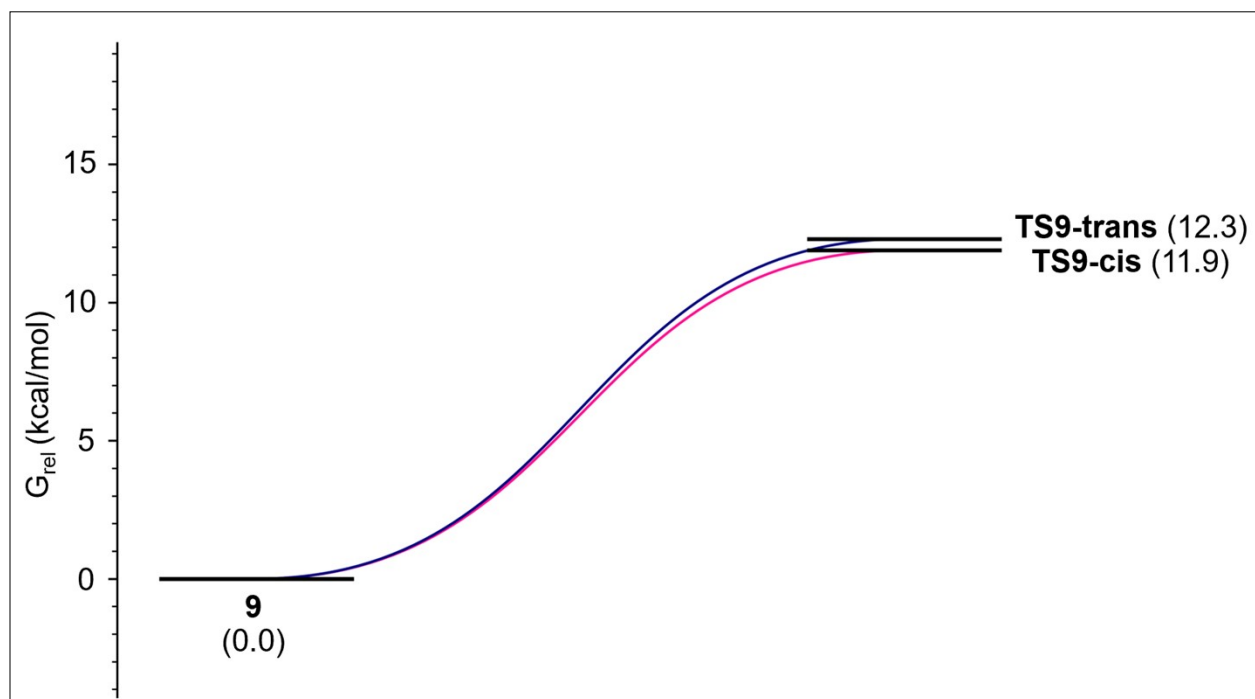

**Figure S6.** Figure Sx. Gibbs free energy profile for the key intermediate and transition state structures for compound **9** computed at the (SMD=dichloroethane) M06-2X-D3/def2-TZVP//((SMD=dichloroethane) B3LYP-D3(BJ/6-31+G\*\*) level of theory.

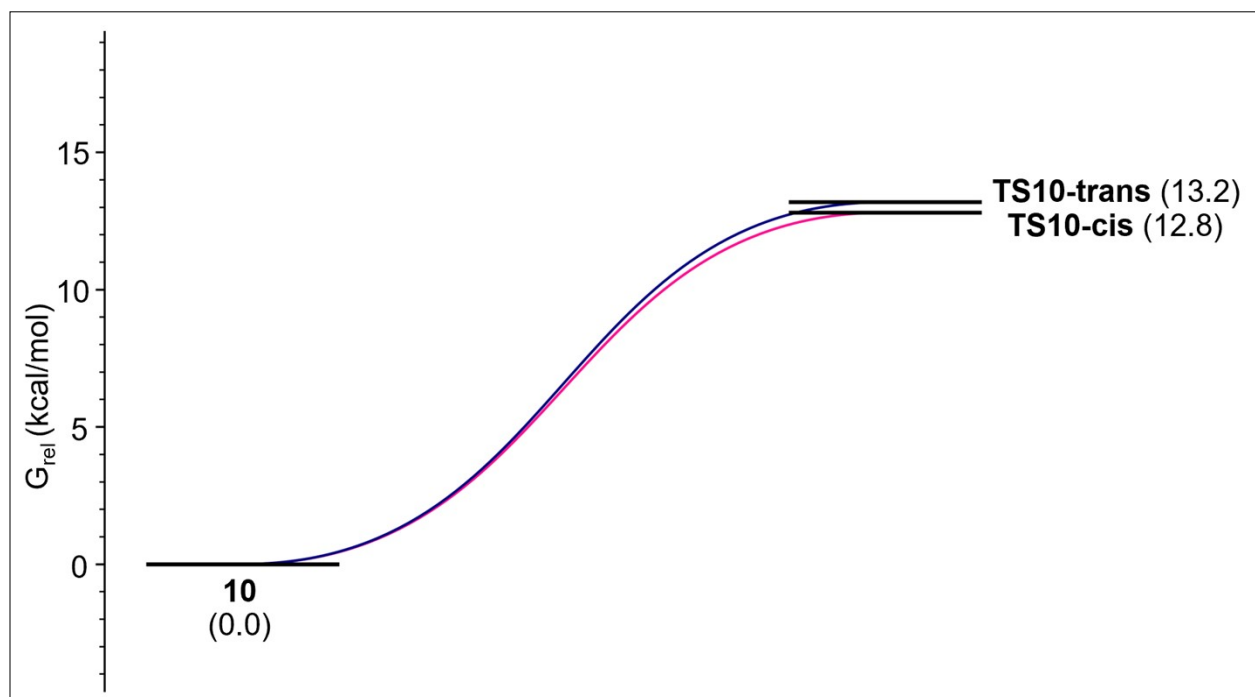

**Figure S7.** Gibbs free energy profile for the key intermediate and transition state structures for compound **10** computed at the (SMD=dichloroethane) M06-2X-D3/def2-TZVP//((SMD=dichloroethane) B3LYP-D3(BJ/6-31+G\*\* level of theory.

# DFT-Predicted vs. Experimental Chemical Shifts

1

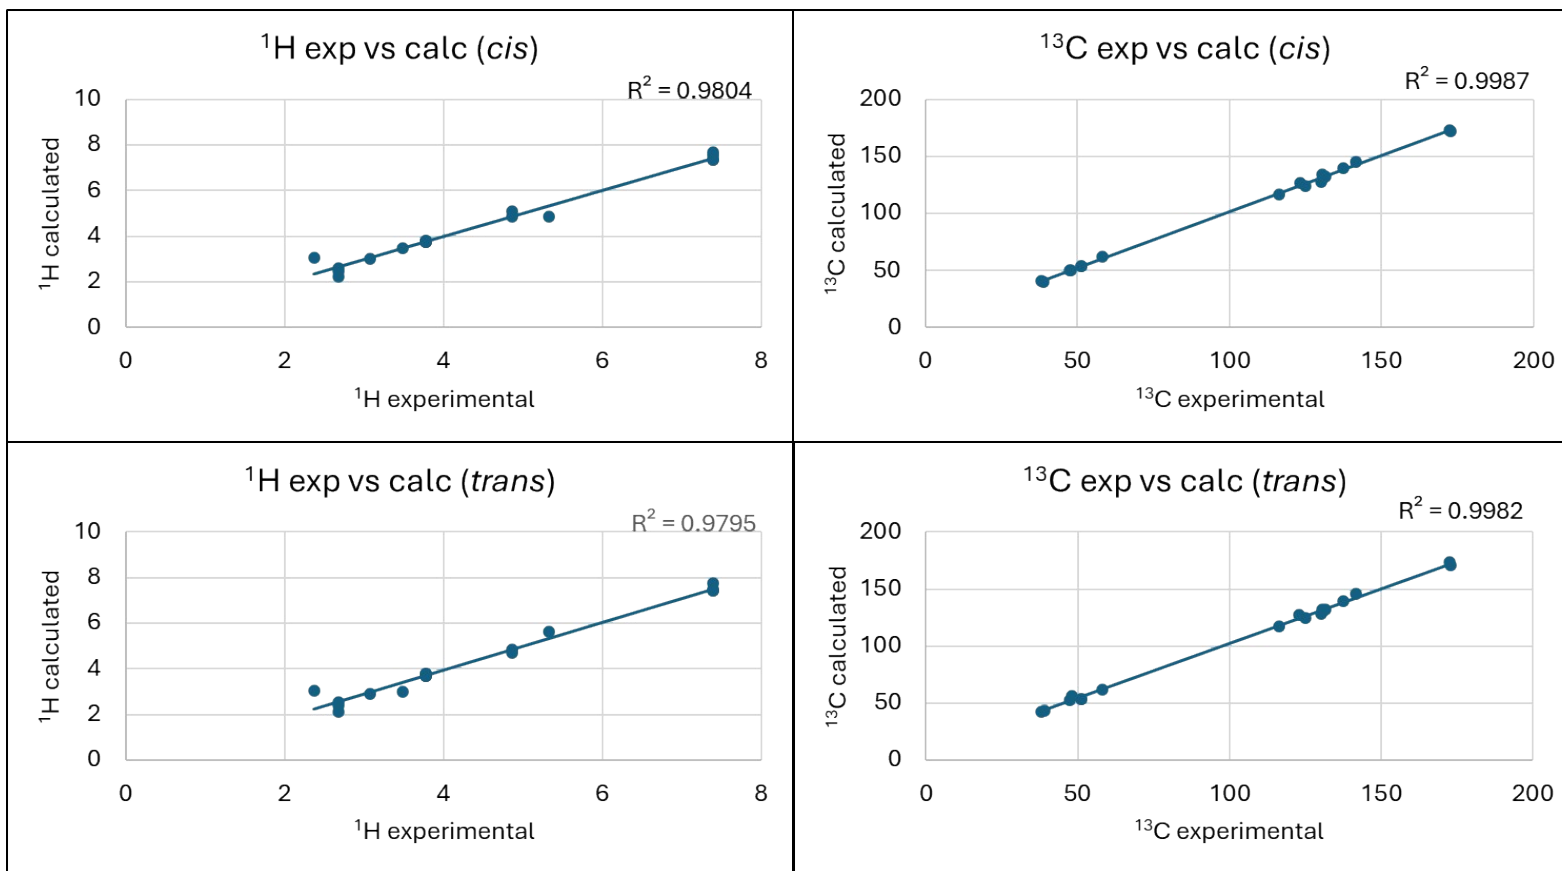

**Figure S8.**  $^1\text{H}$  and  $^{13}\text{C}$  experimental vs. calculated chemical shift plots for the *cis* and *trans* configurations of **1**.

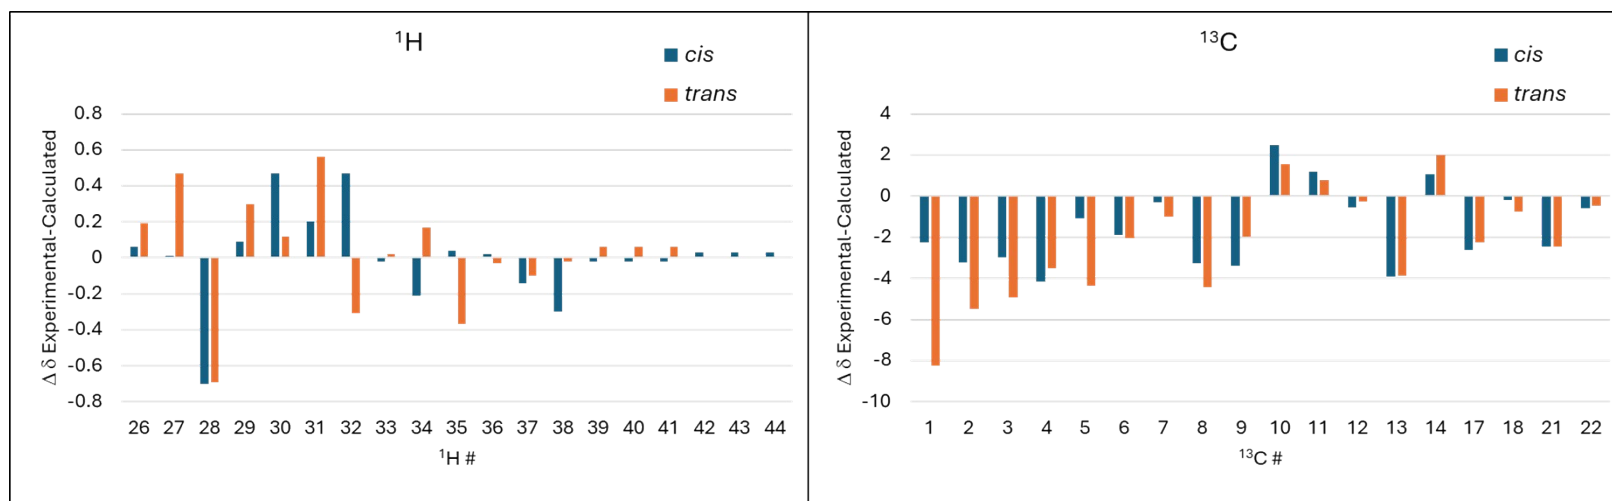

**Figure S9.**  $\Delta \delta$  for  $^1\text{H}$  and  $^{13}\text{C}$  experimental-calculated of **1**.

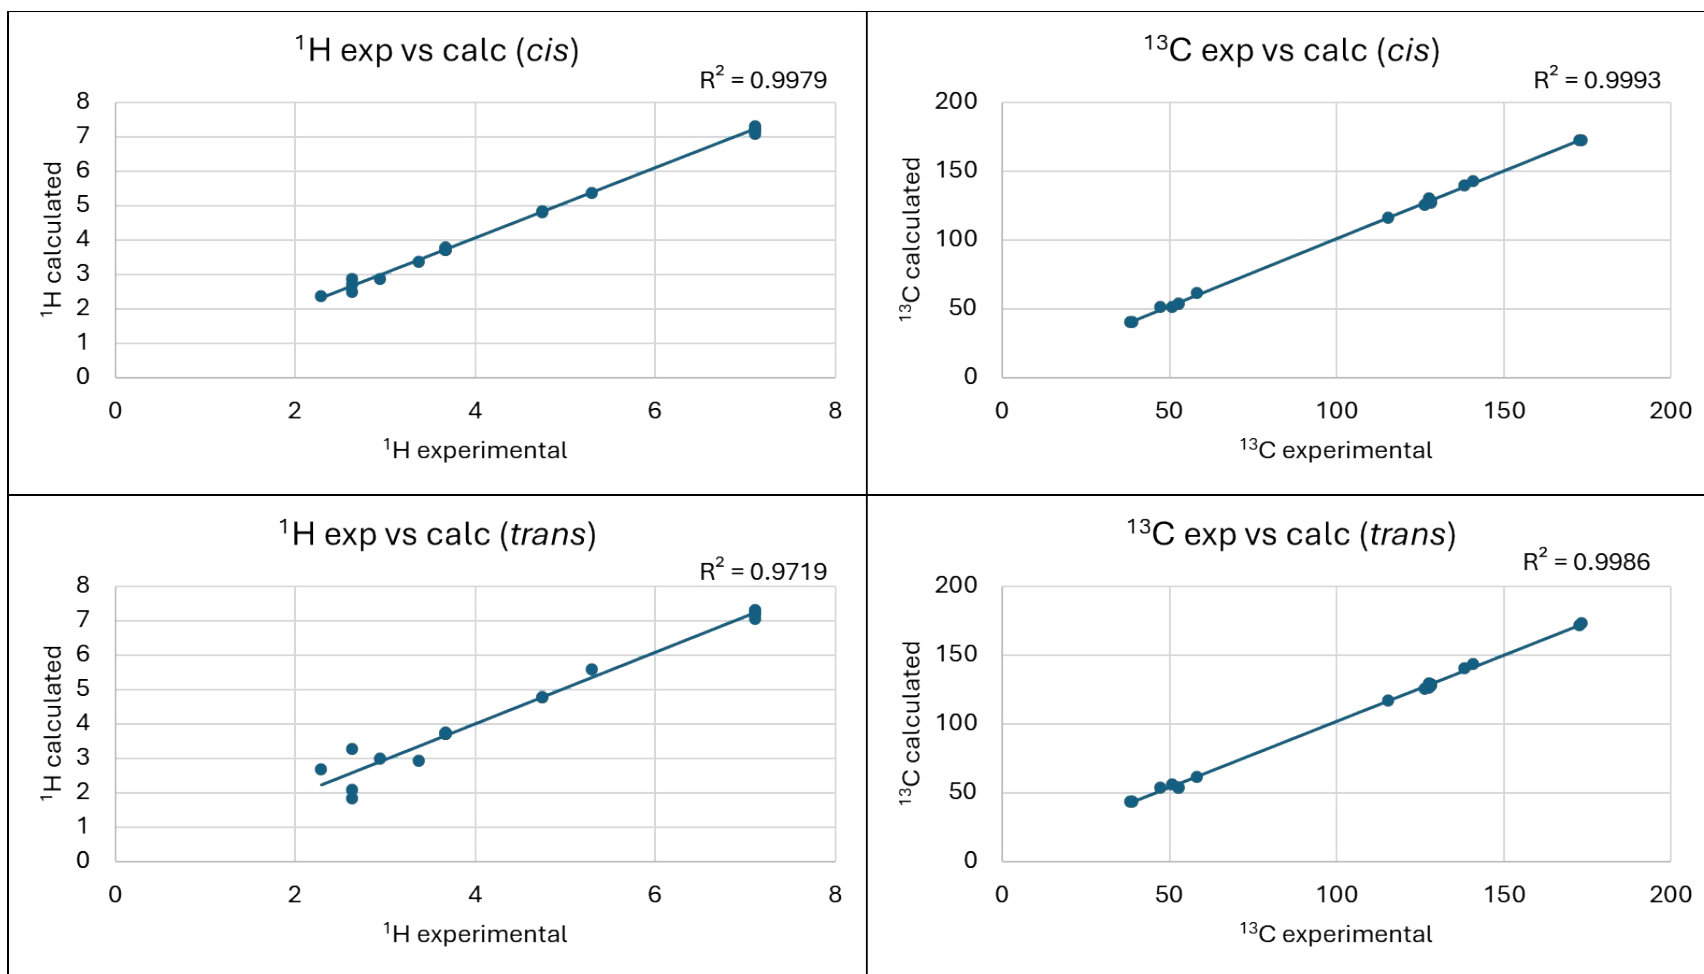

**Figure S10.**  $^1\text{H}$  and  $^{13}\text{C}$  experimental vs. calculated chemical shift plots for the *cis* and *trans* configurations of **2**.

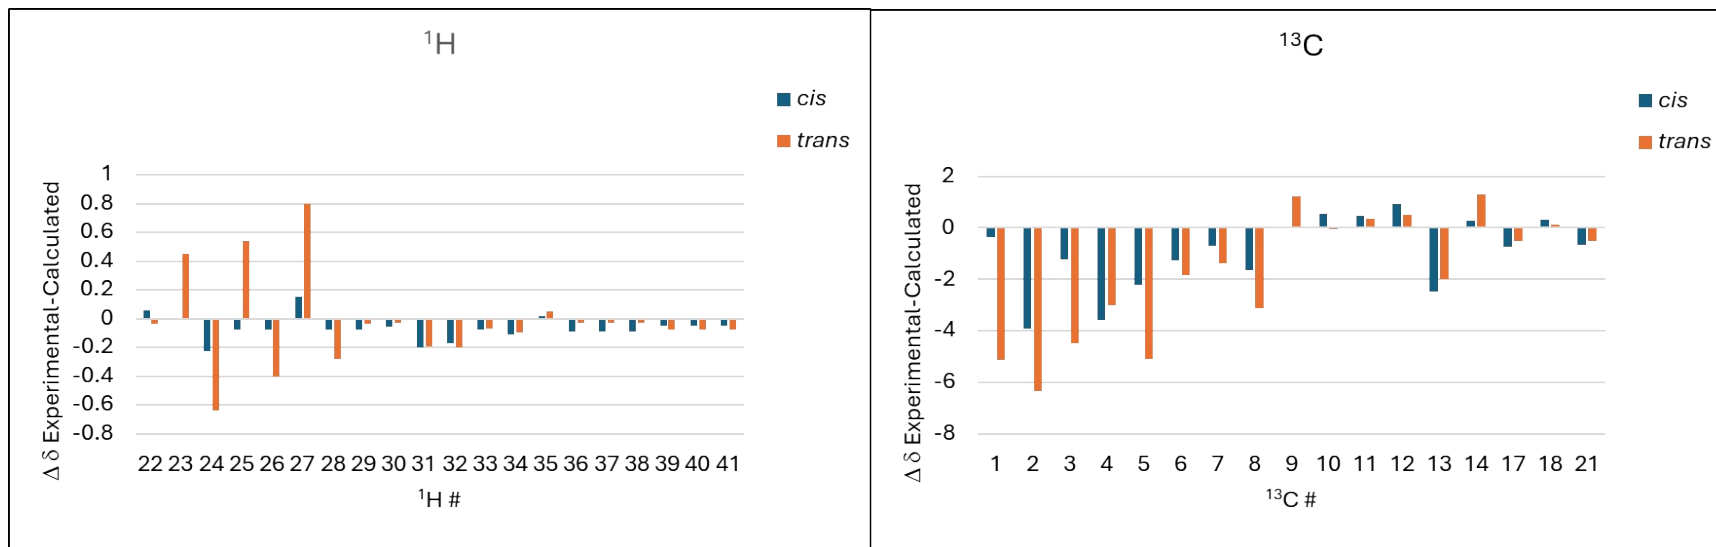

**Figure S11.**  $\Delta\delta$  for  $^1\text{H}$  and  $^{13}\text{C}$  experimental-calculated of **2**.

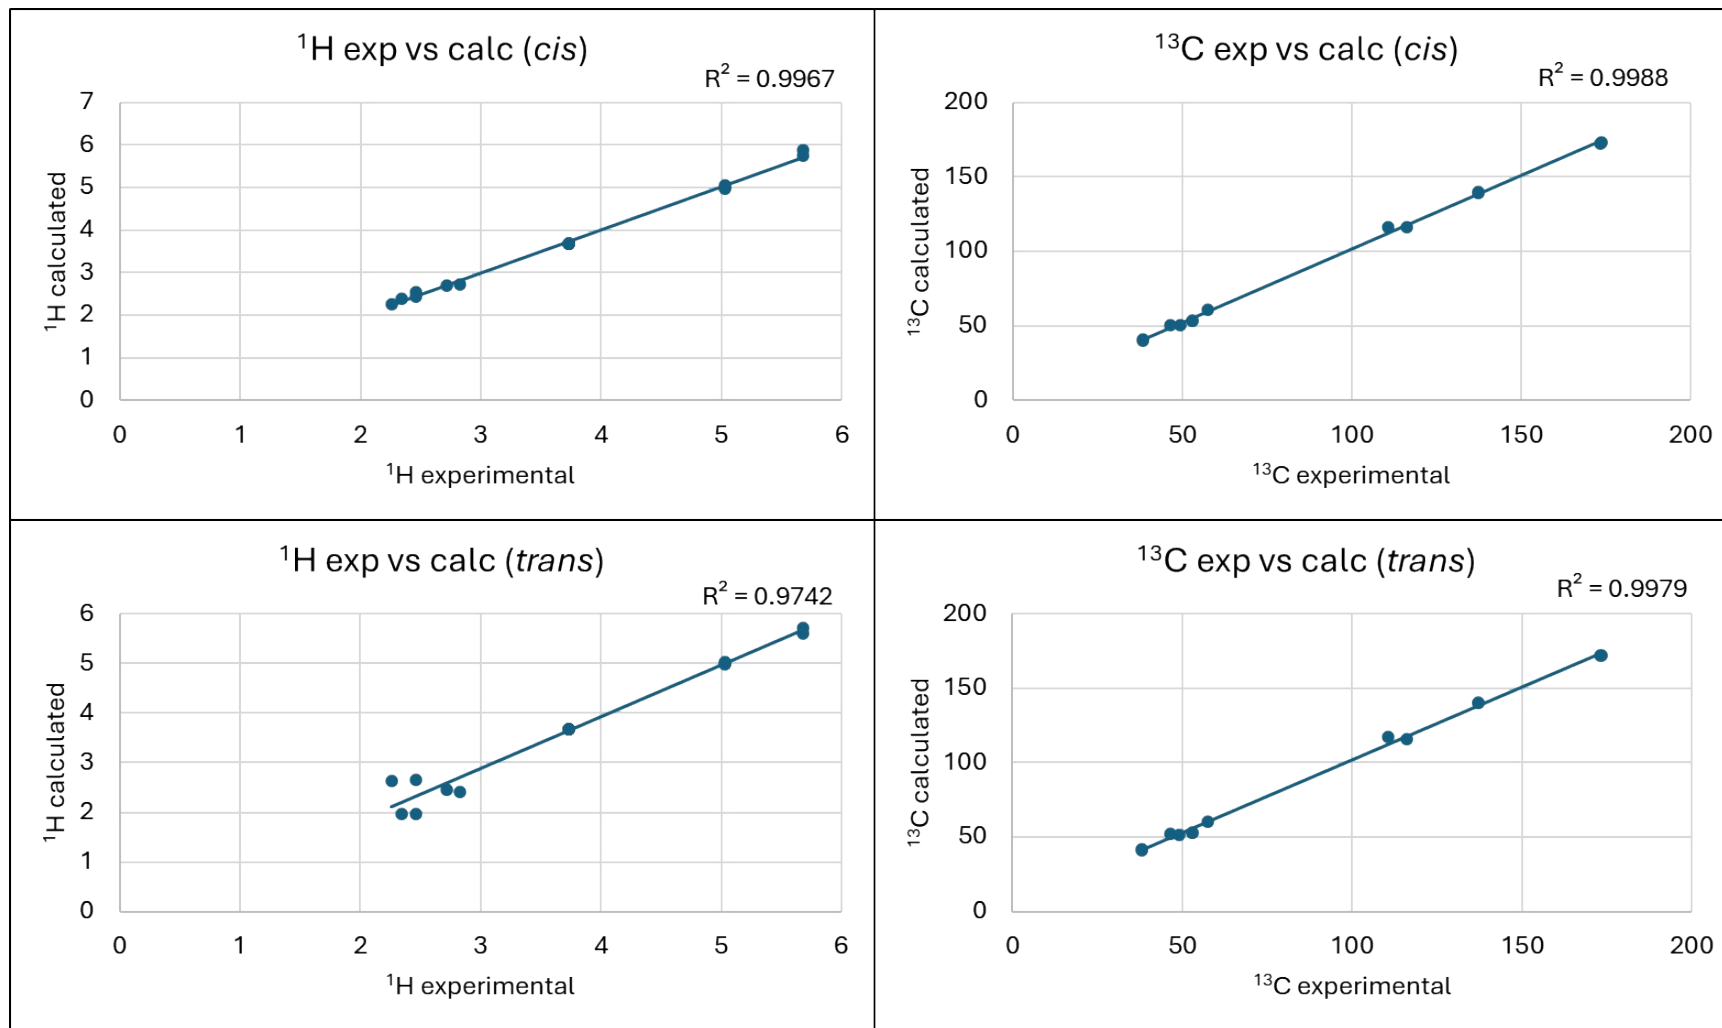

**Figure S12.**  $^1\text{H}$  and  $^{13}\text{C}$  experimental vs. calculated chemical shift plots for the *cis* and *trans* configurations of **3**.

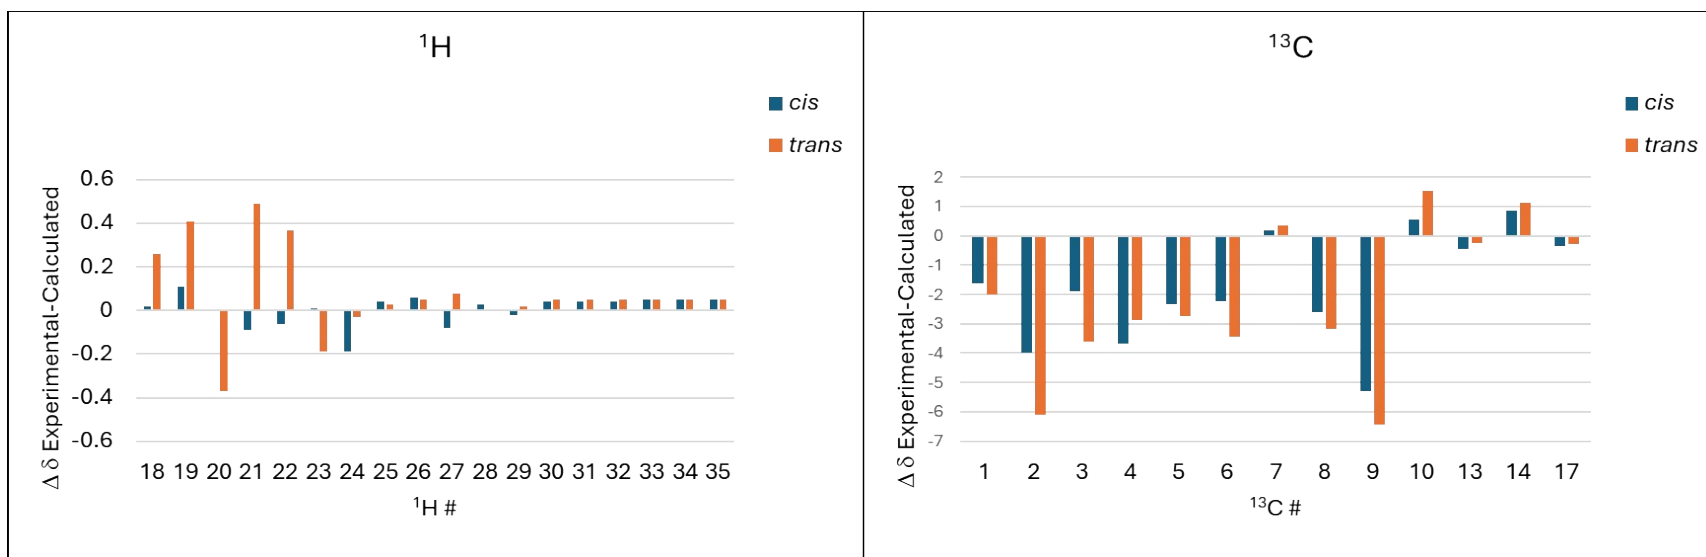

**Figure S13.**  $\Delta\delta$  for  $^1\text{H}$  and  $^{13}\text{C}$  experimental-calculated of **3**.

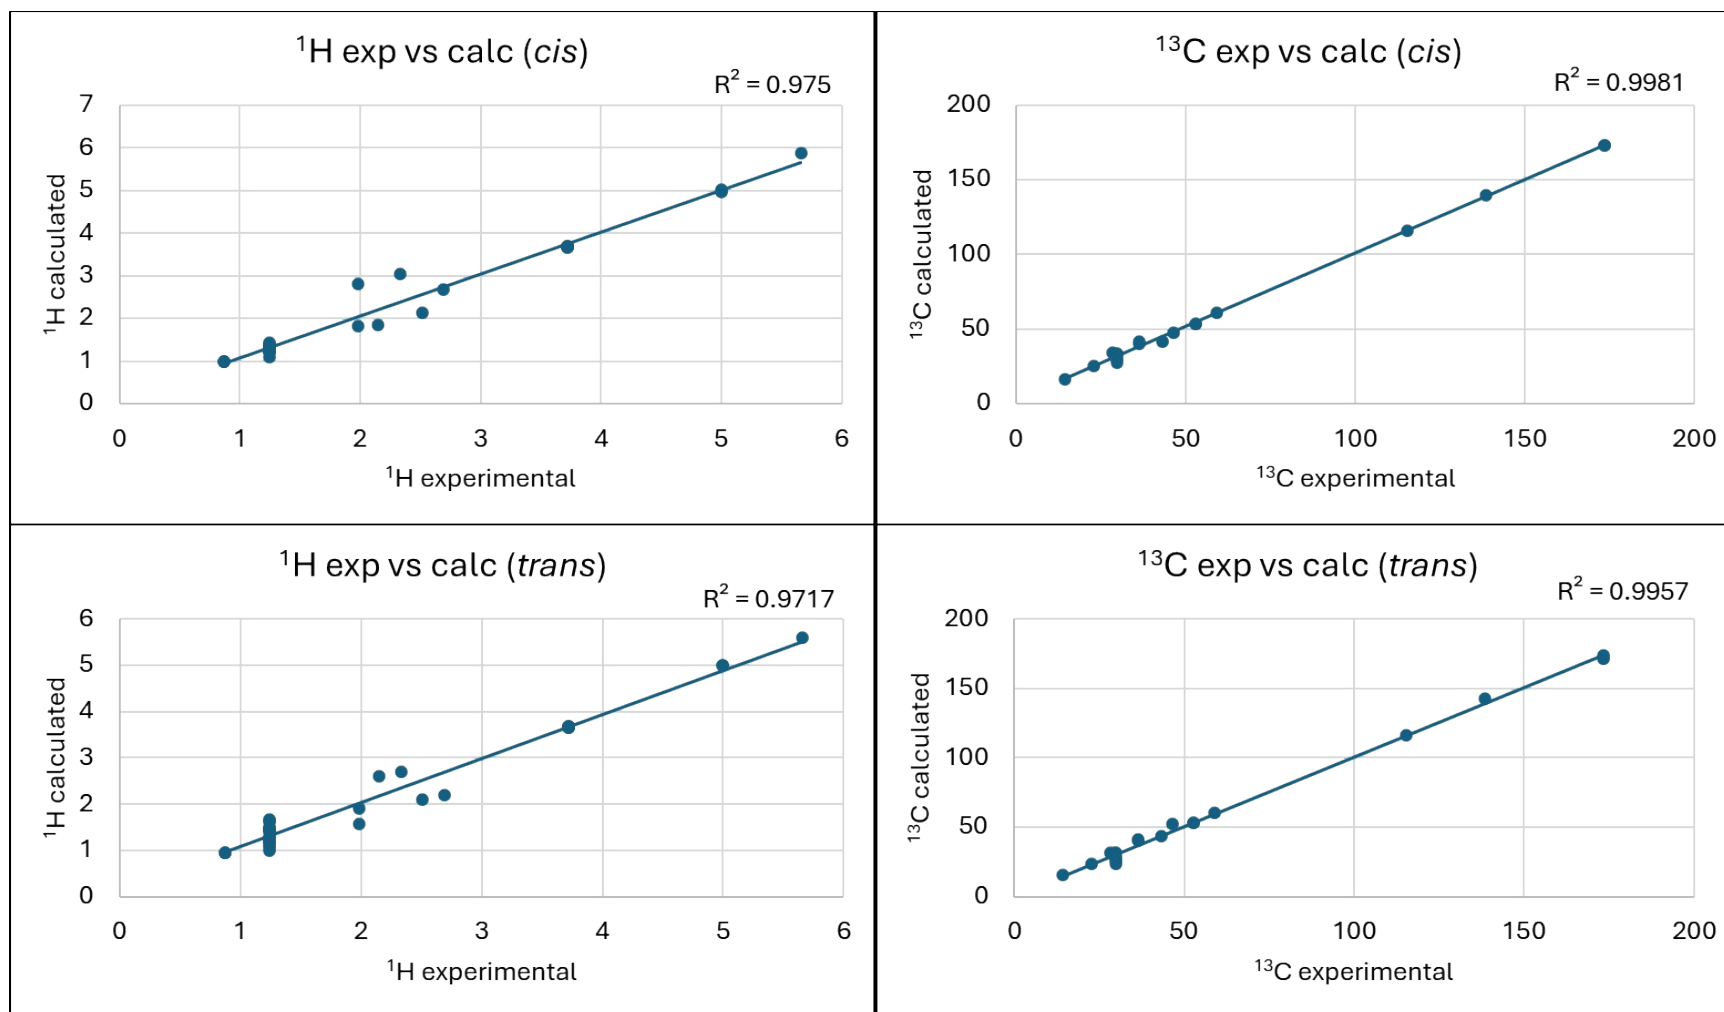

**Figure S14.**  $^1\text{H}$  and  $^{13}\text{C}$  experimental vs. calculated chemical shift plots for the *cis* and *trans* configurations of **4**.

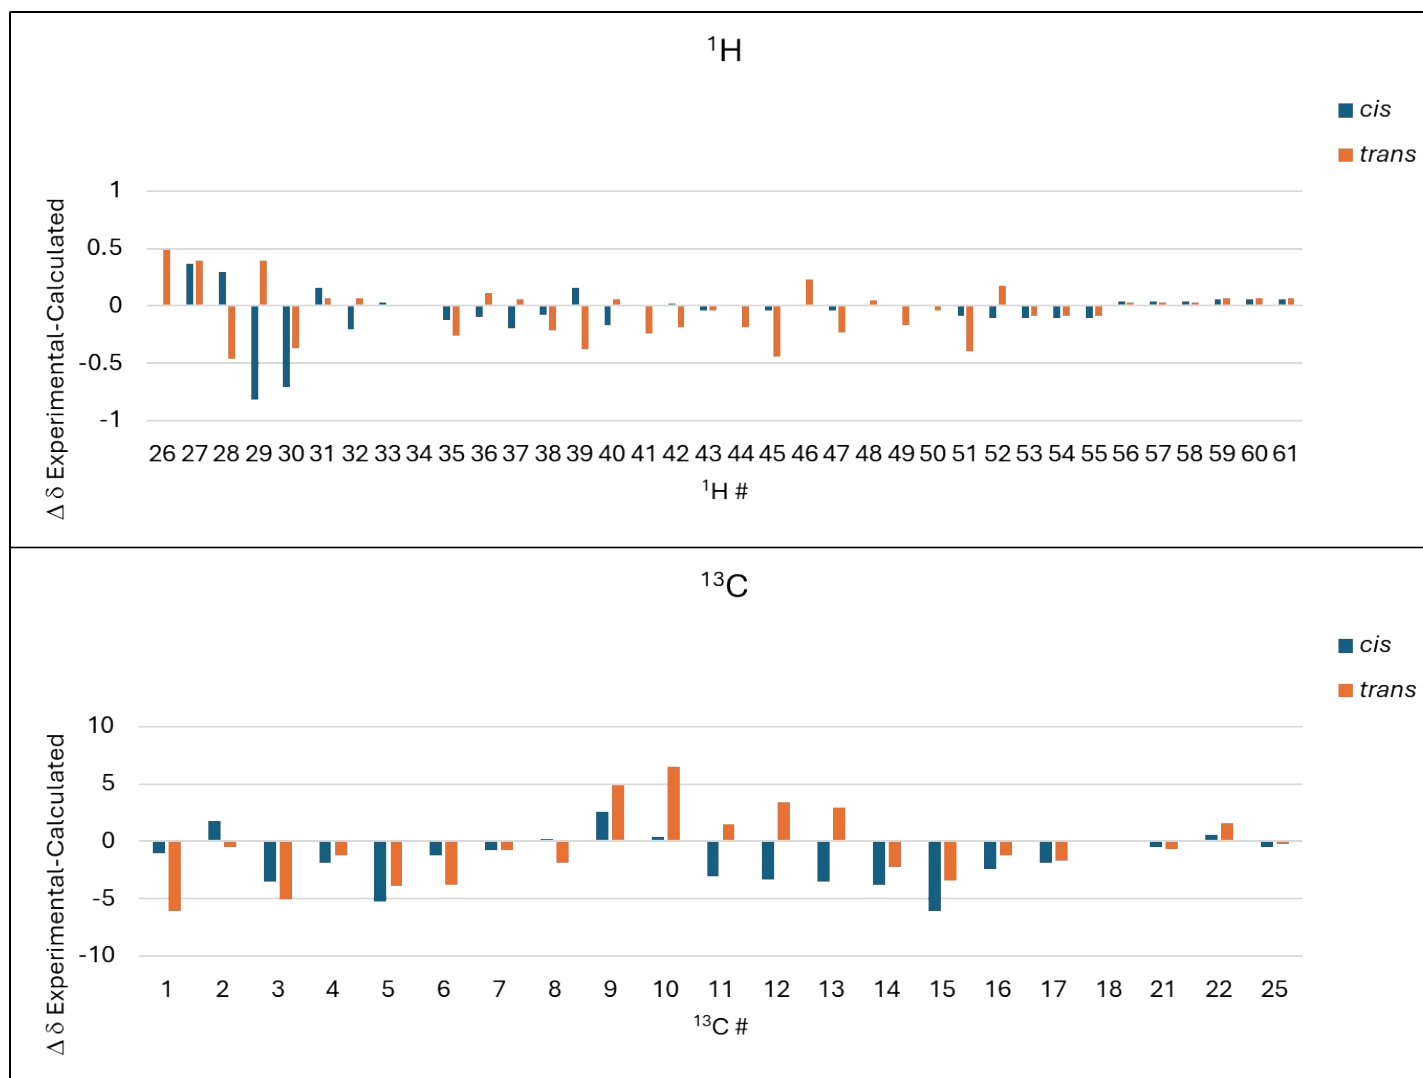

**Figure S15.**  $\Delta\delta$  for  $^1\text{H}$  and  $^{13}\text{C}$  experimental-calculated of **4**.

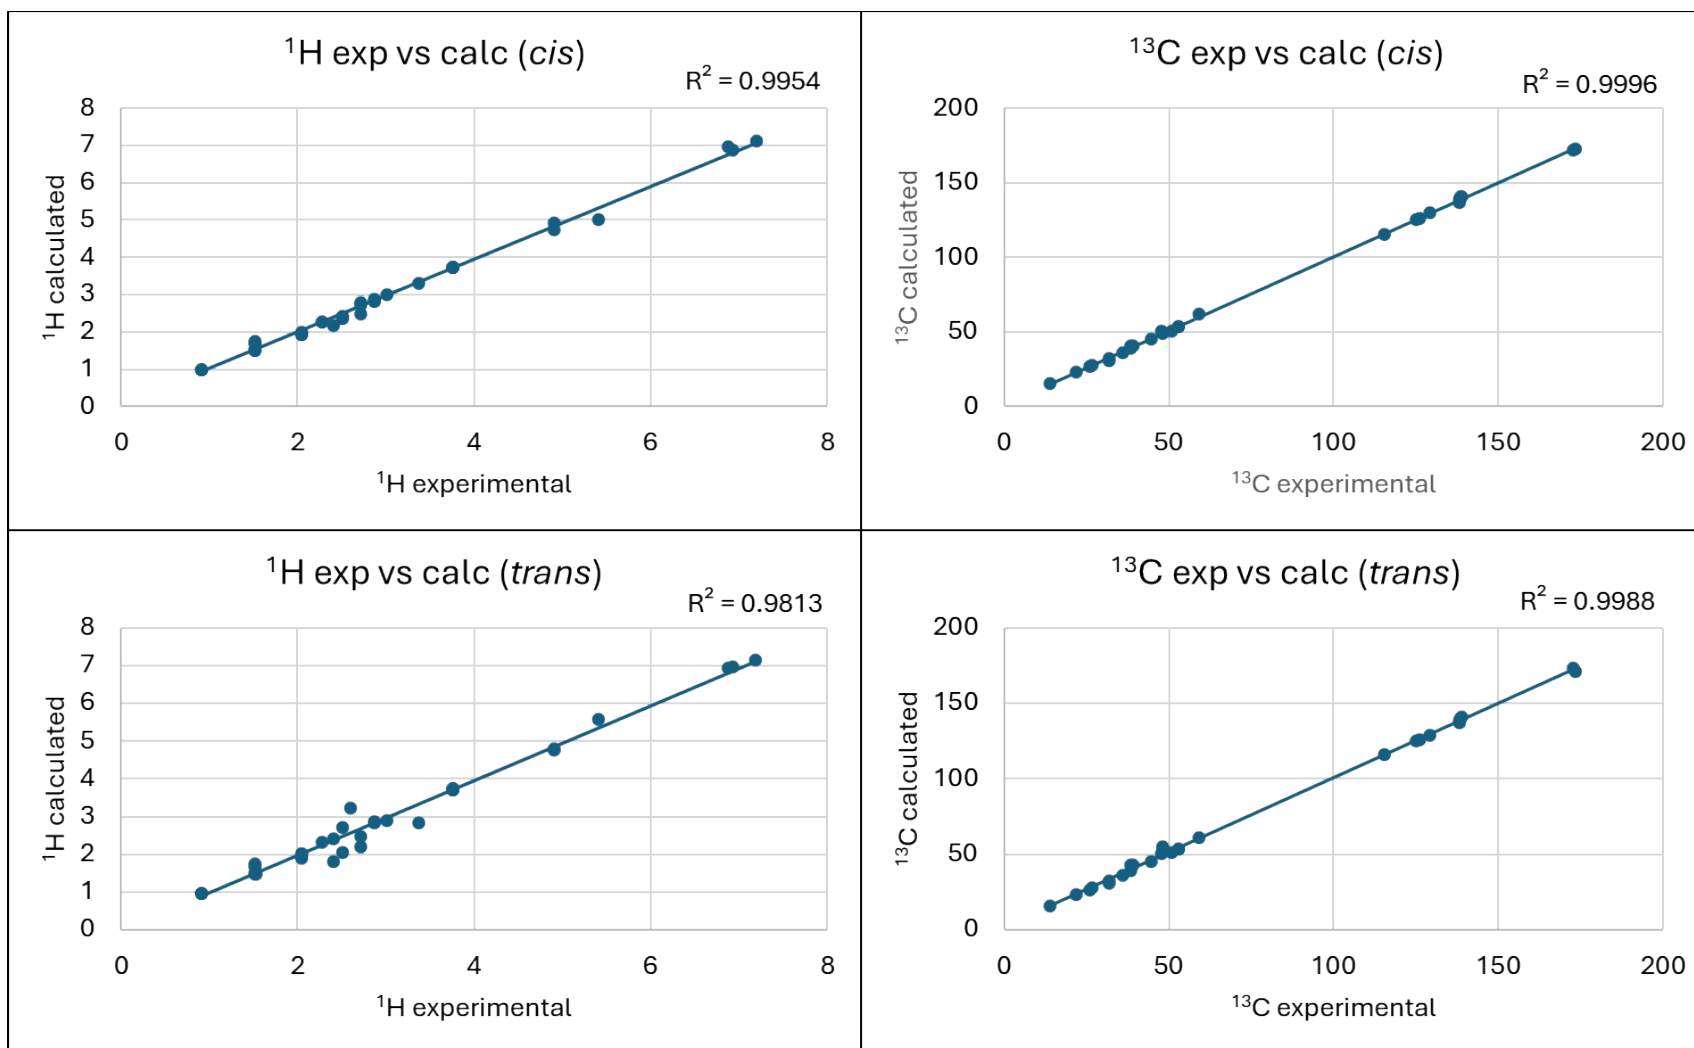

**Figure S16.** <sup>1</sup>H and <sup>13</sup>C experimental vs. calculated chemical shift plots for the *cis* and *trans* configurations of **5**.

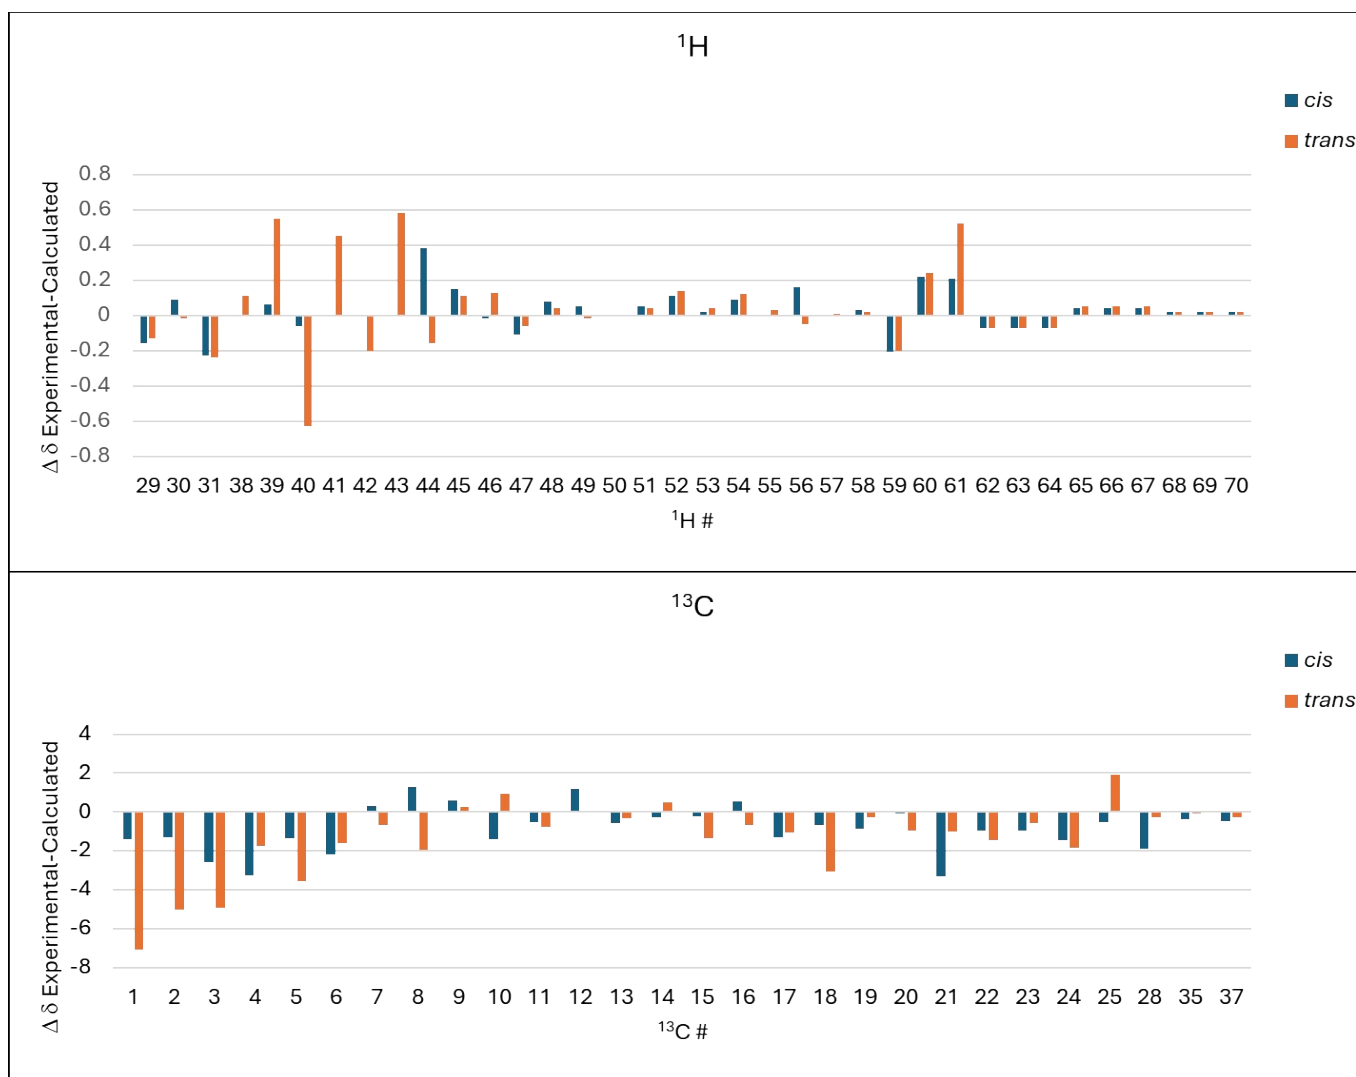

**Figure S17.**  $\Delta \delta$  for <sup>1</sup>H and <sup>13</sup>C experimental-calculated of **5**.

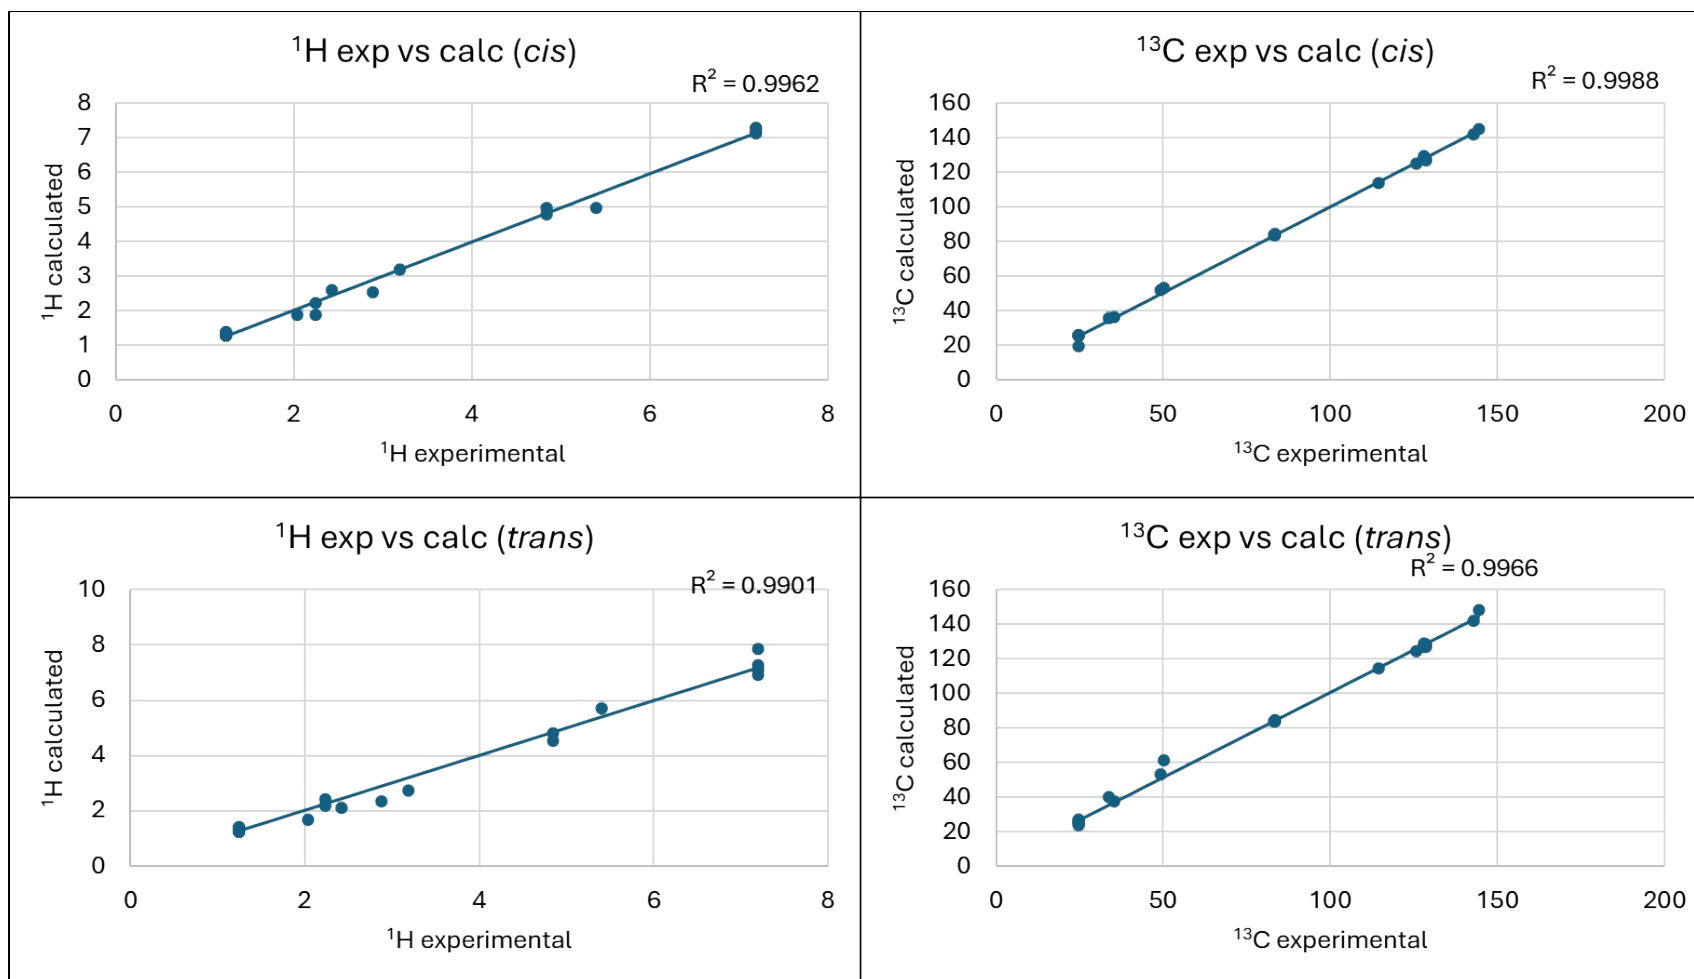

**Figure S18.**  $^1\text{H}$  and  $^{13}\text{C}$  experimental vs. calculated chemical shift plots for the *cis* and *trans* configurations of **6**.

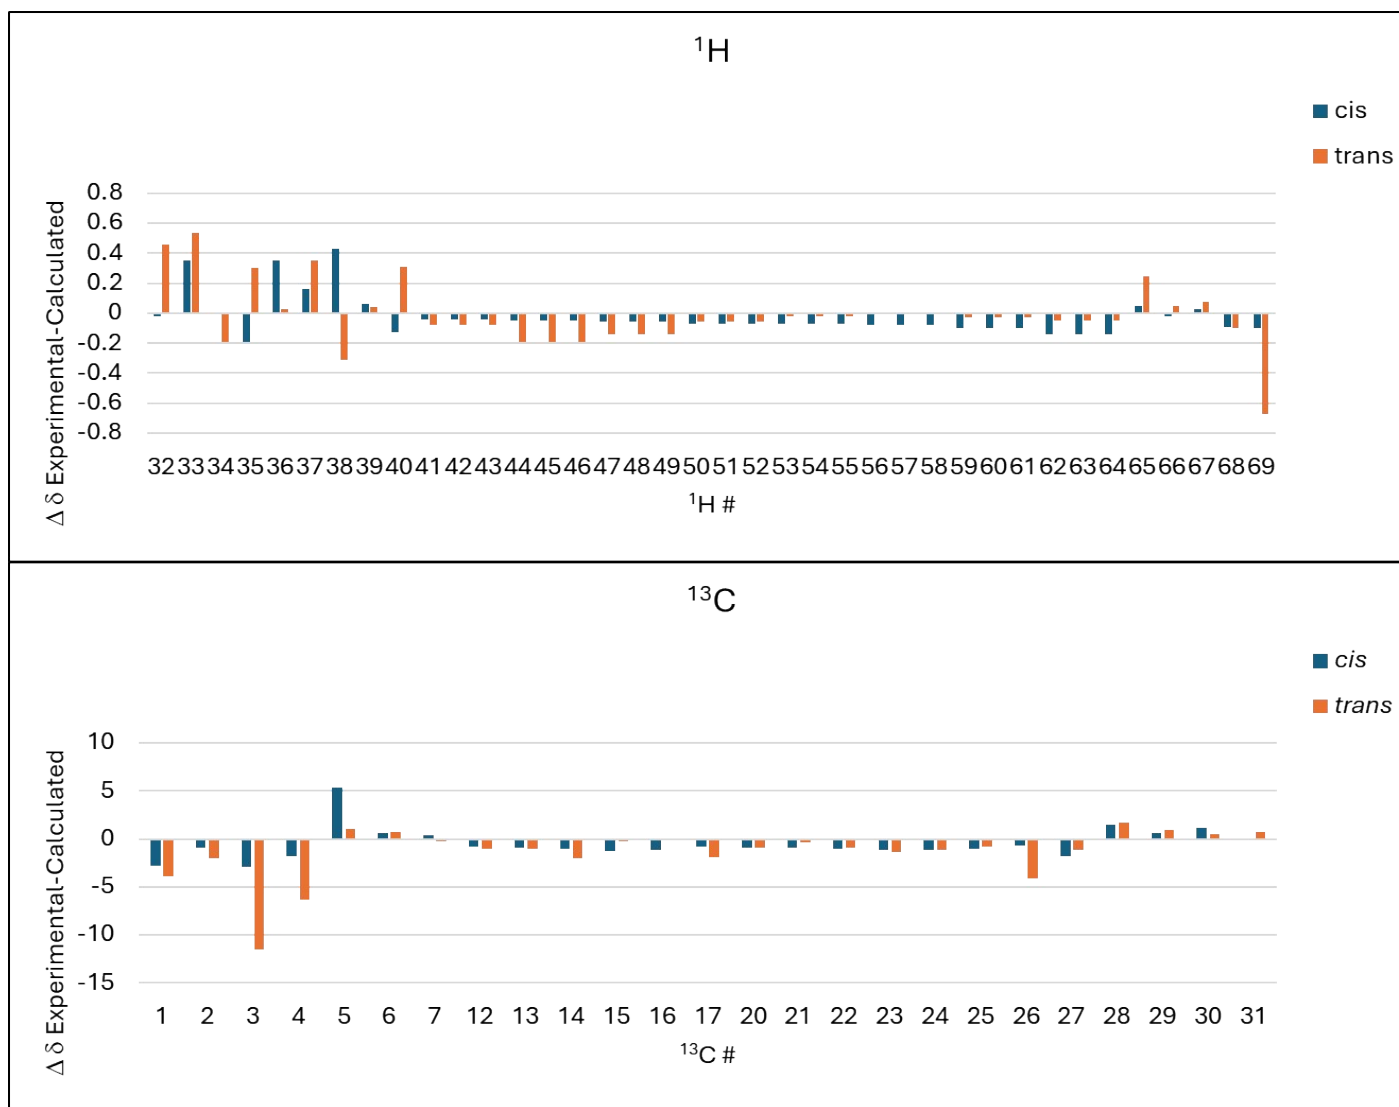

**Figure S19.**  $\Delta \delta$  for <sup>1</sup>H and <sup>13</sup>C experimental-calculated of **6**.

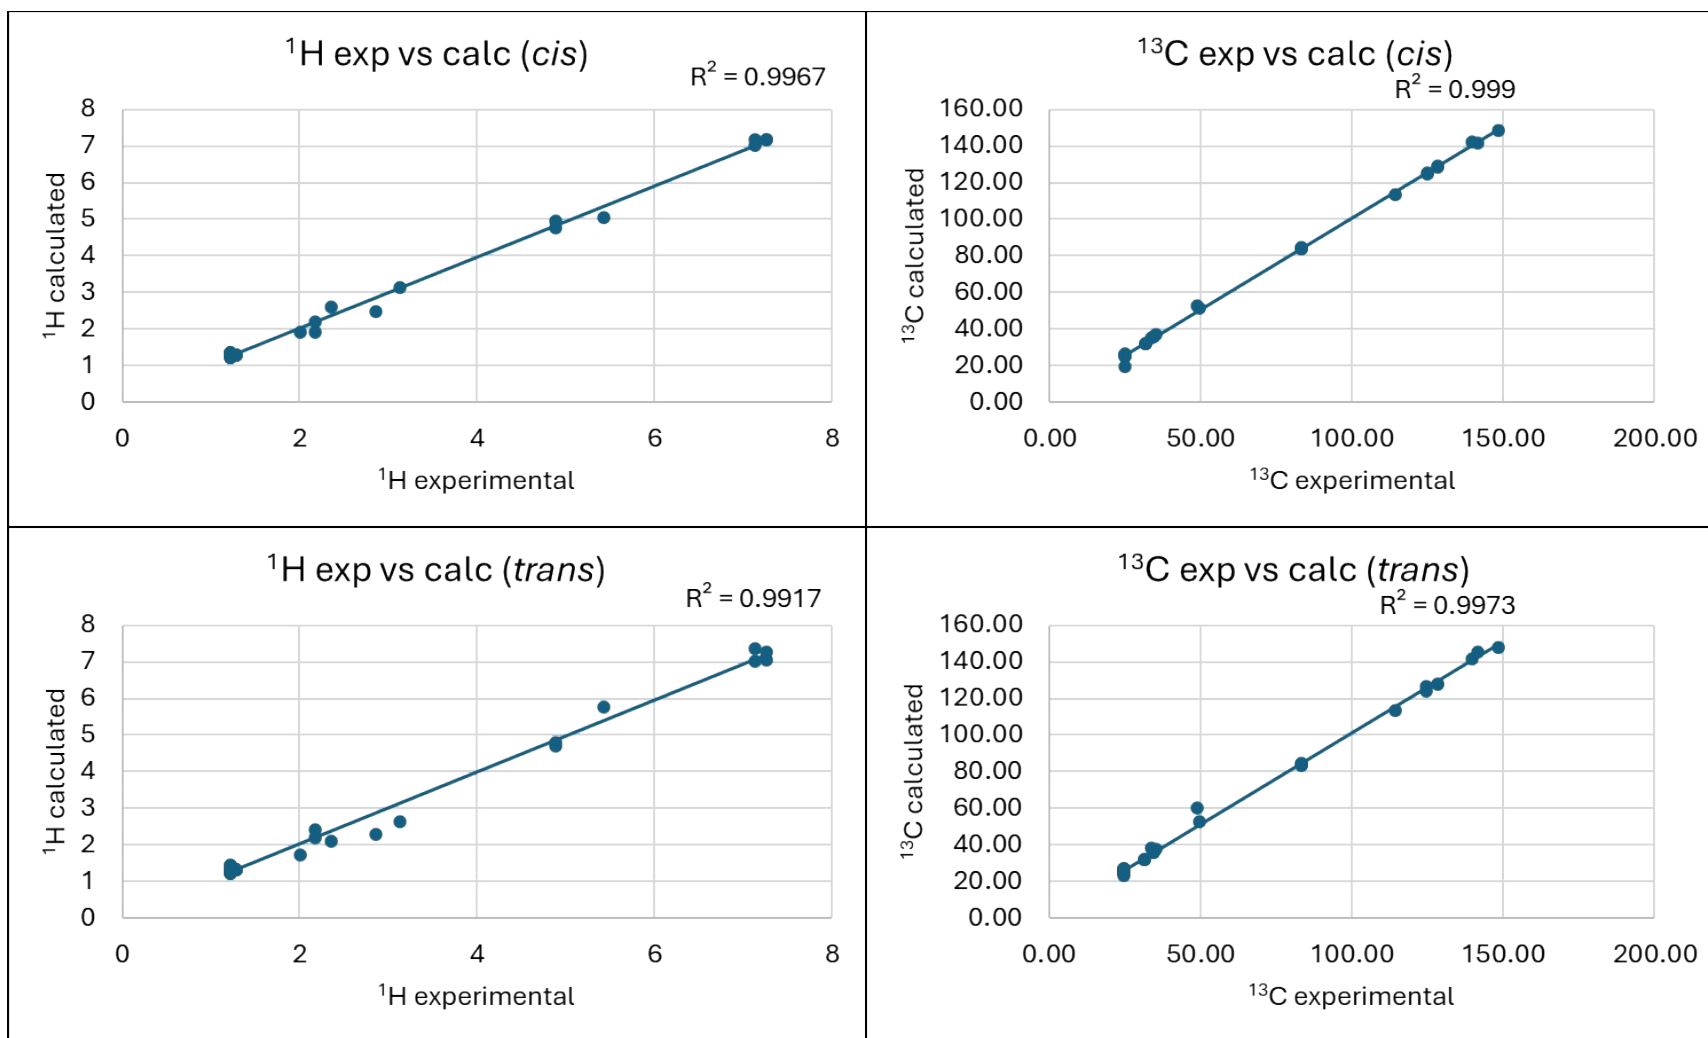

**Figure S20.**  $^1\text{H}$  and  $^{13}\text{C}$  experimental vs. calculated chemical shift plots for the *cis* and *trans* configurations of **7**.

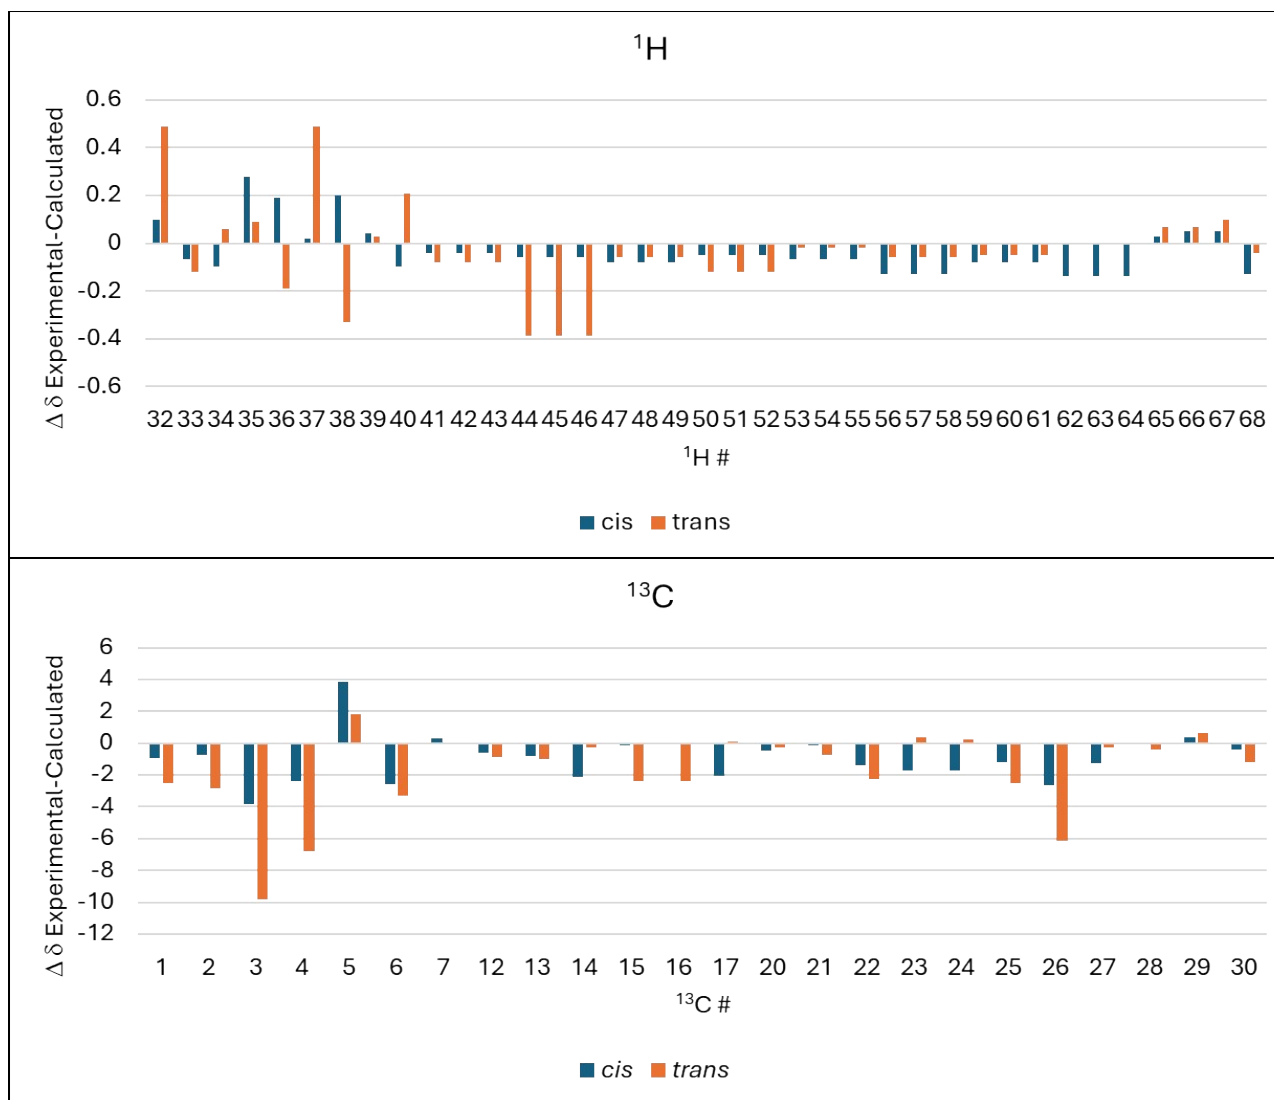

**Figure S21.**  $\Delta \delta$  for <sup>1</sup>H and <sup>13</sup>C experimental-calculated of 7.

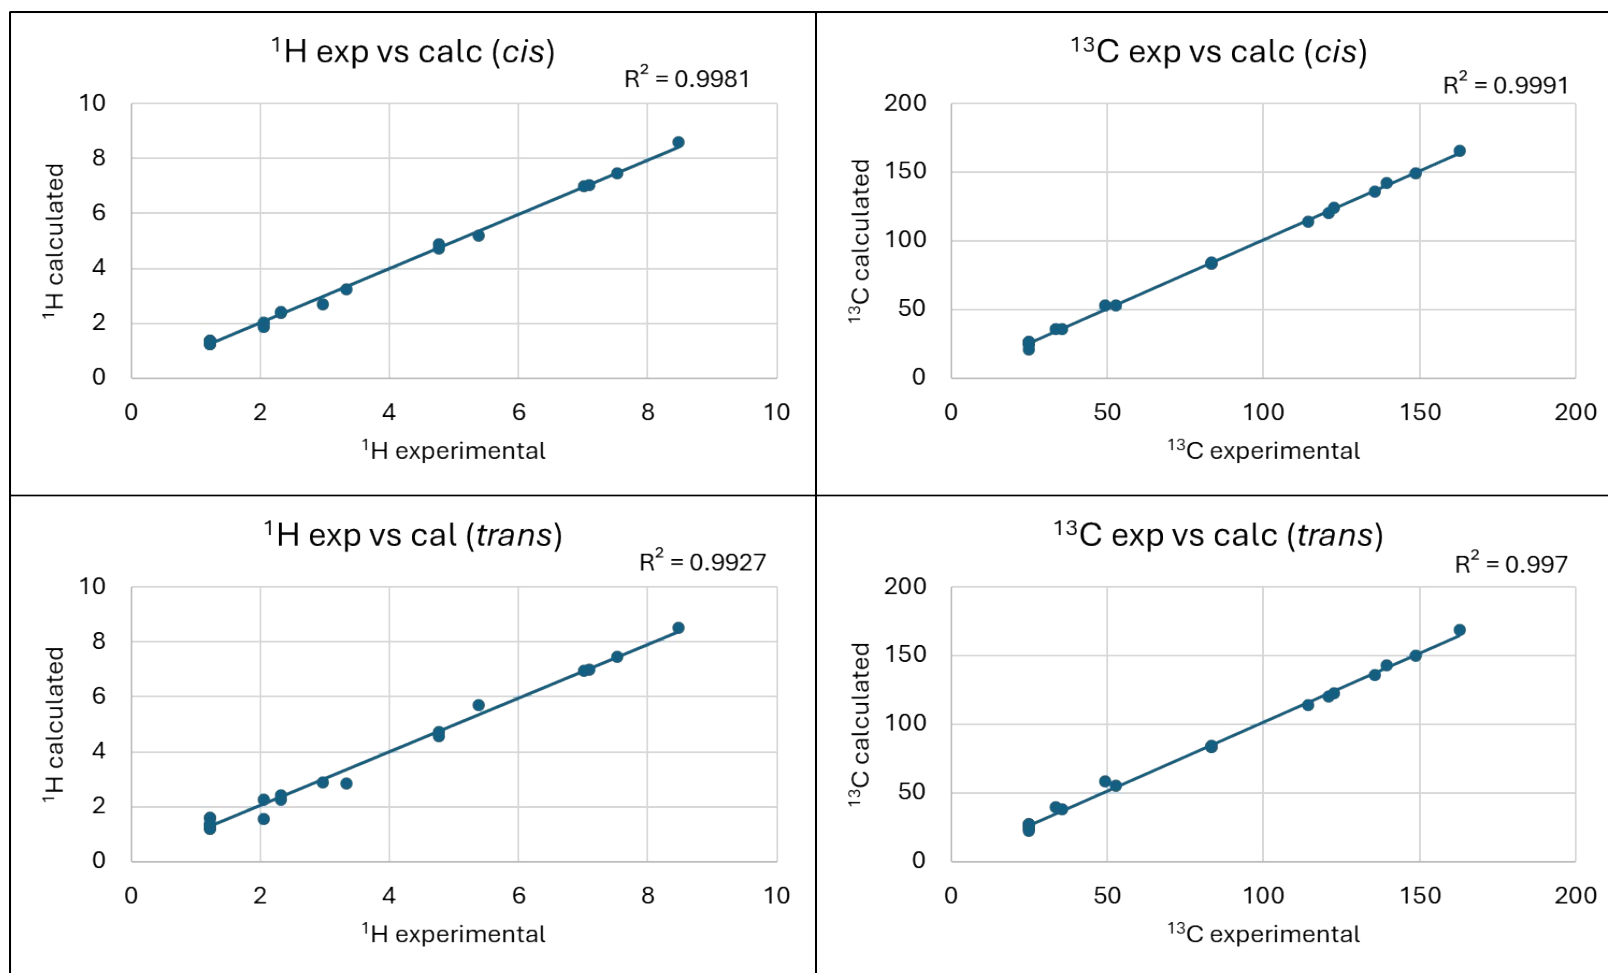

**Figure S22.**  $^1\text{H}$  and  $^{13}\text{C}$  experimental vs. calculated chemical shift plots for the *cis* and *trans* configurations of **8**.

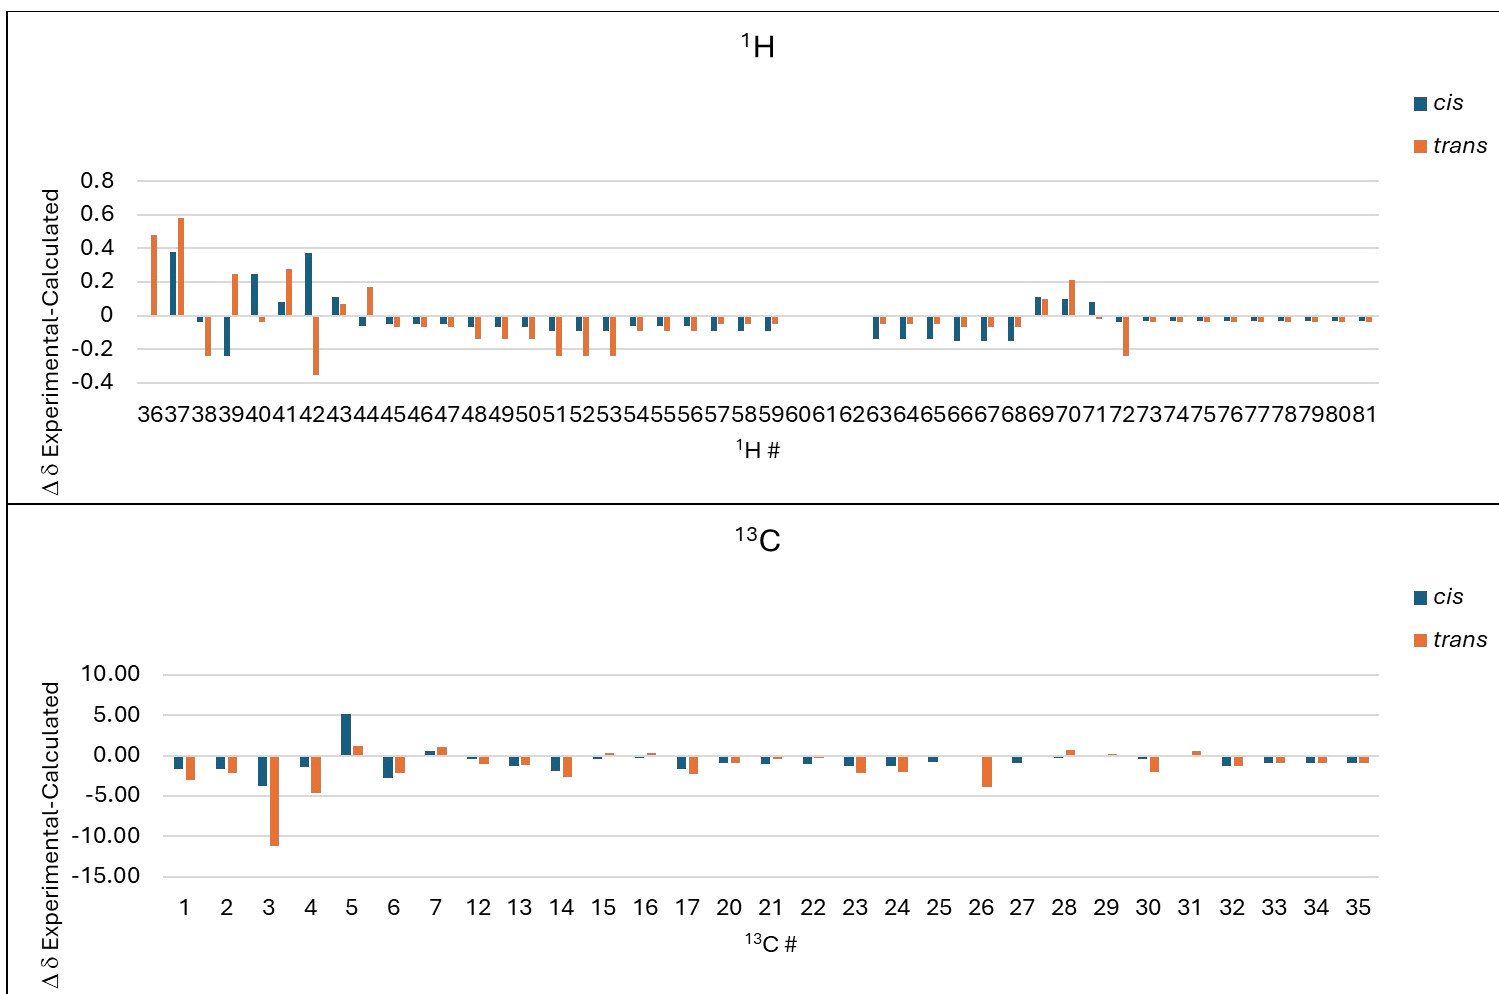

**Figure S23.**  $\Delta \delta$  for <sup>1</sup>H and <sup>13</sup>C experimental-calculated of **8**.

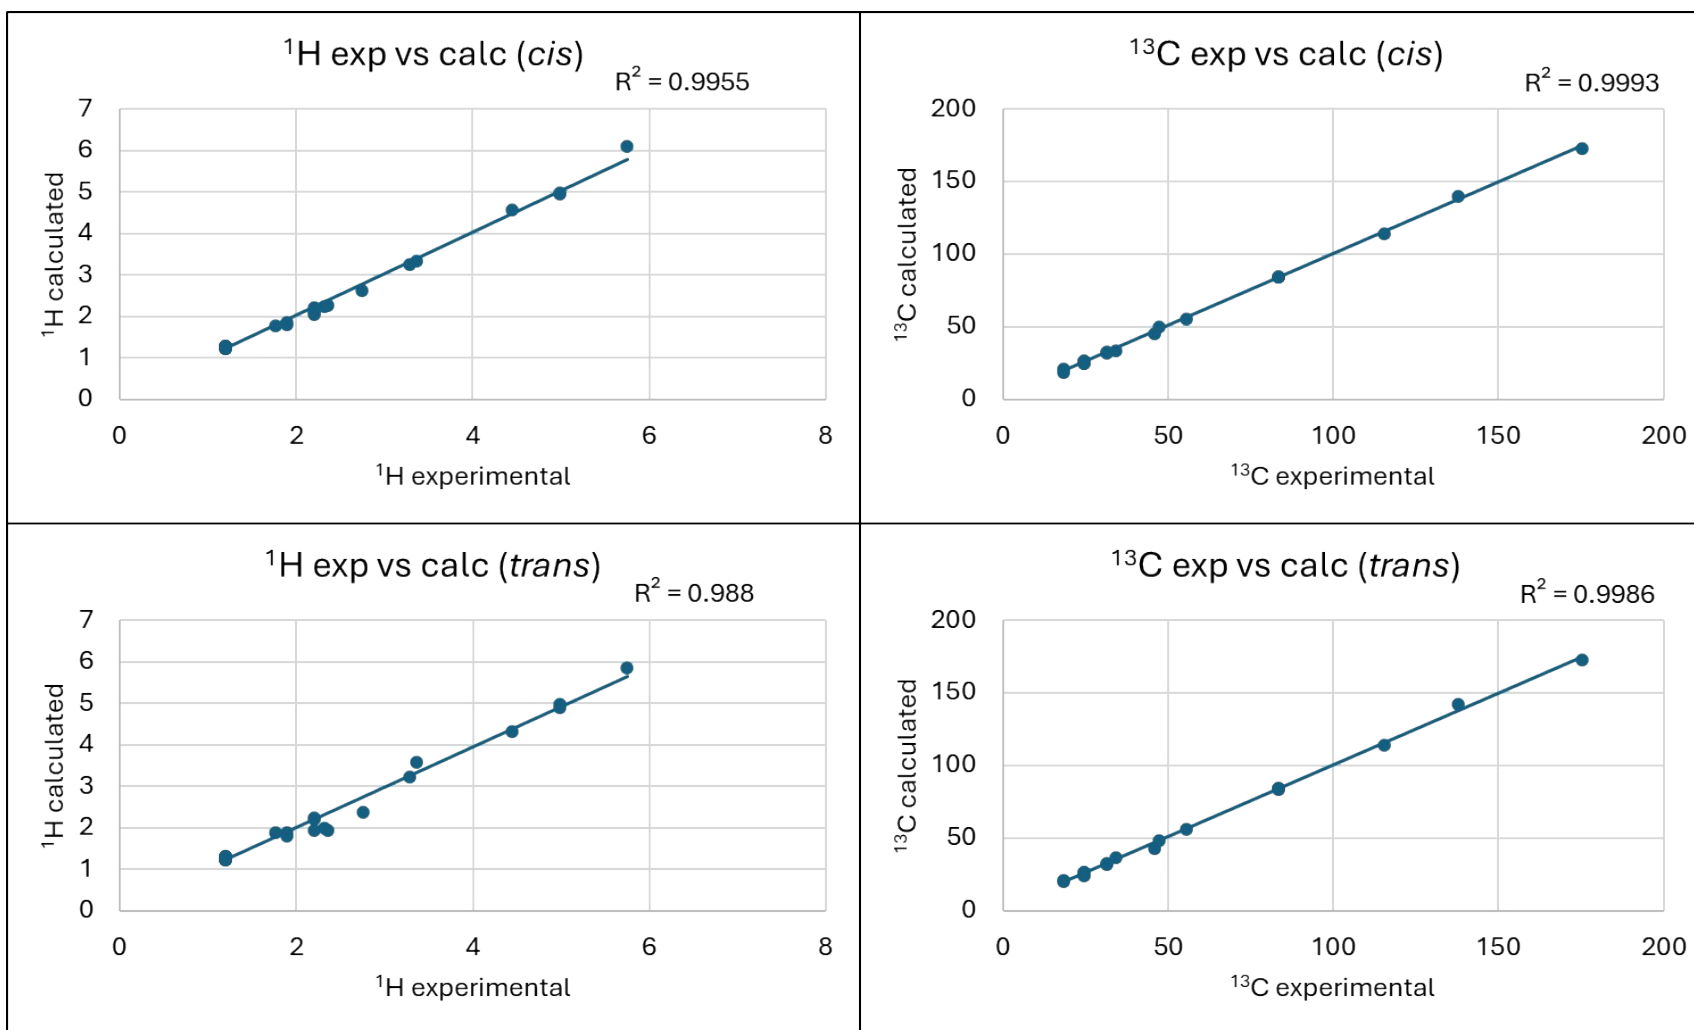

**Figure S24.**  $^1\text{H}$  and  $^{13}\text{C}$  experimental vs. calculated chemical shift plots for the *cis* and *trans* configurations of **9**.

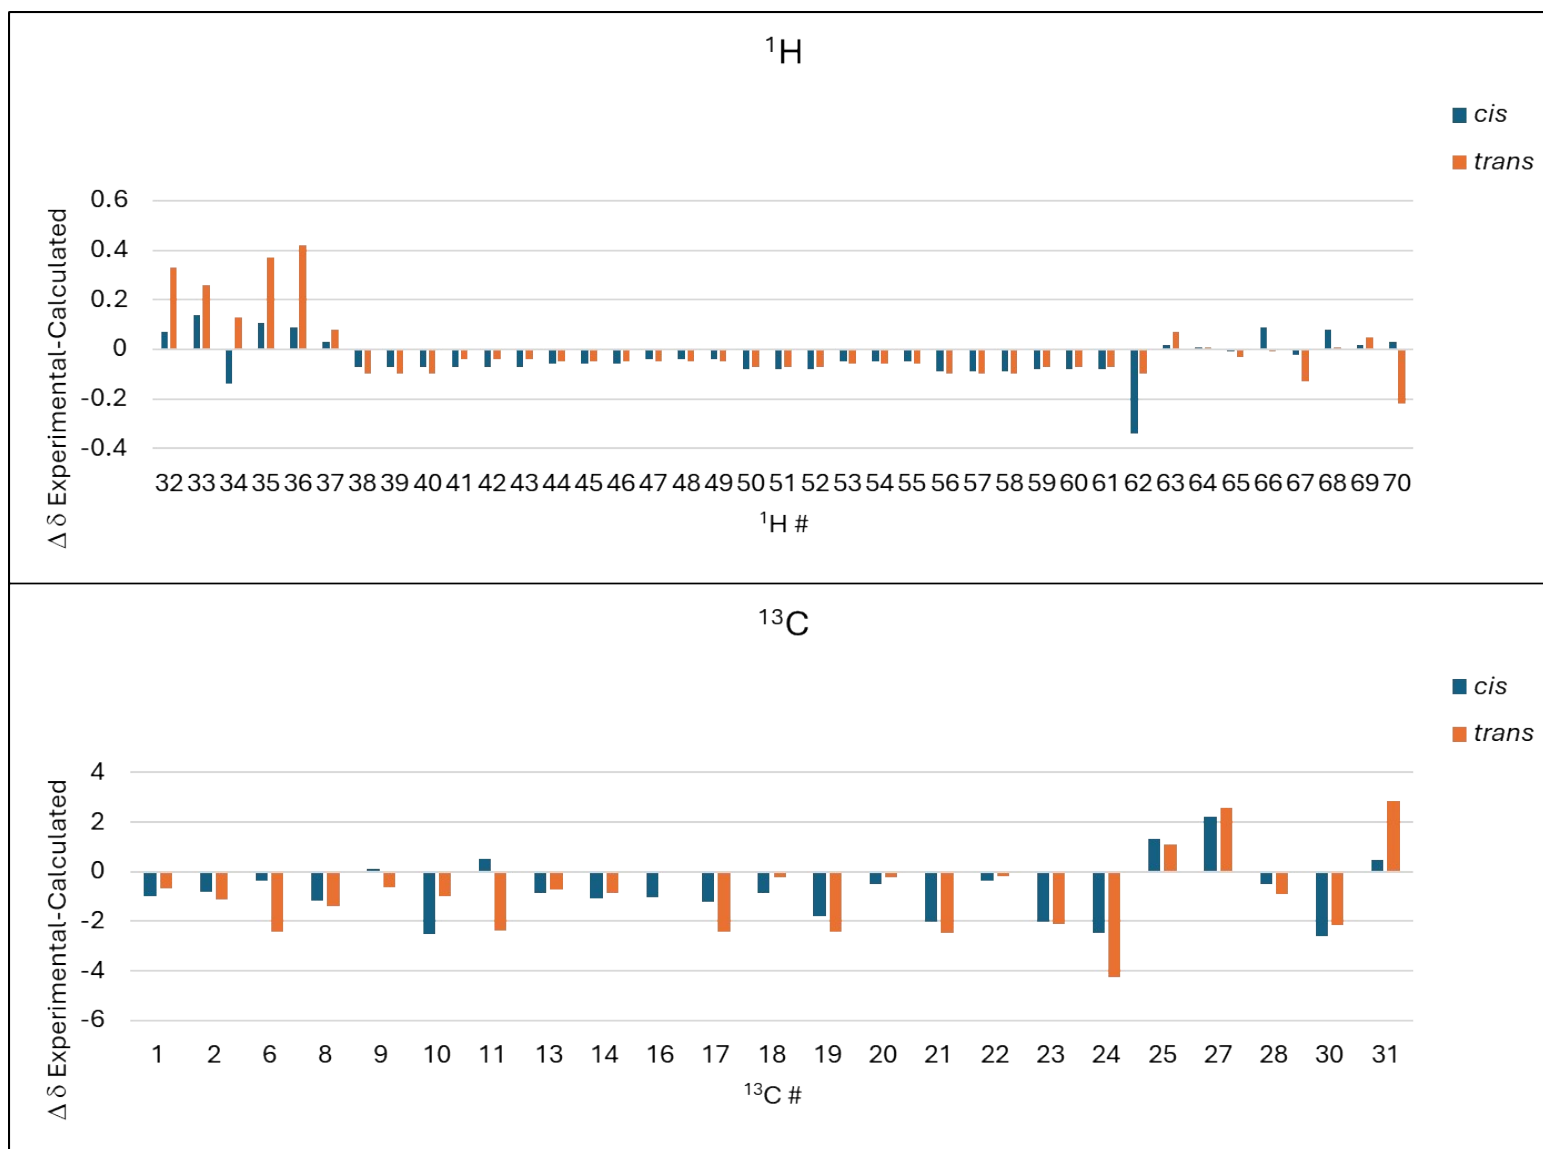

**Figure S25.**  $\Delta \delta$  for  $^1\text{H}$  and  $^{13}\text{C}$  experimental-calculated of **9**.

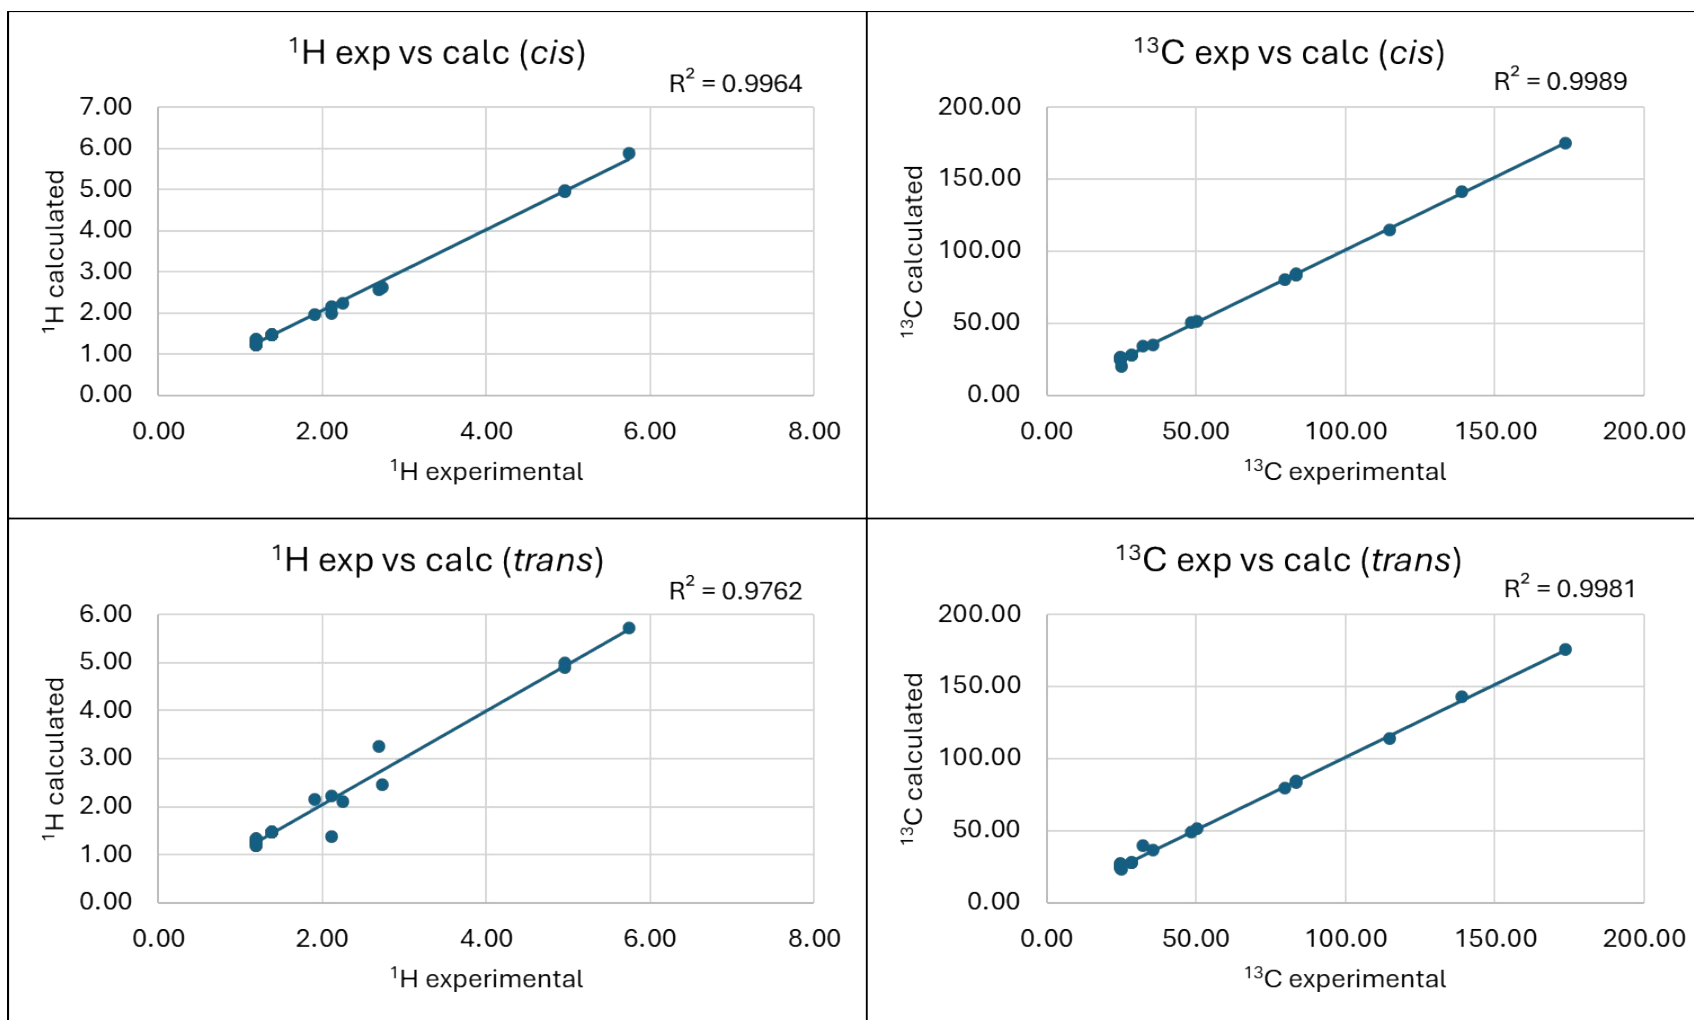

**Figure S26.**  $^1\text{H}$  and  $^{13}\text{C}$  experimental vs. calculated chemical shift plots for the *cis* and *trans* configurations of **10**.

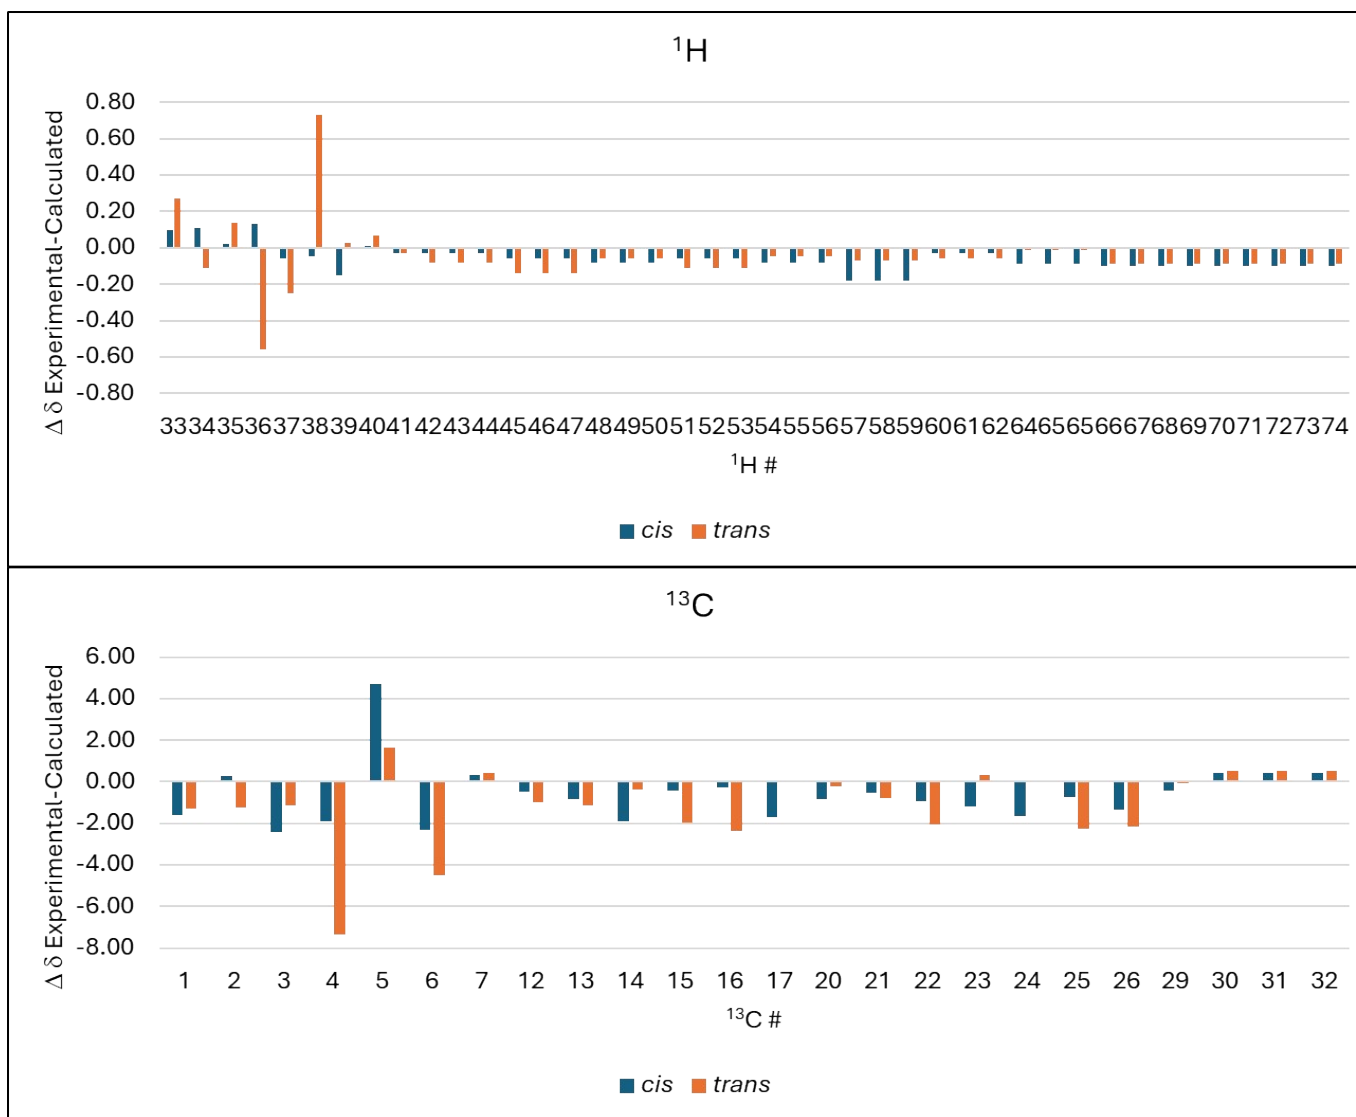

**Figure S27.**  $\Delta \delta$  for <sup>1</sup>H and <sup>13</sup>C experimental-calculated of **10**.

**Table S1.** <sup>1</sup>H RMSD and MAE values for 1-10.

| <b>Compound #</b> | <b>RMSD <i>cis</i></b> | <b>RMSD <i>trans</i></b> | <b>MAE <i>cis</i></b> | <b>MAE <i>trans</i></b> |
|-------------------|------------------------|--------------------------|-----------------------|-------------------------|
| <b>1</b>          | 0.25                   | 0.27                     | 0.15                  | 0.19                    |
| <b>2</b>          | 0.07                   | 0.31                     | 0.09                  | 0.21                    |
| <b>3</b>          | 0.07                   | 0.21                     | 0.05                  | 0.14                    |
| <b>4</b>          | 0.22                   | 0.23                     | 0.12                  | 0.18                    |
| <b>5</b>          | 0.12                   | 1.42                     | 0.08                  | 1.14                    |
| <b>6</b>          | 0.14                   | 0.21                     | 0.10                  | 0.14                    |
| <b>7</b>          | 0.10                   | 0.19                     | 0.09                  | 0.13                    |
| <b>8</b>          | 0.12                   | 0.17                     | 0.09                  | 0.12                    |
| <b>9</b>          | 0.09                   | 0.14                     | 0.07                  | 0.10                    |
| <b>10</b>         | 0.09                   | 0.17                     | 0.08                  | 0.11                    |

**Table S2.** <sup>13</sup>C RMSD and MAE values for 1-10.

| Compound # | RMSD <i>cis</i> | RMSD <i>trans</i> | MAE <i>cis</i> | MAE <i>trans</i> |
|------------|-----------------|-------------------|----------------|------------------|
| 1          | 2.43            | 3.47              | 2.09           | 2.79             |
| 2          | 1.69            | 2.93              | 1.26           | 2.18             |
| 3          | 2.52            | 3.25              | 2.01           | 2.61             |
| 4          | 2.69            | 3.17              | 2.12           | 2.56             |
| 5          | 0.23            | 2.31              | 0.15           | 1.58             |
| 6          | 1.68            | 3.06              | 1.32           | 1.88             |
| 7          | 1.73            | 3.14              | 1.34           | 2.06             |
| 8          | 1.61            | 2.73              | 1.20           | 1.74             |
| 9          | 1.43            | 1.86              | 1.21           | 1.53             |
| 10         | 1.54            | 2.14              | 1.18           | 1.42             |

# Cartesian Coordinates

In xyz format (unit: Ångstrom)

## Structure 1

Eopt = -3869.682378 a.u.

45 atoms

|    |           |           |           |
|----|-----------|-----------|-----------|
| Br | 2.785156  | 3.222085  | -0.967006 |
| C  | 1.734219  | 2.021082  | 0.256953  |
| C  | 0.646356  | 1.347068  | -0.481351 |
| C  | -0.647965 | 1.574219  | -0.227720 |
| C  | -1.769654 | 0.869294  | -0.928876 |
| C  | -2.603514 | -0.037840 | 0.016154  |
| C  | -3.236399 | 0.810256  | 1.127762  |
| O  | -4.099311 | 1.698207  | 0.612392  |
| C  | -4.768165 | 2.573900  | 1.551062  |
| O  | -2.984653 | 0.717575  | 2.313144  |
| C  | -3.740629 | -0.686637 | -0.784386 |
| O  | -4.583486 | -1.338917 | 0.029733  |
| C  | -5.695429 | -2.021083 | -0.597596 |
| O  | -3.859467 | -0.645948 | -1.993290 |
| C  | -1.719952 | -1.146203 | 0.662511  |
| C  | -1.043222 | -2.006930 | -0.350732 |
| H  | 1.374102  | 2.674095  | 1.050488  |
| H  | 2.488629  | 1.337618  | 0.639547  |
| H  | 0.936625  | 0.624370  | -1.240304 |
| H  | -0.913134 | 2.305164  | 0.537247  |
| H  | -1.373149 | 0.242505  | -1.730983 |
| H  | -2.443454 | 1.601310  | -1.384935 |
| H  | -5.405609 | 3.214405  | 0.942856  |
| H  | -4.035716 | 3.171791  | 2.097367  |
| H  | -5.369536 | 1.987774  | 2.249432  |

|   |           |           |           |
|---|-----------|-----------|-----------|
| H | -5.328750 | -2.780091 | -1.291831 |
| H | -6.327887 | -1.303953 | -1.125316 |
| H | -6.245480 | -2.486007 | 0.219576  |
| H | -2.365188 | -1.757413 | 1.305296  |
| H | -1.003837 | -0.651075 | 1.317823  |
| H | -1.673783 | -2.490731 | -1.094176 |
| C | 0.346909  | -2.239561 | -0.462158 |
| C | 0.842997  | -3.023914 | -1.546131 |
| C | 1.304746  | -1.719428 | 0.457858  |
| C | 2.201289  | -3.251869 | -1.715150 |
| H | 0.131698  | -3.436766 | -2.255825 |
| C | 2.657796  | -1.965265 | 0.275873  |
| H | 0.978886  | -1.126491 | 1.301576  |
| C | 3.129228  | -2.723556 | -0.810090 |
| H | 2.549682  | -3.844452 | -2.555405 |
| H | 4.191561  | -2.899186 | -0.941585 |
| C | 3.664166  | -1.397724 | 1.232522  |
| F | 3.106988  | -0.827658 | 2.328979  |
| F | 4.533787  | -2.343801 | 1.690353  |
| F | 4.442843  | -0.434987 | 0.652836  |

### **TS1-cis**

Eopt = -3869.667448

45 atoms

|   |          |           |           |
|---|----------|-----------|-----------|
| C | 0.407579 | -0.383573 | 1.434237  |
| C | 0.765733 | 1.111973  | -0.102061 |
| C | 1.779183 | 0.290698  | -0.859115 |
| C | 1.398755 | -1.386067 | 0.913420  |
| H | 0.768159 | 0.227455  | 2.255925  |
| H | 0.918990 | -2.111632 | 0.252317  |

|   |           |           |           |
|---|-----------|-----------|-----------|
| H | 2.496896  | 0.937869  | -1.372805 |
| H | 1.267030  | -0.304967 | -1.617763 |
| H | 1.149761  | 1.798793  | 0.651642  |
| C | -0.458033 | 1.426510  | -0.668465 |
| C | -1.400064 | 2.339450  | -0.035572 |
| H | -0.788154 | 0.900159  | -1.561219 |
| H | -2.441093 | 2.034224  | -0.108925 |
| H | -1.136166 | 2.619473  | 0.981018  |
| C | 2.510188  | -0.668341 | 0.104844  |
| H | 1.846714  | -1.941097 | 1.744925  |
| C | 3.445389  | 0.113638  | 1.039877  |
| O | 3.368795  | 0.141673  | 2.252780  |
| O | 4.371161  | 0.778054  | 0.334424  |
| C | 5.336837  | 1.544729  | 1.091981  |
| H | 5.988856  | 2.001742  | 0.348543  |
| H | 4.831355  | 2.313402  | 1.680488  |
| H | 5.908904  | 0.885590  | 1.748728  |
| C | 3.376387  | -1.727553 | -0.577222 |
| O | 4.202118  | -2.392127 | 0.025383  |
| O | 3.099854  | -1.880713 | -1.875115 |
| C | 3.834819  | -2.916536 | -2.572514 |
| H | 3.632035  | -3.890472 | -2.122161 |
| H | 3.469289  | -2.885729 | -3.598109 |
| H | 4.905490  | -2.704216 | -2.540795 |
| C | -1.024973 | -0.626707 | 1.464115  |
| C | -1.675532 | -1.441563 | 0.516447  |
| C | -1.826237 | 0.081107  | 2.385790  |
| C | -3.066199 | -1.537062 | 0.505654  |
| H | -1.098605 | -1.975707 | -0.228990 |
| C | -3.214780 | -0.027616 | 2.373966  |

|    |           |           |           |
|----|-----------|-----------|-----------|
| H  | -1.342103 | 0.724270  | 3.115185  |
| C  | -3.850916 | -0.840339 | 1.433523  |
| Br | -1.445674 | 4.162785  | -1.007831 |
| H  | -4.931793 | -0.923656 | 1.417402  |
| H  | -3.807549 | 0.527377  | 3.094493  |
| C  | -3.730569 | -2.438971 | -0.491249 |
| F  | -4.971058 | -2.010059 | -0.844738 |
| F  | -3.022566 | -2.567260 | -1.644373 |
| F  | -3.897514 | -3.710248 | -0.012170 |

**TS1-trans**

Eopt = -3869.665423

45 atoms

|   |           |           |           |
|---|-----------|-----------|-----------|
| C | -0.654837 | -0.992126 | 0.016565  |
| C | -0.638233 | 1.153940  | -0.375413 |
| C | -2.138558 | 1.353215  | -0.266692 |
| C | -2.019974 | -1.120855 | -0.588780 |
| H | -0.629117 | -0.972824 | 1.105908  |
| H | -2.464174 | -2.099015 | -0.369921 |
| H | -2.491718 | 1.776927  | -1.212314 |
| H | -2.380743 | 2.060516  | 0.527551  |
| H | -0.268372 | 0.965242  | -1.383679 |
| C | 0.257654  | 1.711990  | 0.513368  |
| C | 1.692350  | 1.742897  | 0.241683  |
| H | -0.086587 | 2.083930  | 1.475577  |
| H | 2.322801  | 1.477956  | 1.087517  |
| H | 1.988202  | 1.212536  | -0.659457 |
| H | -1.986869 | -1.010109 | -1.673625 |
| C | -2.891402 | 0.014029  | -0.005232 |
| C | -4.292917 | 0.115777  | -0.601742 |
| O | -5.202206 | 0.720617  | -0.059547 |

|    |           |           |           |
|----|-----------|-----------|-----------|
| O  | -4.396795 | -0.474885 | -1.795516 |
| C  | -5.674987 | -0.353325 | -2.466882 |
| H  | -5.558086 | -0.894481 | -3.405005 |
| H  | -6.463427 | -0.803579 | -1.860386 |
| H  | -5.901692 | 0.697970  | -2.656430 |
| C  | -3.079155 | -0.200918 | 1.507394  |
| O  | -2.743156 | 0.575816  | 2.379440  |
| O  | -3.659271 | -1.385114 | 1.745981  |
| C  | -3.901265 | -1.719942 | 3.132844  |
| H  | -4.372615 | -2.701840 | 3.114251  |
| H  | -2.957653 | -1.759656 | 3.681292  |
| H  | -4.568355 | -0.984219 | 3.587287  |
| Br | 2.318380  | 3.676359  | -0.118482 |
| C  | 0.567911  | -1.472281 | -0.582892 |
| C  | 1.731889  | -1.511263 | 0.216740  |
| C  | 0.694254  | -1.806604 | -1.951384 |
| C  | 2.960041  | -1.869757 | -0.332337 |
| H  | 1.657802  | -1.253664 | 1.268052  |
| C  | 1.927443  | -2.167256 | -2.487452 |
| H  | -0.176456 | -1.781918 | -2.597784 |
| C  | 3.075379  | -2.197009 | -1.689067 |
| H  | 2.001734  | -2.424878 | -3.539437 |
| H  | 4.034427  | -2.470473 | -2.113952 |
| C  | 4.180616  | -1.822684 | 0.536406  |
| F  | 5.181738  | -2.625119 | 0.091781  |
| F  | 4.711828  | -0.563295 | 0.610082  |
| F  | 3.927740  | -2.192633 | 1.821005  |

## Structure 2

Eopt = -3532.610973

42 atoms

|    |           |           |           |
|----|-----------|-----------|-----------|
| Br | -5.130343 | 0.362991  | 0.328396  |
| C  | -4.355608 | -1.452681 | -0.132833 |
| C  | -3.130145 | -1.293511 | -0.944500 |
| C  | -1.908563 | -1.573111 | -0.477436 |
| C  | -0.653840 | -1.413893 | -1.280047 |
| C  | 0.347810  | -0.367469 | -0.707306 |
| C  | -0.391582 | 0.963202  | -0.560664 |
| O  | -1.079030 | 1.022310  | 0.586835  |
| C  | -1.926816 | 2.175017  | 0.758357  |
| O  | -0.420752 | 1.827068  | -1.414420 |
| C  | 0.919183  | -0.856823 | 0.623029  |
| O  | 1.500746  | 0.137818  | 1.304007  |
| C  | 2.205334  | -0.237746 | 2.502761  |
| O  | 0.911543  | -2.016123 | 0.990191  |
| C  | 1.519582  | -0.217182 | -1.738358 |
| C  | 2.597777  | 0.739371  | -1.356840 |
| H  | -5.175485 | -1.939663 | -0.659443 |
| H  | -4.177465 | -1.926951 | 0.830984  |
| H  | -3.258765 | -0.922667 | -1.960403 |
| H  | -1.795533 | -1.925992 | 0.546209  |
| H  | -0.901354 | -1.114809 | -2.303522 |
| H  | -0.113347 | -2.365830 | -1.327984 |
| H  | -2.407977 | 2.039580  | 1.726278  |
| H  | -2.678786 | 2.213497  | -0.031201 |
| H  | -1.327398 | 3.088752  | 0.752434  |
| H  | 1.513505  | -0.662409 | 3.234632  |
| H  | 2.641689  | 0.685669  | 2.883519  |
| H  | 2.990732  | -0.960410 | 2.270819  |
| H  | 1.050262  | 0.121735  | -2.667583 |

|   |          |           |           |
|---|----------|-----------|-----------|
| H | 1.914908 | -1.220982 | -1.920253 |
| H | 2.392187 | 1.795364  | -1.508440 |
| C | 3.828966 | 0.398951  | -0.748267 |
| C | 4.202070 | -0.939279 | -0.428520 |
| C | 4.751280 | 1.430307  | -0.403661 |
| C | 5.411099 | -1.214517 | 0.196141  |
| H | 3.530312 | -1.758092 | -0.663589 |
| C | 5.956082 | 1.143549  | 0.219179  |
| H | 4.488806 | 2.459690  | -0.635054 |
| C | 6.298798 | -0.181388 | 0.526519  |
| H | 5.668188 | -2.243946 | 0.431851  |
| H | 6.636845 | 1.952130  | 0.472298  |
| H | 7.242042 | -0.404709 | 1.016351  |

**TS2-cis**

Eopt = -3532.601385

42 atoms

|   |           |           |           |
|---|-----------|-----------|-----------|
| C | -0.306641 | 1.174420  | 0.514617  |
| C | 0.285886  | -0.899865 | 0.193729  |
| C | -1.026535 | -1.356642 | -0.400429 |
| C | -1.541846 | 1.053575  | -0.328529 |
| H | -0.466137 | 1.071979  | 1.587006  |
| H | -1.305330 | 1.146005  | -1.389342 |
| H | -1.298430 | -2.343521 | -0.015591 |
| H | -0.924105 | -1.432387 | -1.487399 |
| H | 0.404490  | -1.017248 | 1.268241  |
| C | 1.434251  | -0.873426 | -0.574504 |
| C | 2.743042  | -0.572474 | -0.004685 |
| H | 1.363219  | -0.959522 | -1.656663 |
| H | 3.338840  | 0.124182  | -0.590259 |
| H | 2.714255  | -0.285847 | 1.043039  |

|    |           |           |           |
|----|-----------|-----------|-----------|
| C  | -2.157589 | -0.342741 | -0.091733 |
| H  | -2.263463 | 1.841664  | -0.082203 |
| C  | -2.624543 | -0.484200 | 1.364567  |
| O  | -2.236194 | -1.328198 | 2.148673  |
| O  | -3.519511 | 0.464892  | 1.671276  |
| C  | -4.053177 | 0.441530  | 3.015813  |
| H  | -3.249091 | 0.570918  | 3.743488  |
| H  | -4.748894 | 1.278391  | 3.064491  |
| H  | -4.574947 | -0.500633 | 3.197835  |
| C  | -3.362949 | -0.668300 | -0.970771 |
| O  | -4.166290 | -1.545007 | -0.701121 |
| O  | -3.409150 | 0.067494  | -2.085422 |
| C  | -4.478763 | -0.235309 | -3.014310 |
| H  | -5.448105 | -0.083078 | -2.535176 |
| H  | -4.346876 | 0.462637  | -3.840160 |
| H  | -4.391972 | -1.265714 | -3.365543 |
| C  | 0.817084  | 2.026502  | 0.175451  |
| C  | 1.695729  | 2.447616  | 1.198795  |
| C  | 1.144681  | 2.366781  | -1.155884 |
| C  | 2.844890  | 3.180180  | 0.908967  |
| H  | 1.465377  | 2.186619  | 2.228655  |
| C  | 2.295236  | 3.099204  | -1.443855 |
| H  | 0.506180  | 2.041133  | -1.970296 |
| C  | 3.152741  | 3.510672  | -0.416227 |
| H  | 3.503693  | 3.490679  | 1.715153  |
| Br | 3.960597  | -2.235001 | 0.003249  |
| H  | 4.050743  | 4.076530  | -0.646091 |
| H  | 2.529821  | 3.343670  | -2.476214 |

**TS2-trans**

Eopt = -3532.599870

42 atoms

|   |           |           |           |
|---|-----------|-----------|-----------|
| C | -0.142908 | 1.323544  | -0.689675 |
| C | 0.355519  | -0.717591 | -0.050311 |
| C | -1.038755 | -1.186929 | -0.368923 |
| C | -1.392900 | 1.285646  | 0.132254  |
| H | -0.267063 | 1.085456  | -1.743247 |
| H | -2.084631 | 2.082422  | -0.161858 |
| H | -1.273088 | -2.092773 | 0.197330  |
| H | -1.090371 | -1.444961 | -1.430842 |
| H | 0.525627  | -0.361857 | 0.965546  |
| C | 1.459560  | -1.108650 | -0.769835 |
| C | 2.812809  | -0.772225 | -0.343218 |
| H | 1.337238  | -1.597756 | -1.734295 |
| H | 3.472452  | -0.446485 | -1.143430 |
| H | 2.859033  | -0.101951 | 0.511413  |
| H | -1.157341 | 1.439248  | 1.188228  |
| C | -2.099857 | -0.093761 | -0.031344 |
| C | -2.832361 | -0.405412 | 1.276140  |
| O | -2.536099 | -1.282059 | 2.064867  |
| O | -3.836123 | 0.464219  | 1.466055  |
| C | -4.596904 | 0.321929  | 2.689011  |
| H | -3.948005 | 0.464759  | 3.555859  |
| H | -5.355628 | 1.102659  | 2.648756  |
| H | -5.065123 | -0.663894 | 2.729322  |
| C | -3.124103 | -0.058201 | -1.166909 |
| O | -3.234196 | 0.828092  | -1.991846 |
| O | -3.867800 | -1.174924 | -1.163011 |
| C | -4.850492 | -1.305303 | -2.217570 |
| H | -4.358293 | -1.314764 | -3.192559 |
| H | -5.347219 | -2.257054 | -2.032530 |

|    |           |           |           |
|----|-----------|-----------|-----------|
| H  | -5.568462 | -0.483885 | -2.167910 |
| Br | 3.828044  | -2.452682 | 0.320094  |
| C  | 1.020745  | 2.115821  | -0.375421 |
| C  | 2.026965  | 2.270257  | -1.360972 |
| C  | 1.264152  | 2.665262  | 0.905973  |
| C  | 3.213896  | 2.941911  | -1.081500 |
| H  | 1.862003  | 1.849172  | -2.349095 |
| C  | 2.453570  | 3.336547  | 1.180554  |
| H  | 0.522696  | 2.560284  | 1.691136  |
| C  | 3.437357  | 3.478305  | 0.192835  |
| H  | 3.969029  | 3.045711  | -1.855826 |
| H  | 2.617963  | 3.749540  | 2.171989  |
| H  | 4.363608  | 4.000460  | 0.413658  |

#### Structure 4

Eopt = -1665.054984

59 atoms

|   |          |           |           |
|---|----------|-----------|-----------|
| C | 2.061108 | -1.658431 | -1.058046 |
| C | 2.656071 | -0.357465 | -0.409525 |
| C | 2.455006 | 0.929100  | -1.270305 |
| C | 1.155714 | 1.037936  | -2.014219 |
| C | 0.615528 | -1.901072 | -0.760956 |
| H | 2.243473 | -1.607201 | -2.135400 |
| H | 2.652683 | -2.495351 | -0.669097 |
| H | 2.637294 | 1.799363  | -0.638351 |
| H | 3.246136 | 0.919261  | -2.031396 |
| H | 1.000696 | 0.290948  | -2.787208 |
| C | 1.888059 | -1.129946 | 3.151736  |
| O | 2.407521 | -1.167289 | 1.797189  |
| O | 1.297579 | 0.725713  | 1.315663  |

|   |           |           |           |
|---|-----------|-----------|-----------|
| C | 6.093015  | 0.410140  | 0.818289  |
| O | 4.864244  | -1.315148 | -0.837875 |
| O | 4.658733  | 0.408781  | 0.601759  |
| C | 0.230965  | 2.001340  | -1.918607 |
| H | -0.607639 | 1.979455  | -2.612002 |
| C | 0.250313  | 3.148564  | -0.955179 |
| H | 0.592875  | 4.075865  | -1.429727 |
| C | -0.512212 | -1.762208 | -1.726176 |
| H | 0.364706  | -2.187856 | 0.258655  |
| H | 0.870110  | 2.972123  | -0.075813 |
| S | -1.446917 | 3.648111  | -0.399278 |
| C | -2.079827 | 2.157007  | 0.233008  |
| C | -3.590931 | 0.664116  | 0.945906  |
| C | -2.306467 | 0.130549  | 1.146606  |
| N | -3.399887 | 1.917854  | 0.368357  |
| N | -1.404557 | 1.092889  | 0.692984  |
| H | -4.137686 | 2.546050  | 0.065564  |
| H | -0.383076 | 1.020003  | 0.769899  |
| C | -2.116655 | -1.134163 | 1.700989  |
| C | -4.744032 | -0.037737 | 1.291847  |
| C | -4.555824 | -1.302292 | 1.848287  |
| H | -5.423736 | -1.889440 | 2.130724  |
| C | -3.267650 | -1.839295 | 2.049162  |
| H | -3.168669 | -2.829036 | 2.483137  |
| H | -5.731666 | 0.379629  | 1.130160  |
| H | -1.125249 | -1.542963 | 1.850775  |
| H | 6.610485  | 0.608088  | -0.122622 |
| H | 6.271434  | 1.212742  | 1.532307  |
| H | 6.406288  | -0.550897 | 1.231219  |
| H | 2.251053  | -0.233869 | 3.659144  |

|   |           |           |           |
|---|-----------|-----------|-----------|
| H | 0.797140  | -1.142303 | 3.133423  |
| H | 2.277104  | -2.028052 | 3.628551  |
| C | 2.042975  | -0.185615 | 0.978504  |
| C | 4.172811  | -0.506678 | -0.242205 |
| H | -1.037225 | -0.811054 | -1.543028 |
| H | -0.128628 | -1.697958 | -2.752798 |
| C | -1.539027 | -2.905604 | -1.631694 |
| H | -1.862860 | -3.011302 | -0.587665 |
| H | -1.045424 | -3.847452 | -1.904188 |
| C | -2.772398 | -2.697269 | -2.521966 |
| H | -2.448774 | -2.555465 | -3.562782 |
| H | -3.372946 | -3.616165 | -2.508814 |
| C | -3.656706 | -1.521392 | -2.092638 |
| H | -4.550066 | -1.450941 | -2.724413 |
| H | -3.130086 | -0.563497 | -2.164093 |
| H | -3.989604 | -1.641672 | -1.055906 |

**TS4-cis**

Eopt = -1665.048813

59 atoms

|   |           |           |           |
|---|-----------|-----------|-----------|
| C | 2.043533  | -1.113229 | 0.503685  |
| C | 0.014653  | -1.077814 | -0.560956 |
| C | 0.288699  | 0.229302  | -1.255236 |
| C | 2.527610  | 0.123134  | -0.185081 |
| H | 1.593977  | -0.972097 | 1.486086  |
| H | 3.003090  | -0.136261 | -1.134129 |
| H | -0.637979 | 0.804536  | -1.341319 |
| H | 0.667210  | 0.045977  | -2.266531 |
| H | -0.422576 | -0.999306 | 0.429145  |
| C | -0.148135 | -2.257352 | -1.241119 |
| C | -0.714891 | -3.449079 | -0.604507 |

|   |           |           |           |
|---|-----------|-----------|-----------|
| H | 0.130263  | -2.325979 | -2.291056 |
| H | -0.387230 | -4.394369 | -1.040864 |
| H | -0.607383 | -3.466343 | 0.480170  |
| S | -2.652742 | -3.591533 | -0.895399 |
| C | -3.085811 | -1.996584 | -0.355961 |
| N | -3.294626 | -1.607970 | 0.918284  |
| N | -3.169649 | -0.905131 | -1.138567 |
| C | -3.497015 | -0.234825 | 0.967624  |
| H | -3.270500 | -2.237564 | 1.715592  |
| C | -3.420692 | 0.219085  | -0.365261 |
| H | -2.993284 | -0.919297 | -2.138339 |
| C | -3.717338 | 0.643961  | 2.030820  |
| C | -3.555158 | 1.569389  | -0.693515 |
| C | -3.848640 | 1.989767  | 1.702990  |
| H | -3.771243 | 0.290893  | 3.054573  |
| C | -3.768860 | 2.444397  | 0.366572  |
| H | -3.487431 | 1.910623  | -1.720349 |
| H | -4.013165 | 2.712670  | 2.495388  |
| H | -3.871815 | 3.505467  | 0.163897  |
| H | 3.272795  | 0.658845  | 0.417634  |
| C | 1.340852  | 1.065759  | -0.490288 |
| C | 0.748950  | 1.626957  | 0.806810  |
| O | -0.399386 | 1.466196  | 1.183542  |
| O | 1.661749  | 2.320656  | 1.492644  |
| C | 1.228836  | 2.908857  | 2.743921  |
| H | 0.419208  | 3.618669  | 2.560895  |
| H | 0.899488  | 2.125025  | 3.429124  |
| H | 2.106193  | 3.419813  | 3.137963  |
| C | 1.775254  | 2.239924  | -1.362511 |
| O | 2.841213  | 2.323416  | -1.947287 |

|   |          |           |           |
|---|----------|-----------|-----------|
| O | 0.814029 | 3.165501  | -1.433501 |
| C | 1.079387 | 4.328960  | -2.257274 |
| H | 0.182081 | 4.941455  | -2.182368 |
| H | 1.946629 | 4.867524  | -1.869675 |
| H | 1.251918 | 4.021614  | -3.290603 |
| C | 2.705834 | -2.436308 | 0.282588  |
| H | 1.953115 | -3.232539 | 0.360544  |
| H | 3.104063 | -2.484296 | -0.737343 |
| C | 3.822129 | -2.754785 | 1.304745  |
| H | 3.374450 | -2.786898 | 2.306923  |
| H | 4.192225 | -3.768028 | 1.093847  |
| C | 5.007590 | -1.779865 | 1.312998  |
| H | 4.661493 | -0.778722 | 1.602211  |
| H | 5.708831 | -2.097779 | 2.095667  |
| C | 5.755110 | -1.696695 | -0.020344 |
| H | 5.117959 | -1.306816 | -0.820383 |
| H | 6.627645 | -1.037884 | 0.057243  |
| H | 6.111554 | -2.686597 | -0.332956 |

**TS4-trans**

Eopt = -1665.048554

59 atoms

|   |          |           |           |
|---|----------|-----------|-----------|
| C | 1.587266 | 1.207174  | -0.024475 |
| C | 1.269169 | 0.361195  | 2.111298  |
| C | 2.007091 | -0.934961 | 1.843520  |
| C | 2.683799 | 0.222110  | -0.277529 |
| H | 0.607933 | 0.964962  | -0.434287 |
| H | 3.611593 | 0.559191  | 0.195318  |
| H | 1.436596 | -1.786846 | 2.219018  |
| H | 2.966394 | -0.918250 | 2.370357  |
| H | 1.872223 | 1.230158  | 2.362468  |

|   |           |           |           |
|---|-----------|-----------|-----------|
| C | -0.056514 | 0.369412  | 2.454002  |
| C | -0.807610 | 1.586376  | 2.799843  |
| H | -0.625109 | -0.553560 | 2.383465  |
| H | -1.617100 | 1.412157  | 3.509002  |
| H | -0.170915 | 2.402532  | 3.150714  |
| C | 2.307900  | -1.145986 | 0.330119  |
| H | 2.889745  | 0.104188  | -1.350297 |
| C | 1.908402  | 2.661555  | 0.101176  |
| H | 1.089353  | 3.182270  | 0.611495  |
| H | 2.809163  | 2.789549  | 0.716634  |
| C | 2.137322  | 3.341423  | -1.266838 |
| H | 2.963495  | 2.840380  | -1.788709 |
| H | 1.242349  | 3.203951  | -1.889262 |
| C | 2.445401  | 4.836409  | -1.138872 |
| H | 1.619724  | 5.329359  | -0.607280 |
| H | 3.339188  | 4.967430  | -0.513568 |
| C | 2.662357  | 5.517240  | -2.492137 |
| H | 2.882238  | 6.584502  | -2.372093 |
| H | 3.501231  | 5.062292  | -3.033234 |
| H | 1.770992  | 5.429321  | -3.125645 |
| C | 1.084289  | -1.694541 | -0.406929 |
| O | -0.031387 | -1.828723 | 0.075382  |
| O | 1.370219  | -1.983609 | -1.675125 |
| C | 0.282215  | -2.477052 | -2.499146 |
| H | 0.725924  | -2.650729 | -3.478249 |
| H | -0.106527 | -3.407232 | -2.080656 |
| H | -0.505534 | -1.723897 | -2.560688 |
| C | 3.447872  | -2.151267 | 0.185447  |
| O | 4.594757  | -1.868927 | -0.118610 |
| O | 3.039167  | -3.388548 | 0.483263  |

|   |           |           |           |
|---|-----------|-----------|-----------|
| C | 4.031570  | -4.444450 | 0.417883  |
| H | 3.496676  | -5.354011 | 0.687115  |
| H | 4.429171  | -4.516459 | -0.596572 |
| H | 4.835198  | -4.244117 | 1.129330  |
| S | -1.667660 | 2.457740  | 1.304893  |
| C | -2.656917 | 1.180218  | 0.658064  |
| N | -3.989357 | 1.271755  | 0.470470  |
| N | -2.256049 | -0.019034 | 0.198047  |
| C | -4.467116 | 0.109190  | -0.122979 |
| H | -4.549747 | 2.071304  | 0.748967  |
| C | -3.349071 | -0.729375 | -0.285082 |
| H | -1.296395 | -0.368033 | 0.193199  |
| C | -5.746986 | -0.285444 | -0.515701 |
| C | -3.459192 | -2.003778 | -0.844312 |
| C | -5.857875 | -1.556091 | -1.074714 |
| H | -6.604874 | 0.365025  | -0.386787 |
| C | -4.735810 | -2.398509 | -1.236205 |
| H | -2.594019 | -2.645001 | -0.963860 |
| H | -6.833080 | -1.909632 | -1.393750 |
| H | -4.872894 | -3.380320 | -1.677918 |

### Structure 5

Eopt = -1894.979620

67 atoms

|   |           |           |           |
|---|-----------|-----------|-----------|
| C | -2.028738 | -0.411227 | -1.339418 |
| C | -3.255950 | -0.280385 | -0.388621 |
| C | -3.929115 | 1.118838  | -0.601872 |
| C | -3.066222 | 2.257561  | -0.141556 |
| C | -0.974808 | -1.388548 | -0.928080 |
| H | -2.430817 | -0.650603 | -2.336834 |
| H | -1.586285 | 0.581917  | -1.433777 |

|   |           |           |           |
|---|-----------|-----------|-----------|
| H | -4.142075 | 1.205603  | -1.671574 |
| H | -4.885334 | 1.125323  | -0.071640 |
| H | -3.040116 | 2.459490  | 0.927858  |
| C | -4.621274 | -3.699028 | -0.904007 |
| O | -3.737415 | -2.591681 | -0.633528 |
| O | -5.446744 | -1.168347 | -0.999335 |
| C | -3.403258 | -1.074843 | 3.250040  |
| O | -1.830006 | 0.189626  | 1.516960  |
| O | -3.695741 | -1.018359 | 1.832940  |
| C | -2.309085 | 2.998713  | -0.956479 |
| H | -2.322067 | 2.823528  | -2.031034 |
| C | -1.420758 | 4.094873  | -0.472315 |
| H | -1.435118 | 4.207798  | 0.614166  |
| H | -1.286146 | -2.298787 | -0.425199 |
| H | -1.673332 | 5.059739  | -0.926149 |
| S | 0.348467  | 3.903462  | -1.021420 |
| C | 0.993297  | 2.698120  | 0.057600  |
| C | 2.575217  | 1.525260  | 1.129675  |
| C | 1.323642  | 0.965174  | 1.432901  |
| N | 2.318717  | 2.596326  | 0.280280  |
| N | 0.375761  | 1.723413  | 0.743420  |
| H | 3.017903  | 3.229806  | -0.094507 |
| H | -0.618245 | 1.482452  | 0.715725  |
| C | 1.203031  | -0.147199 | 2.264688  |
| C | 3.761418  | 1.009361  | 1.646656  |
| C | 3.641200  | -0.097574 | 2.482363  |
| H | 4.536833  | -0.536189 | 2.910080  |
| C | 2.386967  | -0.665219 | 2.782614  |
| H | 2.342428  | -1.533089 | 3.432798  |
| H | 4.722252  | 1.449572  | 1.405316  |

|   |           |           |           |
|---|-----------|-----------|-----------|
| H | 0.235854  | -0.579884 | 2.485156  |
| H | -2.468609 | -1.614782 | 3.417919  |
| H | -3.331793 | -0.065413 | 3.660013  |
| H | -4.240187 | -1.612686 | 3.693650  |
| H | -5.438641 | -3.717397 | -0.178848 |
| H | -5.026940 | -3.625222 | -1.915852 |
| H | -4.005109 | -4.592639 | -0.805590 |
| C | -4.288935 | -1.370677 | -0.700235 |
| C | -2.827562 | -0.358350 | 1.072083  |
| C | 0.408704  | -1.193316 | -1.138034 |
| C | 0.947320  | -0.075908 | -1.842414 |
| C | 1.345521  | -2.123659 | -0.608428 |
| C | 2.315022  | 0.087063  | -1.959908 |
| H | 0.284764  | 0.657077  | -2.290304 |
| C | 2.721899  | -1.955945 | -0.722167 |
| H | 0.962599  | -2.989354 | -0.070939 |
| C | 3.228589  | -0.828249 | -1.403565 |
| H | 2.703108  | 0.952618  | -2.493102 |
| C | 3.654853  | -2.963303 | -0.077405 |
| C | 4.714900  | -0.597946 | -1.576109 |
| C | 5.079149  | -2.902861 | -0.636774 |
| C | 5.578922  | -1.456315 | -0.646585 |
| H | 4.986178  | -0.820025 | -2.619797 |
| H | 5.534104  | -1.056168 | 0.374616  |
| H | 5.739973  | -3.538923 | -0.036179 |
| H | 3.689997  | -2.763671 | 1.003498  |
| H | 3.236948  | -3.971383 | -0.186889 |
| H | 5.093992  | -3.300524 | -1.661398 |
| H | 6.626303  | -1.405673 | -0.966344 |
| H | 4.936327  | 0.467544  | -1.432188 |

**TS5-cis**

Eopt = -1894.951463

67 atoms

|   |           |           |           |
|---|-----------|-----------|-----------|
| C | -1.367573 | 0.160072  | -1.785909 |
| C | 0.191739  | -0.342060 | -0.428448 |
| C | -0.158103 | 0.805244  | 0.485561  |
| C | -1.188380 | 1.655315  | -1.667645 |
| H | -0.881725 | -0.307043 | -2.636729 |
| H | -2.152596 | 2.168427  | -1.678443 |
| H | 0.644159  | 0.999241  | 1.203303  |
| H | -1.055734 | 0.550783  | 1.058791  |
| H | 0.901070  | -0.122271 | -1.225297 |
| C | 0.121339  | -1.655175 | 0.001175  |
| C | 0.710263  | -2.770887 | -0.770395 |
| H | -0.461583 | -1.909183 | 0.883755  |
| H | 0.000191  | -3.584140 | -0.952743 |
| H | 1.141429  | -2.453842 | -1.722343 |
| S | 2.058338  | -3.736521 | 0.146343  |
| C | 3.355721  | -2.584663 | 0.242207  |
| N | 3.296858  | -1.243162 | 0.176674  |
| N | 4.640654  | -2.938341 | 0.443523  |
| C | 4.572272  | -0.704793 | 0.340046  |
| H | 2.435487  | -0.711796 | 0.089019  |
| C | 5.437847  | -1.796483 | 0.519164  |
| H | 4.973661  | -3.895955 | 0.495534  |
| C | 5.031199  | 0.611201  | 0.348966  |
| C | 6.806861  | -1.624012 | 0.715988  |
| C | 6.399969  | 0.786676  | 0.549033  |
| H | 4.353944  | 1.445737  | 0.208314  |
| C | 7.270157  | -0.308665 | 0.727923  |

|   |           |           |           |
|---|-----------|-----------|-----------|
| H | 7.471272  | -2.470097 | 0.851789  |
| H | 6.805948  | 1.792967  | 0.567391  |
| H | 8.328867  | -0.123549 | 0.878610  |
| C | -0.429580 | 2.072166  | -0.352893 |
| H | -0.628655 | 2.014892  | -2.533757 |
| C | 0.887974  | 2.747203  | -0.740810 |
| O | 1.994702  | 2.243424  | -0.637201 |
| O | 0.671975  | 3.963602  | -1.250071 |
| C | 1.833982  | 4.705041  | -1.700095 |
| H | 1.442498  | 5.654192  | -2.062881 |
| H | 2.519553  | 4.864124  | -0.865194 |
| H | 2.332907  | 4.160686  | -2.504592 |
| C | -1.229539 | 3.070862  | 0.486935  |
| O | -2.362431 | 3.455589  | 0.254454  |
| O | -0.521849 | 3.457209  | 1.554273  |
| C | -1.156475 | 4.398761  | 2.456315  |
| H | -2.063526 | 3.958716  | 2.875685  |
| H | -0.421290 | 4.582439  | 3.238427  |
| H | -1.392121 | 5.322154  | 1.923091  |
| C | -2.560992 | -0.517012 | -1.314470 |
| C | -2.797040 | -1.856847 | -1.701531 |
| C | -3.468722 | 0.068251  | -0.411015 |
| C | -3.891343 | -2.552194 | -1.206907 |
| H | -2.110496 | -2.339259 | -2.392472 |
| C | -4.573684 | -0.627921 | 0.094048  |
| H | -3.321463 | 1.095209  | -0.091683 |
| C | -4.796523 | -1.959817 | -0.306762 |
| H | -4.059198 | -3.580551 | -1.520145 |
| C | -5.492192 | 0.061335  | 1.086579  |
| C | -5.998805 | -2.745731 | 0.176274  |

|   |           |           |           |
|---|-----------|-----------|-----------|
| C | -6.850847 | -0.630337 | 1.231809  |
| H | -4.994834 | 0.077028  | 2.067523  |
| H | -5.619966 | 1.110198  | 0.794813  |
| C | -6.659816 | -2.137967 | 1.417322  |
| H | -6.738464 | -2.784936 | -0.637450 |
| H | -5.703018 | -3.784870 | 0.364279  |
| H | -7.397009 | -0.198332 | 2.078042  |
| H | -7.456352 | -0.450893 | 0.332326  |
| H | -6.027485 | -2.315367 | 2.298563  |
| H | -7.618891 | -2.633846 | 1.605171  |

**TS5-trans**

Eopt = -1894.950019

67 atoms

|   |           |           |           |
|---|-----------|-----------|-----------|
| C | 1.809120  | 0.856811  | 0.817290  |
| C | 0.040878  | 0.417163  | -0.297259 |
| C | -0.193014 | 1.809837  | -0.859572 |
| C | 2.113674  | 2.085205  | 0.008382  |
| H | 1.312516  | 1.035780  | 1.764021  |
| H | 2.534898  | 1.821486  | -0.962688 |
| H | -1.221239 | 2.136149  | -0.694187 |
| H | -0.016762 | 1.787755  | -1.939193 |
| H | 0.660055  | -0.235748 | -0.902405 |
| C | -0.887024 | -0.198718 | 0.529904  |
| C | -0.810554 | -1.634033 | 0.854084  |
| H | -1.672061 | 0.391068  | 0.995126  |
| H | 0.201627  | -2.036466 | 0.771358  |
| H | -1.216853 | -1.896170 | 1.832472  |
| C | 0.788825  | 2.839936  | -0.229862 |
| H | 2.840171  | 2.728729  | 0.519099  |
| C | 0.234569  | 3.364074  | 1.102954  |

|   |           |           |           |
|---|-----------|-----------|-----------|
| O | -0.851859 | 3.075993  | 1.576281  |
| O | 1.108263  | 4.177484  | 1.701121  |
| C | 0.709500  | 4.747350  | 2.972708  |
| H | 1.546622  | 5.372991  | 3.279011  |
| H | -0.193942 | 5.347169  | 2.844259  |
| H | 0.537874  | 3.950531  | 3.699424  |
| C | 0.901776  | 4.042314  | -1.159362 |
| O | 0.117398  | 4.981556  | -1.132325 |
| O | 1.896296  | 3.933758  | -2.037047 |
| C | 2.021874  | 4.994782  | -3.018786 |
| H | 1.118875  | 5.042559  | -3.630815 |
| H | 2.192493  | 5.948404  | -2.515337 |
| H | 2.884092  | 4.719052  | -3.624135 |
| S | -1.706402 | -2.765762 | -0.413557 |
| C | -3.331323 | -2.179178 | -0.298510 |
| N | -4.258927 | -2.345515 | -1.262115 |
| N | -3.906456 | -1.517046 | 0.722565  |
| C | -5.469996 | -1.788235 | -0.855652 |
| H | -4.086286 | -2.795714 | -2.155245 |
| C | -5.240735 | -1.246138 | 0.419846  |
| H | -3.445906 | -1.281283 | 1.594608  |
| C | -6.713641 | -1.702089 | -1.478606 |
| C | -6.242869 | -0.590485 | 1.132283  |
| C | -7.719410 | -1.047679 | -0.767941 |
| H | -6.883460 | -2.121686 | -2.463939 |
| C | -7.488983 | -0.503232 | 0.512147  |
| H | -6.058338 | -0.174153 | 2.116371  |
| H | -8.705041 | -0.954449 | -1.212459 |
| H | -8.302012 | -0.003243 | 1.028538  |
| C | 2.644436  | -0.329634 | 0.808166  |

|   |          |           |           |
|---|----------|-----------|-----------|
| C | 2.594027 | -1.222329 | 1.904488  |
| C | 3.463950 | -0.685963 | -0.282000 |
| C | 3.335113 | -2.396457 | 1.895245  |
| H | 1.966292 | -0.979816 | 2.758033  |
| C | 4.210051 | -1.869322 | -0.300010 |
| H | 3.519030 | -0.032075 | -1.148284 |
| C | 4.152035 | -2.743878 | 0.805020  |
| H | 3.285276 | -3.067573 | 2.750060  |
| C | 5.041111 | -2.204290 | -1.525430 |
| C | 4.970195 | -4.018401 | 0.854943  |
| C | 6.101938 | -3.277074 | -1.261735 |
| H | 4.364579 | -2.561228 | -2.315774 |
| C | 5.481923 | -4.463134 | -0.518556 |
| H | 5.832134 | -3.852201 | 1.518394  |
| H | 4.377637 | -4.812767 | 1.324286  |
| H | 6.545182 | -3.598926 | -2.210896 |
| H | 6.914127 | -2.854550 | -0.653781 |
| H | 4.649226 | -4.865434 | -1.112418 |
| H | 6.210288 | -5.272817 | -0.396877 |
| H | 5.503563 | -1.288815 | -1.912183 |

### Structure 7

Eopt = -2432.142497

80 atoms

|   |           |          |           |
|---|-----------|----------|-----------|
| C | 0.976303  | 1.200643 | -0.857697 |
| C | 1.297928  | 0.181002 | 0.283889  |
| C | 0.976668  | 0.750893 | 1.700936  |
| C | -0.405992 | 1.324902 | 1.815263  |
| C | 1.669177  | 2.508147 | -0.693619 |
| H | 1.290256  | 0.745257 | -1.806580 |
| H | -0.099673 | 1.362027 | -0.928060 |

|   |           |           |           |
|---|-----------|-----------|-----------|
| H | 1.116034  | -0.040428 | 2.442950  |
| H | 1.700786  | 1.541741  | 1.936613  |
| H | -0.585233 | 2.253199  | 1.274950  |
| C | -0.473070 | -2.894168 | -1.093589 |
| C | -0.531510 | -3.157572 | 0.454668  |
| B | 0.495940  | -1.154145 | 0.033412  |
| O | 0.399433  | -2.153183 | 0.973569  |
| O | -0.117409 | -1.474662 | -1.151820 |
| C | -1.897828 | -2.849024 | 1.066801  |
| H | -2.254485 | -1.860667 | 0.770970  |
| H | -2.641856 | -3.592634 | 0.767567  |
| H | -1.812999 | -2.868768 | 2.157061  |
| C | -0.050443 | -4.534972 | 0.887238  |
| H | -0.118503 | -4.622368 | 1.976088  |
| H | -0.679172 | -5.314040 | 0.443982  |
| H | 0.985985  | -4.712221 | 0.592775  |
| C | -1.791797 | -3.098547 | -1.823328 |
| H | -2.574781 | -2.452215 | -1.427634 |
| H | -1.663926 | -2.868913 | -2.885746 |
| H | -2.116150 | -4.140737 | -1.736098 |
| C | 0.652211  | -3.654031 | -1.798002 |
| H | 1.609785  | -3.515379 | -1.289530 |
| H | 0.434968  | -4.724912 | -1.849373 |
| H | 0.750803  | -3.273636 | -2.819125 |
| C | 4.975590  | -0.685104 | 0.817075  |
| C | 4.725972  | -1.168079 | -0.657014 |
| B | 2.808784  | -0.261987 | 0.207186  |
| O | 3.612369  | -0.461377 | 1.303076  |
| O | 3.452972  | -0.521152 | -0.981019 |
| C | 5.696212  | 0.661943  | 0.900866  |

|   |           |           |           |
|---|-----------|-----------|-----------|
| H | 5.222183  | 1.411271  | 0.260105  |
| H | 5.657329  | 1.020516  | 1.933721  |
| H | 6.746129  | 0.567779  | 0.608847  |
| C | 5.654182  | -1.706415 | 1.718721  |
| H | 5.777924  | -1.286382 | 2.721683  |
| H | 5.068484  | -2.623968 | 1.801481  |
| H | 6.646520  | -1.957189 | 1.330203  |
| C | 5.773687  | -0.717860 | -1.664665 |
| H | 6.756137  | -1.120495 | -1.397781 |
| H | 5.511367  | -1.092349 | -2.658991 |
| H | 5.843724  | 0.370509  | -1.715858 |
| C | 4.492275  | -2.676162 | -0.767724 |
| H | 4.135524  | -2.906015 | -1.775680 |
| H | 5.418140  | -3.232558 | -0.595484 |
| H | 3.741063  | -3.019415 | -0.050653 |
| C | -1.416893 | 0.784871  | 2.506849  |
| H | -1.276232 | -0.154732 | 3.039648  |
| C | -2.774085 | 1.407203  | 2.605809  |
| H | -2.811928 | 2.395886  | 2.141225  |
| C | 1.028663  | 3.767193  | -0.620307 |
| C | 1.792925  | 4.958658  | -0.444028 |
| C | 1.150383  | 6.183117  | -0.364992 |
| C | -0.931583 | 5.012164  | -0.635487 |
| C | -0.247962 | 6.224070  | -0.461805 |
| H | 1.721955  | 7.096611  | -0.229227 |
| H | -2.017773 | 5.010784  | -0.713620 |
| H | -0.795493 | 7.158766  | -0.405053 |
| H | 2.754138  | 2.504860  | -0.606720 |
| H | -3.078086 | 1.526477  | 3.651836  |
| S | -4.141416 | 0.350104  | 1.949116  |

|    |           |           |           |
|----|-----------|-----------|-----------|
| C  | -3.893996 | 0.359660  | 0.186277  |
| C  | -4.615480 | -0.548758 | -0.609576 |
| C  | -3.036886 | 1.253411  | -0.476305 |
| C  | -4.500970 | -0.569688 | -1.997780 |
| C  | -2.904968 | 1.231173  | -1.864088 |
| H  | -2.461224 | 1.974120  | 0.085820  |
| C  | -3.636522 | 0.323624  | -2.631423 |
| H  | -5.076370 | -1.288448 | -2.571037 |
| H  | -2.222238 | 1.929707  | -2.336963 |
| H  | -3.535004 | 0.301077  | -3.711562 |
| Cl | -5.712465 | -1.706876 | 0.147181  |
| H  | 2.874066  | 4.887593  | -0.372802 |
| N  | -0.340473 | 3.822201  | -0.713300 |

**TS7-cis**

Eopt = -2432.123382

80 atoms

|   |           |           |           |
|---|-----------|-----------|-----------|
| C | 0.300638  | 1.916693  | -0.939430 |
| C | 0.708655  | 1.079468  | 0.960772  |
| C | -0.736359 | 0.802938  | 1.317884  |
| C | -1.191006 | 1.698500  | -0.915382 |
| H | 0.860427  | 1.188884  | -1.521199 |
| H | -1.555128 | 1.508632  | -1.932999 |
| H | -1.160775 | 1.674100  | 1.831735  |
| H | -0.789728 | -0.043626 | 2.011666  |
| H | 1.228798  | 0.246953  | 0.491011  |
| C | 1.491891  | 1.920733  | 1.738643  |
| C | 2.979255  | 2.075547  | 1.641809  |
| H | 1.007381  | 2.639813  | 2.398375  |
| H | 3.233487  | 3.077789  | 1.270592  |
| H | 3.454888  | 1.995245  | 2.627468  |

|   |           |           |           |
|---|-----------|-----------|-----------|
| C | -1.527710 | 0.506549  | 0.022095  |
| H | -1.683143 | 2.606173  | -0.552397 |
| S | 3.864092  | 0.989412  | 0.461403  |
| C | -0.608498 | -3.114224 | -0.709627 |
| C | -0.016981 | -2.372623 | -1.961013 |
| B | -1.037918 | -0.867163 | -0.577299 |
| O | -0.683039 | -1.069371 | -1.888886 |
| O | -0.905959 | -2.000193 | 0.191635  |
| C | 1.483397  | -2.098156 | -1.841467 |
| H | 1.729769  | -1.634720 | -0.882917 |
| H | 2.064243  | -3.019213 | -1.939627 |
| H | 1.786387  | -1.415492 | -2.640311 |
| C | -0.339970 | -3.015737 | -3.301047 |
| H | -1.416753 | -3.072273 | -3.473000 |
| H | 0.106914  | -2.427147 | -4.108289 |
| H | 0.076448  | -4.027275 | -3.347467 |
| C | 0.360368  | -4.057217 | -0.011161 |
| H | 1.247039  | -3.531457 | 0.346631  |
| H | -0.133112 | -4.521198 | 0.848592  |
| H | 0.675558  | -4.853720 | -0.693158 |
| C | -1.936459 | -3.817932 | -0.993969 |
| H | -2.380723 | -4.133595 | -0.045307 |
| H | -2.642327 | -3.152563 | -1.498996 |
| H | -1.787763 | -4.705918 | -1.615289 |
| C | -5.101110 | 0.266292  | 1.316387  |
| C | -5.276240 | -0.044412 | -0.213900 |
| B | -3.071613 | 0.359396  | 0.258664  |
| O | -3.991644 | 0.390596  | -0.765136 |
| O | -3.650550 | 0.159413  | 1.489004  |
| C | -5.398096 | -1.539379 | -0.517277 |

|    |           |           |           |
|----|-----------|-----------|-----------|
| H  | -4.604782 | -2.113185 | -0.030074 |
| H  | -6.364873 | -1.932036 | -0.188970 |
| H  | -5.315416 | -1.689124 | -1.597866 |
| C  | -6.391460 | 0.730189  | -0.901099 |
| H  | -6.431949 | 0.454453  | -1.959439 |
| H  | -7.358583 | 0.487253  | -0.449104 |
| H  | -6.234553 | 1.808603  | -0.833905 |
| C  | -5.778408 | -0.724633 | 2.252258  |
| H  | -5.398173 | -1.738297 | 2.110996  |
| H  | -5.597242 | -0.431639 | 3.291037  |
| H  | -6.860205 | -0.728764 | 2.083788  |
| C  | -5.480891 | 1.699933  | 1.691826  |
| H  | -5.000297 | 2.427840  | 1.031510  |
| H  | -6.563665 | 1.848438  | 1.646141  |
| H  | -5.150582 | 1.896528  | 2.716155  |
| C  | 3.747773  | -0.627585 | 1.194145  |
| C  | 3.129698  | -0.885916 | 2.429311  |
| C  | 4.292843  | -1.725053 | 0.503508  |
| C  | 3.059540  | -2.181557 | 2.940822  |
| H  | 2.684306  | -0.073882 | 2.989558  |
| C  | 4.229526  | -3.021998 | 1.007126  |
| C  | 3.606550  | -3.254372 | 2.234102  |
| H  | 2.567530  | -2.347653 | 3.894183  |
| H  | 4.660182  | -3.838889 | 0.438245  |
| H  | 3.548132  | -4.264618 | 2.625792  |
| Cl | 5.085623  | -1.475745 | -1.053229 |
| C  | 0.879194  | 3.252316  | -0.975633 |
| C  | 2.139607  | 3.464428  | -1.578485 |
| C  | 2.719600  | 4.726123  | -1.538798 |
| H  | 2.641157  | 2.635251  | -2.066262 |

|   |          |          |           |
|---|----------|----------|-----------|
| C | 0.793978 | 5.473998 | -0.327972 |
| C | 2.036740 | 5.764050 | -0.894991 |
| H | 3.687429 | 4.900756 | -2.000216 |
| H | 0.230899 | 6.255791 | 0.178711  |
| H | 2.448276 | 6.766171 | -0.834585 |
| N | 0.221463 | 4.264027 | -0.356390 |

**TS7-trans**

Eopt = -2432.124340

80 atoms

|   |           |           |           |
|---|-----------|-----------|-----------|
| C | -0.013814 | 2.135327  | -0.446768 |
| C | -0.090783 | 1.661771  | 1.627868  |
| C | 1.268323  | 0.973458  | 1.707039  |
| C | 1.435459  | 1.765208  | -0.616487 |
| H | -0.716782 | 1.409773  | -0.855619 |
| H | 2.067643  | 2.616508  | -0.346202 |
| H | 1.217056  | 0.106551  | 2.371554  |
| H | 1.990697  | 1.672957  | 2.142030  |
| H | -0.109306 | 2.714614  | 1.912836  |
| C | -1.254306 | 0.932805  | 1.862540  |
| C | -2.598851 | 1.557649  | 1.950611  |
| H | -1.204053 | -0.152699 | 1.838110  |
| H | -3.134546 | 1.324181  | 2.875825  |
| H | -2.540435 | 2.646966  | 1.873230  |
| S | -3.706682 | 1.093320  | 0.528694  |
| C | 1.748288  | 0.551895  | 0.291200  |
| H | 1.636316  | 1.525260  | -1.668306 |
| C | -0.092455 | -2.164413 | -1.641702 |
| C | 0.095936  | -2.843061 | -0.236947 |
| B | 0.991288  | -0.734517 | -0.220025 |
| O | 0.480621  | -1.707384 | 0.604846  |

|   |           |           |           |
|---|-----------|-----------|-----------|
| O | 0.811370  | -1.016496 | -1.553170 |
| C | -1.165996 | -3.467829 | 0.338087  |
| H | -0.952041 | -3.892448 | 1.323806  |
| H | -1.963567 | -2.733796 | 0.448489  |
| H | -1.521098 | -4.275078 | -0.310518 |
| C | 1.259684  | -3.834226 | -0.190729 |
| H | 1.027569  | -4.743728 | -0.752420 |
| H | 2.175594  | -3.396518 | -0.598724 |
| H | 1.448047  | -4.111154 | 0.850818  |
| C | -1.496943 | -1.598181 | -1.855135 |
| H | -1.812115 | -0.977701 | -1.013150 |
| H | -1.496897 | -0.976726 | -2.755263 |
| H | -2.230440 | -2.397254 | -1.989549 |
| C | 0.322107  | -3.023424 | -2.827399 |
| H | 0.163458  | -2.467837 | -3.756865 |
| H | 1.375033  | -3.307301 | -2.773006 |
| H | -0.284953 | -3.933733 | -2.867570 |
| C | 5.311150  | -0.422468 | -0.590104 |
| C | 5.325053  | -0.557525 | 0.974841  |
| B | 3.265742  | 0.147267  | 0.261474  |
| O | 3.898568  | -0.493715 | 1.300911  |
| O | 4.088900  | 0.350305  | -0.820963 |
| C | 5.886852  | -1.871527 | 1.498377  |
| H | 5.318372  | -2.728582 | 1.131888  |
| H | 6.931916  | -1.986990 | 1.193158  |
| H | 5.849527  | -1.877137 | 2.592158  |
| C | 5.989895  | 0.626036  | 1.680048  |
| H | 7.073834  | 0.616125  | 1.533404  |
| H | 5.597407  | 1.580711  | 1.317577  |
| H | 5.787889  | 0.557810  | 2.753152  |

|    |           |           |           |
|----|-----------|-----------|-----------|
| C  | 5.123326  | -1.759341 | -1.310545 |
| H  | 4.278486  | -2.320502 | -0.900185 |
| H  | 4.922669  | -1.565986 | -2.368413 |
| H  | 6.022207  | -2.378365 | -1.237593 |
| C  | 6.490102  | 0.338209  | -1.179010 |
| H  | 6.388364  | 0.387556  | -2.267557 |
| H  | 6.545933  | 1.358105  | -0.793253 |
| H  | 7.428543  | -0.176241 | -0.948023 |
| C  | -4.102488 | -0.611322 | 0.855256  |
| C  | -3.860069 | -1.255250 | 2.081054  |
| C  | -4.717717 | -1.370428 | -0.157521 |
| C  | -4.212748 | -2.590036 | 2.277102  |
| H  | -3.387755 | -0.717845 | 2.893171  |
| C  | -5.072886 | -2.704474 | 0.028552  |
| C  | -4.817979 | -3.321610 | 1.253780  |
| H  | -4.004634 | -3.056647 | 3.234916  |
| H  | -5.542391 | -3.250625 | -0.782490 |
| H  | -5.088351 | -4.362287 | 1.399861  |
| Cl | -5.072930 | -0.629403 | -1.718523 |
| C  | -0.474707 | 3.510760  | -0.548326 |
| C  | -1.785709 | 3.795897  | -0.994920 |
| C  | -0.082509 | 5.767273  | -0.198129 |
| C  | -2.230012 | 5.111322  | -1.032509 |
| H  | -2.428385 | 2.980909  | -1.309889 |
| C  | -1.362530 | 6.130940  | -0.624102 |
| H  | 0.620902  | 6.532159  | 0.126010  |
| H  | -3.233951 | 5.341855  | -1.377453 |
| H  | -1.662924 | 7.173388  | -0.635023 |
| N  | 0.361573  | 4.506061  | -0.152215 |

**Structure 9**

Eopt = -2470.483762

82 atoms

|   |           |           |           |
|---|-----------|-----------|-----------|
| C | -0.603501 | -0.923342 | 0.379055  |
| C | 0.252059  | 0.230953  | 1.045661  |
| C | -0.318968 | 0.595133  | 2.450974  |
| C | -1.727121 | 1.104764  | 2.367915  |
| C | 0.147830  | -2.161242 | 0.023944  |
| H | -1.379214 | -1.208670 | 1.096796  |
| H | -1.131384 | -0.533397 | -0.493417 |
| H | -0.280651 | -0.285060 | 3.104068  |
| H | 0.325409  | 1.359151  | 2.903245  |
| H | -1.873565 | 2.041450  | 1.826578  |
| C | 3.980960  | -0.380330 | 0.617098  |
| C | 3.747441  | -0.911802 | 2.079751  |
| B | 1.771417  | -0.191017 | 1.183324  |
| O | 2.396237  | -0.438209 | 2.376822  |
| O | 2.620978  | -0.262655 | 0.103775  |
| C | 3.707092  | -2.437284 | 2.174976  |
| H | 3.348001  | -2.718951 | 3.170604  |
| H | 3.036979  | -2.874736 | 1.428997  |
| H | 4.705120  | -2.867095 | 2.039703  |
| C | 4.696550  | -0.341925 | 3.124953  |
| H | 4.450777  | -0.754402 | 4.109320  |
| H | 5.731455  | -0.614936 | 2.892206  |
| H | 4.627779  | 0.746943  | 3.184701  |
| C | 4.762244  | -1.324688 | -0.286377 |
| H | 4.841412  | -0.892197 | -1.289482 |
| H | 5.777299  | -1.469652 | 0.099590  |
| H | 4.276785  | -2.298786 | -0.368264 |
| C | 4.583851  | 1.024986  | 0.569575  |

|   |           |           |           |
|---|-----------|-----------|-----------|
| H | 4.572947  | 1.383080  | -0.464699 |
| H | 4.005124  | 1.726451  | 1.178567  |
| H | 5.620464  | 1.027924  | 0.920396  |
| C | 0.784527  | 3.693391  | -0.408864 |
| C | 0.606819  | 2.824887  | -1.705042 |
| B | 0.361108  | 1.517085  | 0.149871  |
| O | 0.920768  | 2.677891  | 0.630428  |
| O | 0.003598  | 1.604687  | -1.173301 |
| C | -0.457681 | 4.513520  | -0.057271 |
| H | -0.340647 | 4.920816  | 0.952097  |
| H | -0.595419 | 5.348753  | -0.751081 |
| H | -1.361144 | 3.895049  | -0.073034 |
| C | 2.027197  | 4.571514  | -0.394729 |
| H | 2.939784  | 3.977679  | -0.487493 |
| H | 1.994987  | 5.295615  | -1.215971 |
| H | 2.075642  | 5.128519  | 0.547036  |
| C | -0.322002 | 3.419446  | -2.753054 |
| H | 0.099750  | 4.349749  | -3.148946 |
| H | -0.434961 | 2.717066  | -3.585645 |
| H | -1.313167 | 3.633930  | -2.348781 |
| C | 1.931964  | 2.408527  | -2.346606 |
| H | 2.593499  | 1.935267  | -1.616146 |
| H | 1.730533  | 1.683457  | -3.141999 |
| H | 2.446670  | 3.266260  | -2.790383 |
| C | -2.795409 | 0.466268  | 2.857197  |
| H | -2.663864 | -0.478329 | 3.385120  |
| C | -4.202420 | 0.922569  | 2.674598  |
| H | -4.263203 | 1.928259  | 2.252151  |
| H | 0.429972  | -2.884120 | 0.780330  |
| H | -4.767095 | 0.915699  | 3.613769  |

|    |           |           |           |
|----|-----------|-----------|-----------|
| S  | -5.175648 | -0.268072 | 1.626722  |
| C  | -4.301493 | -0.214244 | 0.071841  |
| C  | -4.087917 | -1.380277 | -0.680380 |
| C  | -3.844627 | 0.998007  | -0.470545 |
| C  | -3.453959 | -1.347730 | -1.922655 |
| C  | -3.196260 | 1.039776  | -1.700946 |
| H  | -4.008006 | 1.919896  | 0.076472  |
| C  | -3.003195 | -0.132726 | -2.432901 |
| H  | -3.308132 | -2.270140 | -2.474405 |
| H  | -2.847552 | 1.989342  | -2.089515 |
| H  | -2.500223 | -0.106929 | -3.394352 |
| Cl | -4.624063 | -2.951043 | -0.081286 |
| C  | 1.810340  | -3.251298 | -1.360030 |
| C  | 0.632987  | -1.443971 | -2.338097 |
| C  | 2.339796  | -3.093366 | -2.775383 |
| C  | 1.903581  | -1.676316 | -3.167345 |
| H  | 0.499420  | -0.403396 | -2.046784 |
| H  | -0.270409 | -1.778570 | -2.864624 |
| H  | 3.420937  | -3.254162 | -2.799986 |
| H  | 1.875579  | -3.855757 | -3.416563 |
| H  | 2.667627  | -0.954772 | -2.861375 |
| H  | 1.720836  | -1.554657 | -4.237872 |
| N  | 0.843854  | -2.289342 | -1.153960 |
| O  | 2.154618  | -4.086577 | -0.520068 |

**TS9-cis**

Eopt = -2470.468842

82 atoms

|   |          |           |          |
|---|----------|-----------|----------|
| C | 3.150092 | -0.990563 | 0.528507 |
| C | 2.039065 | -0.006254 | 0.486078 |
| H | 2.226897 | 0.991210  | 0.876743 |

|   |           |           |           |
|---|-----------|-----------|-----------|
| C | 0.769359  | -0.337181 | 0.056212  |
| C | -0.290376 | -1.260810 | 1.740206  |
| C | -1.421414 | -0.274856 | 1.769092  |
| C | -1.672951 | 0.224762  | 0.323930  |
| C | -0.295398 | 0.704291  | -0.205785 |
| H | 3.750688  | -0.936122 | 1.440230  |
| H | 2.775521  | -2.014241 | 0.441208  |
| H | 0.667718  | -1.263955 | -0.508274 |
| H | -1.173299 | 0.574808  | 2.413033  |
| H | -2.326123 | -0.738069 | 2.184411  |
| H | -0.008096 | 1.640335  | 0.291064  |
| H | -0.353478 | 0.913930  | -1.279490 |
| N | 0.573606  | -1.386510 | 2.821042  |
| C | 0.907334  | -0.286696 | 3.736699  |
| C | 1.321940  | -2.517355 | 3.047772  |
| C | 2.231718  | -0.735252 | 4.381963  |
| H | 0.107165  | -0.163813 | 4.475907  |
| H | 1.006756  | 0.646007  | 3.177173  |
| C | 2.220062  | -2.264391 | 4.243570  |
| O | 1.238190  | -3.557950 | 2.386291  |
| H | 2.312791  | -0.395626 | 5.416575  |
| H | 3.072499  | -0.318259 | 3.819661  |
| H | 1.773927  | -2.755309 | 5.118284  |
| H | 3.206045  | -2.706432 | 4.081920  |
| H | -0.478098 | -2.220119 | 1.267892  |
| S | 4.333964  | -0.907499 | -0.921316 |
| C | 5.219049  | 0.611977  | -0.656887 |
| C | 5.137644  | 1.369703  | 0.524895  |
| C | 6.071517  | 1.094590  | -1.667569 |
| C | 5.866212  | 2.548697  | 0.679909  |

|    |           |           |           |
|----|-----------|-----------|-----------|
| H  | 4.503096  | 1.038907  | 1.336512  |
| C  | 6.805826  | 2.269495  | -1.521815 |
| C  | 6.701683  | 3.006210  | -0.341227 |
| H  | 5.776943  | 3.108075  | 1.606168  |
| H  | 7.450293  | 2.600941  | -2.328929 |
| H  | 7.269305  | 3.923840  | -0.226008 |
| Cl | 6.244098  | 0.194077  | -3.176369 |
| C  | -3.733665 | -2.531679 | -1.290076 |
| C  | -2.531032 | -2.411923 | -2.294094 |
| C  | -3.925824 | 3.182446  | -0.481712 |
| C  | -4.618358 | 2.585026  | 0.796458  |
| B  | -2.265739 | -0.929274 | -0.572149 |
| B  | -2.755889 | 1.362197  | 0.270249  |
| O  | -3.582243 | 1.689334  | 1.318123  |
| O  | -2.995348 | 2.115360  | -0.855174 |
| O  | -3.234666 | -1.797283 | -0.125071 |
| O  | -1.907771 | -1.153370 | -1.878215 |
| C  | -1.474693 | -3.502981 | -2.108934 |
| H  | -1.840758 | -4.471810 | -2.460758 |
| H  | -0.587271 | -3.238643 | -2.691496 |
| H  | -1.178701 | -3.602962 | -1.060642 |
| C  | -2.928333 | -2.299145 | -3.758676 |
| H  | -2.029605 | -2.213777 | -4.377191 |
| H  | -3.474845 | -3.193653 | -4.074572 |
| H  | -3.554350 | -1.423408 | -3.940834 |
| C  | -4.073087 | -3.952288 | -0.863782 |
| H  | -4.366115 | -4.550263 | -1.732794 |
| H  | -3.228218 | -4.439401 | -0.372918 |
| H  | -4.914205 | -3.934871 | -0.163783 |
| C  | -4.991409 | -1.799051 | -1.761719 |

|   |           |           |           |
|---|-----------|-----------|-----------|
| H | -4.766042 | -0.774377 | -2.071088 |
| H | -5.461833 | -2.320655 | -2.600206 |
| H | -5.708096 | -1.759217 | -0.936328 |
| C | -3.077719 | 4.421670  | -0.189707 |
| H | -3.706469 | 5.285690  | 0.043983  |
| H | -2.393712 | 4.251070  | 0.646970  |
| H | -2.481979 | 4.659932  | -1.075820 |
| C | -4.862066 | 3.443090  | -1.652930 |
| H | -4.292509 | 3.847400  | -2.495400 |
| H | -5.359473 | 2.528930  | -1.982895 |
| H | -5.625148 | 4.177060  | -1.374500 |
| C | -4.970065 | 3.604078  | 1.870400  |
| H | -5.682337 | 4.337723  | 1.479269  |
| H | -5.437378 | 3.096164  | 2.719740  |
| H | -4.085883 | 4.133329  | 2.231205  |
| C | -5.829852 | 1.707699  | 0.475479  |
| H | -5.595467 | 0.965864  | -0.292827 |
| H | -6.131872 | 1.175604  | 1.382397  |
| H | -6.675336 | 2.311200  | 0.132769  |

**TS9-trans**

Eopt = -2470.468936

82 atoms

|   |           |           |           |
|---|-----------|-----------|-----------|
| C | 0.025853  | 2.646074  | 0.218953  |
| C | -0.520159 | 1.197314  | -1.397121 |
| C | 0.938074  | 0.871321  | -1.618715 |
| C | 1.364933  | 2.038101  | 0.567836  |
| H | 0.033298  | 3.561802  | -0.368191 |
| H | 1.443112  | 1.832814  | 1.638981  |
| H | 1.401233  | 1.654781  | -2.232492 |
| H | 1.027606  | -0.067362 | -2.176560 |

|   |           |           |           |
|---|-----------|-----------|-----------|
| H | -1.037282 | 0.537557  | -0.695646 |
| C | -1.291551 | 1.849024  | -2.318896 |
| C | -2.775344 | 2.064442  | -2.249967 |
| H | -0.805131 | 2.397747  | -3.126691 |
| H | -2.994643 | 3.117902  | -2.028167 |
| H | -3.260142 | 1.845159  | -3.208941 |
| S | -3.697319 | 1.206425  | -0.919485 |
| C | 1.659369  | 0.738223  | -0.257487 |
| H | 2.129793  | 2.787433  | 0.336805  |
| C | 5.212875  | -0.021196 | -1.395219 |
| C | 5.426930  | 0.372715  | 0.110818  |
| B | 3.206095  | 0.515414  | -0.430574 |
| O | 4.145740  | 0.995818  | 0.450696  |
| O | 3.761317  | -0.202873 | -1.463396 |
| C | 5.584804  | -0.835495 | 1.035636  |
| H | 5.526540  | -0.497140 | 2.074334  |
| H | 4.792707  | -1.571392 | 0.872111  |
| H | 6.551936  | -1.324207 | 0.886353  |
| C | 6.540487  | 1.380153  | 0.357370  |
| H | 7.502584  | 0.971607  | 0.031790  |
| H | 6.361363  | 2.317872  | -0.172494 |
| H | 6.608405  | 1.597734  | 1.427796  |
| C | 5.887172  | -1.318035 | -1.819205 |
| H | 6.972511  | -1.239479 | -1.698939 |
| H | 5.531005  | -2.168265 | -1.234178 |
| H | 5.675390  | -1.514100 | -2.874832 |
| C | 5.559008  | 1.104649  | -2.371331 |
| H | 5.204580  | 0.829690  | -3.369189 |
| H | 5.079214  | 2.045015  | -2.084152 |
| H | 6.639600  | 1.266176  | -2.423109 |

|   |           |           |           |
|---|-----------|-----------|-----------|
| C | 0.174753  | -2.595667 | 0.823809  |
| C | 0.860101  | -2.108162 | 2.151311  |
| B | 1.170855  | -0.562865 | 0.486607  |
| O | 1.145440  | -0.703031 | 1.853447  |
| O | 0.758830  | -1.696564 | -0.172064 |
| C | -0.026654 | -2.171361 | 3.386737  |
| H | 0.524577  | -1.797087 | 4.254966  |
| H | -0.929425 | -1.569176 | 3.267635  |
| H | -0.321134 | -3.205850 | 3.590544  |
| C | 2.206618  | -2.780152 | 2.421202  |
| H | 2.853818  | -2.744256 | 1.540525  |
| H | 2.710106  | -2.252882 | 3.236824  |
| H | 2.075066  | -3.825427 | 2.715436  |
| C | -1.334854 | -2.354332 | 0.787744  |
| H | -1.865056 | -3.041189 | 1.453567  |
| H | -1.586494 | -1.330147 | 1.074494  |
| H | -1.691129 | -2.518290 | -0.230965 |
| C | 0.488826  | -4.031777 | 0.430230  |
| H | 0.133492  | -4.723818 | 1.200580  |
| H | -0.022734 | -4.274136 | -0.506390 |
| H | 1.560037  | -4.187175 | 0.287072  |
| C | -3.717896 | -0.494291 | -1.433079 |
| C | -3.073233 | -0.970329 | -2.587171 |
| C | -4.413398 | -1.433303 | -0.650246 |
| C | -3.134710 | -2.318272 | -2.940346 |
| H | -2.504813 | -0.285998 | -3.203967 |
| C | -4.487291 | -2.779414 | -0.998000 |
| C | -3.843205 | -3.227796 | -2.152133 |
| H | -2.620167 | -2.654197 | -3.835394 |
| H | -5.036747 | -3.467397 | -0.364502 |

|    |           |           |           |
|----|-----------|-----------|-----------|
| H  | -3.892444 | -4.277323 | -2.423495 |
| Cl | -5.220238 | -0.912336 | 0.831930  |
| N  | -1.018480 | 2.647743  | 1.138669  |
| C  | -1.153334 | 1.682385  | 2.238543  |
| C  | -2.071517 | 3.527284  | 1.070543  |
| C  | -2.620794 | 1.821815  | 2.680751  |
| H  | -0.453308 | 1.939434  | 3.042002  |
| H  | -0.907823 | 0.679882  | 1.890581  |
| C  | -3.029083 | 3.223609  | 2.206700  |
| O  | -2.182933 | 4.428091  | 0.228618  |
| H  | -2.730157 | 1.682975  | 3.758460  |
| H  | -3.228555 | 1.068625  | 2.174189  |
| H  | -2.889184 | 3.984013  | 2.986242  |
| H  | -4.063658 | 3.291364  | 1.861103  |

### Structure 10

Eopt =

-2530.878578

86 atoms

|   |           |           |           |
|---|-----------|-----------|-----------|
| C | -1.218921 | 1.329481  | 0.939151  |
| C | -1.468931 | 0.245469  | -0.158603 |
| C | -0.880250 | 0.678799  | -1.532847 |
| C | 0.617126  | 0.608767  | -1.637155 |
| C | 0.212102  | 1.589232  | 1.234278  |
| H | -1.712857 | 2.260368  | 0.650831  |
| H | -1.700713 | 0.981124  | 1.863469  |
| H | -1.298987 | 0.018727  | -2.301812 |
| H | -1.222242 | 1.694751  | -1.767154 |
| H | 1.055806  | -0.374829 | -1.483791 |
| C | -0.198547 | -2.883127 | 1.611665  |
| C | -0.376271 | -3.389440 | 0.133594  |

|   |           |           |           |
|---|-----------|-----------|-----------|
| B | -0.939029 | -1.173948 | 0.281386  |
| O | -0.523843 | -2.135347 | -0.606313 |
| O | -0.901576 | -1.596781 | 1.587354  |
| C | 0.819274  | -4.144391 | -0.430376 |
| H | 0.609905  | -4.444913 | -1.461578 |
| H | 1.721094  | -3.529547 | -0.430702 |
| H | 1.010995  | -5.048857 | 0.155915  |
| C | -1.665067 | -4.182028 | -0.088309 |
| H | -2.535698 | -3.648286 | 0.303370  |
| H | -1.810332 | -4.329134 | -1.162556 |
| H | -1.613145 | -5.164297 | 0.390125  |
| C | 1.254181  | -2.574574 | 1.969943  |
| H | 1.280645  | -2.044782 | 2.926252  |
| H | 1.841303  | -3.491533 | 2.069087  |
| H | 1.726507  | -1.940992 | 1.216498  |
| C | -0.838036 | -3.766233 | 2.672735  |
| H | -1.914530 | -3.867065 | 2.520346  |
| H | -0.386820 | -4.763641 | 2.659338  |
| H | -0.670364 | -3.330488 | 3.662563  |
| C | -5.197764 | -0.333442 | 0.342019  |
| C | -5.067700 | -0.444718 | -1.220255 |
| B | -3.025403 | 0.011326  | -0.290062 |
| O | -3.923021 | 0.286117  | 0.713001  |
| O | -3.617077 | -0.533733 | -1.403331 |
| C | -5.242474 | -1.690631 | 1.046670  |
| H | -4.428683 | -2.341816 | 0.715066  |
| H | -5.135895 | -1.533567 | 2.124022  |
| H | -6.193147 | -2.200130 | 0.865276  |
| C | -6.333584 | 0.554818  | 0.828240  |
| H | -7.296822 | 0.158529  | 0.491168  |

|    |           |           |           |
|----|-----------|-----------|-----------|
| H  | -6.339362 | 0.577306  | 1.922369  |
| H  | -6.230189 | 1.578981  | 0.464469  |
| C  | -5.710837 | -1.681999 | -1.829575 |
| H  | -6.788444 | -1.685127 | -1.636295 |
| H  | -5.559554 | -1.678320 | -2.913384 |
| H  | -5.279988 | -2.600621 | -1.426515 |
| C  | -5.524480 | 0.814855  | -1.958191 |
| H  | -5.065108 | 1.714125  | -1.537156 |
| H  | -5.227237 | 0.737480  | -3.008212 |
| H  | -6.611793 | 0.926036  | -1.916012 |
| C  | 1.416499  | 1.628725  | -1.963882 |
| H  | 0.987337  | 2.620038  | -2.111356 |
| C  | 2.904474  | 1.579451  | -2.182205 |
| H  | 3.138438  | 1.990540  | -3.171705 |
| C  | 0.876211  | 2.869045  | 1.128162  |
| C  | 0.534103  | 5.232095  | 0.459896  |
| H  | 0.840798  | 0.776005  | 1.581426  |
| H  | 3.440402  | 2.212878  | -1.466604 |
| S  | 3.690816  | -0.074392 | -2.234822 |
| C  | 3.929855  | -0.504889 | -0.523668 |
| C  | 4.523012  | -1.741404 | -0.210823 |
| C  | 3.597691  | 0.339538  | 0.547038  |
| C  | 4.803634  | -2.116134 | 1.101394  |
| C  | 3.876116  | -0.026635 | 1.863232  |
| H  | 3.116415  | 1.291878  | 0.371720  |
| C  | 4.484927  | -1.250086 | 2.147941  |
| H  | 5.266267  | -3.077770 | 1.295731  |
| H  | 3.603330  | 0.653239  | 2.663941  |
| H  | 4.699211  | -1.539649 | 3.171546  |
| Cl | 4.950231  | -2.864704 | -1.504750 |

|   |           |          |           |
|---|-----------|----------|-----------|
| C | -0.705867 | 5.923158 | -0.104277 |
| H | -0.491534 | 6.980992 | -0.283859 |
| H | -1.006283 | 5.464021 | -1.051421 |
| H | -1.541613 | 5.852323 | 0.598980  |
| C | 0.913987  | 5.828801 | 1.815718  |
| H | 1.102581  | 6.900732 | 1.695714  |
| H | 0.092550  | 5.704603 | 2.529121  |
| H | 1.810940  | 5.360001 | 2.222699  |
| C | 1.684580  | 5.288283 | -0.546200 |
| H | 1.390053  | 4.820219 | -1.490382 |
| H | 1.930156  | 6.336124 | -0.748127 |
| H | 2.575569  | 4.788825 | -0.164016 |
| O | 0.075391  | 3.840495 | 0.633496  |
| O | 2.055371  | 3.046017 | 1.457168  |

**TS10-cis**

Eopt = -2530.866402

86 atoms

|   |           |           |           |
|---|-----------|-----------|-----------|
| C | 0.042169  | 1.809052  | -1.524569 |
| C | 1.113075  | 0.304785  | -0.345935 |
| C | -0.008604 | 0.127728  | 0.648415  |
| C | -1.204757 | 1.815228  | -0.690180 |
| H | 0.022680  | 1.221777  | -2.437791 |
| H | -2.076262 | 2.040804  | -1.317367 |
| H | 0.157931  | 0.797110  | 1.501202  |
| H | 0.020119  | -0.898754 | 1.030693  |
| H | 1.087040  | -0.357835 | -1.208328 |
| C | 2.353028  | 0.784476  | 0.025850  |
| C | 3.563025  | 0.664454  | -0.822480 |
| H | 2.463143  | 1.307468  | 0.973664  |
| H | 3.346553  | 0.240080  | -1.804649 |

|   |           |           |           |
|---|-----------|-----------|-----------|
| H | 4.064133  | 1.626288  | -0.974140 |
| C | -1.372068 | 0.425741  | -0.013221 |
| H | -1.136057 | 2.595512  | 0.072370  |
| S | 4.908000  | -0.319775 | 0.018749  |
| C | -2.879787 | -1.741769 | -2.752157 |
| C | -1.739093 | -2.672547 | -2.201966 |
| B | -1.745212 | -0.681787 | -1.071662 |
| O | -1.363528 | -1.996872 | -0.958436 |
| O | -2.517305 | -0.442021 | -2.182342 |
| C | -2.174902 | -4.092844 | -1.871945 |
| H | -1.320257 | -4.660071 | -1.490542 |
| H | -2.961126 | -4.107423 | -1.114544 |
| H | -2.543656 | -4.596730 | -2.771189 |
| C | -0.490236 | -2.689936 | -3.085706 |
| H | -0.672579 | -3.234599 | -4.016496 |
| H | -0.158705 | -1.677899 | -3.335275 |
| H | 0.317583  | -3.193068 | -2.546924 |
| C | -4.263638 | -2.088970 | -2.200222 |
| H | -4.960543 | -1.287648 | -2.462748 |
| H | -4.636896 | -3.024274 | -2.627125 |
| H | -4.248279 | -2.184521 | -1.110606 |
| C | -2.927956 | -1.614472 | -4.267671 |
| H | -3.744555 | -0.944550 | -4.553967 |
| H | -1.996383 | -1.210640 | -4.669216 |
| H | -3.112943 | -2.591467 | -4.725717 |
| C | -4.510700 | 0.963533  | 2.073692  |
| C | -3.900838 | -0.333907 | 2.717595  |
| B | -2.557095 | 0.404118  | 1.018874  |
| O | -2.538962 | -0.334355 | 2.178055  |
| O | -3.734485 | 1.088779  | 0.837682  |

|    |           |           |           |
|----|-----------|-----------|-----------|
| C  | -3.825362 | -0.319754 | 4.237268  |
| H  | -4.828610 | -0.233334 | 4.666935  |
| H  | -3.382844 | -1.255742 | 4.591867  |
| H  | -3.215411 | 0.508329  | 4.603667  |
| C  | -4.562331 | -1.623548 | 2.227389  |
| H  | -4.620494 | -1.653928 | 1.135426  |
| H  | -3.964385 | -2.476700 | 2.561144  |
| H  | -5.572120 | -1.730538 | 2.633920  |
| C  | -4.241911 | 2.229481  | 2.889255  |
| H  | -3.184124 | 2.318471  | 3.154047  |
| H  | -4.519481 | 3.101935  | 2.290316  |
| H  | -4.834284 | 2.241357  | 3.808717  |
| C  | -5.986290 | 0.866214  | 1.713671  |
| H  | -6.318632 | 1.809094  | 1.268494  |
| H  | -6.175061 | 0.063911  | 0.997600  |
| H  | -6.585838 | 0.683877  | 2.611376  |
| C  | 4.105494  | -1.875670 | 0.359982  |
| C  | 3.134242  | -2.421269 | -0.496667 |
| C  | 4.445599  | -2.615736 | 1.505172  |
| C  | 2.508398  | -3.630621 | -0.202164 |
| H  | 2.864535  | -1.894300 | -1.403155 |
| C  | 3.836755  | -3.835464 | 1.801661  |
| C  | 2.855750  | -4.341404 | 0.949183  |
| H  | 1.752349  | -4.017018 | -0.877997 |
| H  | 4.126401  | -4.375852 | 2.696331  |
| H  | 2.372840  | -5.284395 | 1.184553  |
| Cl | 5.680448  | -2.022716 | 2.617878  |
| C  | 0.976950  | 2.925803  | -1.606377 |
| O  | 1.801354  | 3.052154  | -2.513942 |
| O  | 0.878435  | 3.763924  | -0.551399 |

|   |          |          |           |
|---|----------|----------|-----------|
| C | 1.756956 | 4.936980 | -0.382821 |
| C | 3.213897 | 4.491342 | -0.251204 |
| H | 3.585177 | 4.062306 | -1.182419 |
| H | 3.830953 | 5.358925 | 0.005370  |
| H | 3.316245 | 3.752056 | 0.549070  |
| C | 1.259757 | 5.539144 | 0.930167  |
| H | 0.205549 | 5.822772 | 0.850558  |
| H | 1.367257 | 4.820745 | 1.749048  |
| H | 1.842557 | 6.432701 | 1.173453  |
| C | 1.548264 | 5.916437 | -1.538331 |
| H | 2.086776 | 6.845549 | -1.324071 |
| H | 1.917165 | 5.507870 | -2.480126 |
| H | 0.485073 | 6.155464 | -1.646472 |

**TS10-trans**

Eopt = -2530.866984

|   |           |           |           |
|---|-----------|-----------|-----------|
| C | -0.098073 | 1.605447  | -2.112749 |
| C | -0.914348 | -0.207591 | -1.185386 |
| C | 0.435018  | -0.875520 | -1.109166 |
| C | 1.357060  | 1.297117  | -1.885668 |
| H | -0.500544 | 1.476898  | -3.110956 |
| H | 1.890289  | 2.199590  | -1.566430 |
| H | 0.626487  | -1.404795 | -2.051745 |
| H | 0.407659  | -1.629904 | -0.314414 |
| H | -1.218029 | 0.320431  | -0.284943 |
| C | -1.918799 | -0.655169 | -2.020732 |
| C | -3.330168 | -0.213831 | -1.910709 |
| H | -1.674930 | -1.341007 | -2.830569 |
| H | -3.449285 | 0.635094  | -1.239675 |
| H | -3.756893 | 0.059076  | -2.881702 |
| C | 1.550313  | 0.160786  | -0.829389 |

|   |           |           |           |
|---|-----------|-----------|-----------|
| H | 1.793485  | 0.976842  | -2.836461 |
| S | -4.461927 | -1.599517 | -1.375348 |
| C | 2.249623  | 1.634892  | 2.608152  |
| C | 0.829491  | 0.988941  | 2.832931  |
| B | 1.496137  | 0.693037  | 0.656902  |
| O | 0.651987  | 0.193543  | 1.618665  |
| O | 2.380780  | 1.620821  | 1.152086  |
| C | 0.733146  | 0.060014  | 4.036307  |
| H | 1.430246  | -0.776901 | 3.960704  |
| H | 0.942343  | 0.609099  | 4.960128  |
| H | -0.281047 | -0.344846 | 4.104220  |
| C | -0.309171 | 2.009418  | 2.860500  |
| H | -0.274269 | 2.614801  | 3.771238  |
| H | -0.272935 | 2.664816  | 1.988761  |
| H | -1.262189 | 1.471806  | 2.844992  |
| C | 3.395634  | 0.783993  | 3.158324  |
| H | 4.345388  | 1.202144  | 2.812687  |
| H | 3.398430  | 0.784177  | 4.252327  |
| H | 3.330516  | -0.249303 | 2.808528  |
| C | 2.379537  | 3.072409  | 3.093118  |
| H | 1.666070  | 3.731285  | 2.594630  |
| H | 2.214390  | 3.127753  | 4.174080  |
| H | 3.389574  | 3.438704  | 2.884362  |
| C | 5.007814  | -1.095947 | -1.821495 |
| C | 4.736803  | -1.895615 | -0.495487 |
| B | 2.963056  | -0.520473 | -0.966025 |
| O | 3.305556  | -1.665995 | -0.284537 |
| O | 3.971165  | -0.061973 | -1.778168 |
| C | 4.980630  | -3.394977 | -0.590704 |
| H | 4.757003  | -3.864303 | 0.372386  |

|    |           |           |           |
|----|-----------|-----------|-----------|
| H  | 4.351536  | -3.859831 | -1.352391 |
| H  | 6.029632  | -3.595840 | -0.831170 |
| C  | 5.461099  | -1.314833 | 0.719779  |
| H  | 6.537889  | -1.498224 | 0.660711  |
| H  | 5.293388  | -0.238636 | 0.810057  |
| H  | 5.080057  | -1.797753 | 1.624054  |
| C  | 4.750903  | -1.915966 | -3.087229 |
| H  | 4.770775  | -1.246901 | -3.952663 |
| H  | 5.520298  | -2.680811 | -3.226642 |
| H  | 3.773458  | -2.406552 | -3.055323 |
| C  | 6.368900  | -0.418899 | -1.895453 |
| H  | 7.168527  | -1.165133 | -1.847325 |
| H  | 6.460956  | 0.116905  | -2.845251 |
| H  | 6.508643  | 0.297131  | -1.083228 |
| C  | -3.842563 | -1.988013 | 0.251899  |
| C  | -3.336800 | -0.999126 | 1.112447  |
| C  | -3.872151 | -3.308424 | 0.731605  |
| C  | -2.854812 | -1.321125 | 2.378883  |
| H  | -3.316125 | 0.033634  | 0.786334  |
| C  | -3.404176 | -3.640166 | 2.003457  |
| C  | -2.884129 | -2.643216 | 2.828362  |
| H  | -2.455871 | -0.535853 | 3.012403  |
| H  | -3.442298 | -4.671714 | 2.336127  |
| H  | -2.508832 | -2.901577 | 3.813336  |
| Cl | -4.522672 | -4.608835 | -0.268162 |
| C  | -0.762509 | 2.616935  | -1.302277 |
| O  | -0.274743 | 3.132248  | -0.295903 |
| O  | -2.005217 | 2.891732  | -1.771740 |
| C  | -2.917687 | 3.825041  | -1.083846 |
| C  | -4.169145 | 3.777635  | -1.958846 |

|   |           |          |           |
|---|-----------|----------|-----------|
| H | -4.933663 | 4.444650 | -1.549000 |
| H | -3.939134 | 4.098674 | -2.979692 |
| H | -4.577635 | 2.763118 | -1.995936 |
| C | -2.318470 | 5.232150 | -1.076693 |
| H | -1.434253 | 5.286140 | -0.440217 |
| H | -2.043148 | 5.532605 | -2.093087 |
| H | -3.065044 | 5.940189 | -0.701920 |
| C | -3.230842 | 3.320473 | 0.326139  |
| H | -3.995957 | 3.963494 | 0.773586  |
| H | -3.627027 | 2.300653 | 0.291950  |
| H | -2.346640 | 3.335821 | 0.963425  |

# References

- [33] C. Lu, C. Wu, D. Ghoreishi, W. Chen, L. Wang, W. Damn, G. A. Ross, M. K. Dahlgren, E. Russell, C. D. Von Bargen, R. Abel, R. A. Friesner, E. D. Harder, OPLS4: Improving Force Field Accuracy on Challenging Regimes of Chemical Space. *J. Chem. Theory. Comput.* **2021**, *17*, 4291-4300.
- [34] Gaussian 16, Revision A.03, M. J. Frisch, G. W. Trucks, H. B. Schlegel, G. E. Scuseria, M. A. Robb, J. R. Cheeseman, G. Scalmani, V. Barone, G. A. Petersson, H. Nakatsuji, X. Li, M. Caricato, A. V. Marenich, J. Bloino, B. G. Janesko, R. Gomperts, B. Mennucci, H. P. Hratchian, J. V. Ortiz, A. F. Izmaylov, J. L. Sonnenberg, D. Williams-Young, F. Ding, F. Lipparini, F. Egidi, J. Goings, B. Peng, A. Petrone, T. Henderson, D. Ranasinghe, V. G. Zakrzewski, J. Gao, N. Rega, G. Zheng, W. Liang, M. Hada, M. Ehara, K. Toyota, R. Fukuda, J. Hasegawa, M. Ishida, T. Nakajima, Y. Honda, O. Kitao, H. Nakai, T. Vreven, K. Throssell, J. A. Montgomery, Jr., J. E. Peralta, F. Ogliaro, M. J. Bearpark, J. J. Heyd, E. N. Brothers, K. N. Kudin, V. N. Staroverov, T. A. Keith, R. Kobayashi, J. Normand, K. Raghavachari, A. P. Rendell, J. C. Burant, S. S. Iyengar, J. Tomasi, M. Cossi, J. M. Millam, M. Klene, C. Adamo, R. Cammi, J. W. Ochterski, R. L. Martin, K. Morokuma, O. Farkas, J. B. Foresman, and D. J. Fox, Gaussian, Inc., Wallingford CT, 2016.
- [35] Neese F. Software update: The ORCA program system—Version 5.0. *WIREs Comput Mol Sci.* 2022; 12:e1606.
- [36] Axel D. Becke, Density-functional thermochemistry. III. The role of exact exchange, *J. Chem. Phys.* **1993**, *98* (7), 5648–5652.
- [37] C. Lee, W. Yang, R. G. Parr, Development of the Colle-Salvetti correlation-energy formula into a functional of the electron density, *Phys. Rev. B.* **1988**, *37*, 785-789.
- [38] S. Grimme, J. Antony, S. Ehrlich, H. Krieg, A consistent and accurate *ab initio* parameterization of density functional dispersion correction (DFT-D) for the 94 elements H-Pu, *J. Chem. Phys.* **2010**, *132* (15), 154104.
- [39] S. Grimme, S. Ehrlich, L. Goerigk, Effect of the damping function in dispersion corrected density functional theory, *J. Comput. Chem.* **2011**, *32* (7), 1456-1465.
- [40] V. A. Rassolov, M. A. Ratner, J. A. Pople, P. C. Redfern, L. A. Curtiss, 6-31G\* Basis set for third-row atoms, *J. Comput. Chem.* **2001**, *22* (9), 976-984.
- [41] M. M. Francl, W. J. Pietro, W. J. Hehre, J. S. Binkley, M. S. Gordon, D. J. DeFrees, J. A. Pople, Self-consistent molecular orbitals methods. XXIII. A polarization-type basis set for second-row elements, *J. Chem. Phys.* **1982**, *77* (7), 3654-3665.
- [42] P. C. Hariharan, J. A. Pople, The influence of polarization functions on molecular orbital hydrogenation energies, *Theor. Chim. Acta.* **1973**, *28* (3), 213–222.
- [43] W. J. Hehre, R. Ditchfield, J. A. Pople, Self-consistent molecular orbital methods. xii. further extensions of gaussian-type basis sets for use in molecular orbital studies of organic molecules, *J. Chem. Phys.* **1972**, *56* (5), 2257–2261.
- [44] T. Clark, J. Chandrasekhar, G. W. Spitznagel, P. V. R. Schleyer, Efficient diffuse function-augmented basis sets for anion calculations. III. The 3-21+G basis set for first-row elements Li–F, *J. Comput. Chem.* **1983**, *4* (3), 294–301.
- [45] Y. Zhao, D. G. Truhlar, The M06 suite of density functionals for main group thermochemistry, thermochemical kinetics, noncovalent interactions, excited states, and transition elements: two new functionals and systematic testing of four M06-class functionals and 12 other functionals, *Theor. Chem. Acc.* **2008**, *120*, 215-241.

- [46] F. Weigend, R. Ahlrichs, Balanced basis sets of split valence, triple zeta valence and quadruple zeta valence quality for H to Rn: Design and assessment of accuracy, *Phys. Chem. Chem. Phys.* **2005**, *7*, 3297–3305
- [47] F. Weigend, Accurate Coulomb-fitting basis sets for H to Rn, *Phys. Chem. Chem. Phys.* **2006**, *8*, 1057–1065
- [48] A. V. Marenich, C. J. Cramer, G. G. Truhlar, Universal Solvation Model Based on Solute Electron Density and on a Continuum Model of the Solvent Defined by the Bulk Dielectric Constant and Atomic Surface Tensions, *J. Chem. Phys. B* **2009**, *113*, 6378–6396.
- [49] E. Cancès, B. Mennucci, J. Tomasi, A new integral equation formalism for the polarizable continuum model: Theoretical background and applications to isotropic and anisotropic dielectrics, *J. Chem. Phys. B* **1997**, *107*, 3032–3041.
- [50] B. Mennucci, E. Cancès, J. Tomasi, Evaluation of Solvent Effects in Isotropic and Anisotropic Dielectrics and in Ionic Solutions with a Unified Integral Equation Method: Theoretical Bases, Computational Implementation, and Numerical Applications, *J. Chem. Phys. B* **1997**, *101*, 10506–10517.
- [51] G. Scalmani, M. J. Frisch, Continuous surface charge polarizable continuum models of solvation. I. General formalism, *J. Chem. Phys.* **2010**, *132*, 114110.
- [52] J. Tomasi, B. Mennucci, E. Cancès, The IEF version of the PCM solvation method: an overview of a new method addressed to study molecular solutes at the QM ab initio level, *J. Mol. Struct.-Theochem.* **1999**, *464*, 211–226.
- [53] B. Mennucci, J. Tomasi, Continuum solvation models: A new approach to the problem of solute's charge distribution and cavity boundaries, *J. Chem. Phys.* **1997**, *106*, 5151–5158.
